# Supplementary material
Source: PubMed Central journal article supplement (PMC3365172)
Supplement: 1200857109_pnas.201200857SI.pdf [file 1200857109_pnas.201200857SI.pdf]

# Supporting Information

de Quervain et al. 10.1073/pnas.1200857109

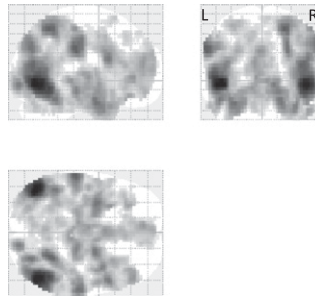

Fig. S1. Genotype-independent, subsequent memory analysis for negative information, thresholded at  $P < 0.05$ , FDR corrected for whole brain. Sagittal, coronal, and axial SPM glass-brain projections are shown. L, left side of the brain; R, right side of the brain.

Table S1. Nominal significance of associated SNPs (negative pictures free recall,  $P_{\text{uncorrected}} < 0.01$ ) in the hypothesis-testing sample ( $n = 723$ )

| Affymetrix marker    | Chromosome | Position          | dbSNP RS ID      | Associated gene | Cytoband     | Call rate    | MAF         | HWE $P$            | Association $P$ |
|----------------------|------------|-------------------|------------------|-----------------|--------------|--------------|-------------|--------------------|-----------------|
| <b>SNP_A-8703022</b> | <b>17</b>  | <b>62,209,616</b> | <b>rs4790904</b> | <b>PRKCA</b>    | <b>q24.2</b> | <b>0.997</b> | <b>0.20</b> | <b>0.697077012</b> | <b>0.000002</b> |
| SNP_A-1995659        | 10         | 12,875,051        | rs928337         | CAMK1D          | p13          | 1.000        | 0.41        | 0.353067038        | 0.00078         |
| SNP_A-1995661        | 10         | 12,875,594        | rs2493766        | CAMK1D          | p13          | 0.999        | 0.37        | 0.716531688        | 0.00081         |
| SNP_A-1806035        | 10         | 12,887,844        | rs4750267        | CAMK1D          | p13          | 0.997        | 0.37        | 0.80609225         | 0.0012          |
| SNP_A-1936417        | 10         | 12,880,848        | rs1556408        | CAMK1D          | p13          | 0.997        | 0.37        | 0.797212222        | 0.0013          |
| SNP_A-8659980        | 10         | 12,891,662        | rs12358381       | CAMK1D          | p13          | 1.000        | 0.27        | 0.049411446        | 0.0014          |
| SNP_A-1985684        | 6          | 36,127,314        | rs17714205       | MAPK14          | p21.31       | 0.997        | 0.13        | 0.524852836        | 0.0017          |
| SNP_A-8281277        | 10         | 12,874,932        | rs928336         | CAMK1D          | p13          | 0.994        | 0.43        | 0.170919012        | 0.0019          |
| SNP_A-2111454        | 10         | 12,890,474        | rs10906229       | CAMK1D          | p13          | 0.999        | 0.35        | 0.714469219        | 0.0020          |
| SNP_A-2108498        | 6          | 36,184,912        | rs3804452        | MAPK14          | p21.31       | 0.999        | 0.13        | 0.550959233        | 0.0024          |
| SNP_A-2222070        | 17         | 62,147,088        | rs16960114       | PRKCA           | q24.2        | 0.993        | 0.20        | 0.780677016        | 0.0028          |
| SNP_A-8281665        | 10         | 12,876,558        | rs1929389        | CAMK1D          | p13          | 1.000        | 0.43        | 0.18044124         | 0.0030          |
| SNP_A-1816092        | 10         | 49,265,870        | rs17697960       | MAPK8           | q11.22       | 1.000        | 0.11        | 0.148347676        | 0.0033          |
| SNP_A-2000443        | 10         | 49,312,216        | rs7086275        | MAPK8           | q11.22       | 0.999        | 0.42        | 0.628650983        | 0.0041          |
| SNP_A-4248684        | 10         | 49,290,273        | rs9888128        | MAPK8           | q11.22       | 1.000        | 0.43        | 0.729951509        | 0.0045          |
| SNP_A-2000441        | 10         | 49,312,152        | rs11101320       | MAPK8           | q11.22       | 0.994        | 0.42        | 0.661763446        | 0.0047          |
| SNP_A-1781918        | 10         | 49,264,246        | rs10857560       | MAPK8           | q11.22       | 0.999        | 0.43        | 0.395575993        | 0.0048          |
| SNP_A-8637914        | 17         | 61,737,476        | rs7210446        | PRKCA           | q24.2        | 0.990        | 0.44        | 0.87454757         | 0.0049          |
| SNP_A-4229112        | 17         | 64,035,235        | rs3785906        | PRKAR1A         | q24.2        | 1.000        | 0.23        | 0.815795241        | 0.0054          |
| SNP_A-8550960        | 7          | 151,186,459       | rs6961830        | PRKAG2          | q36.1        | 0.994        | 0.18        | 0.93078015         | 0.0056          |
| SNP_A-1931100        | 10         | 12,872,599        | rs4747999        | CAMK1D          | p13          | 1.000        | 0.41        | 0.250623163        | 0.0056          |
| SNP_A-8470906        | 17         | 64,023,836        | rs4281788        | PRKAR1A         | q24.2        | 0.999        | 0.23        | 0.770857219        | 0.0061          |
| SNP_A-2163878        | 10         | 49,261,724        | rs2698761        | MAPK8           | q11.22       | 1.000        | 0.43        | 0.747074632        | 0.0062          |
| SNP_A-4222841        | 10         | 49,220,700        | rs6537561        | MAPK8           | q11.22       | 1.000        | 0.43        | 0.864461361        | 0.0064          |
| SNP_A-8676867        | 6          | 161,418,462       | rs9458114        | MAP3K4          | q26          | 0.997        | 0.07        | 0.45633922         | 0.0077          |
| SNP_A-4292124        | 10         | 6,539,234         | rs4750491        | PRKCC           | p15.1        | 0.994        | 0.34        | 0.052291675        | 0.0081          |
| SNP_A-2146600        | 17         | 62,196,905        | rs4381631        | PRKCA           | q24.2        | 0.999        | 0.47        | 0.596302414        | 0.0082          |
| SNP_A-2055994        | 17         | 62,148,632        | rs4465636        | PRKCA           | q24.2        | 0.994        | 0.20        | 0.584940644        | 0.0093          |
| SNP_A-2237869        | 10         | 12,686,538        | rs7906212        | CAMK1D          | p13          | 0.990        | 0.07        | 0.752773631        | 0.0095          |
| SNP_A-8330608        | 17         | 61,738,935        | rs4577128        | PRKCA           | q24.2        | 1.000        | 0.44        | 0.583248971        | 0.0096          |
| SNP_A-8366935        | 6          | 161,338,632       | rs625977         | MAP3K4          | q26          | 1.000        | 0.17        | 0.586805235        | 0.0099          |

Bonferroni-corrected SNPs are in boldface type. HWE, Hardy–Weinberg equilibrium; MAF, minor allele frequency; dbSNP RS, reference SNP sequence number according the National Center for Biotechnology Information SNP data base.

**Table S2. Genotype-dependent differences in arousal and valence ratings (n = 716)**

| Genotype, rs4790904 | Arousal negative pictures,<br>mean $\pm$ SEM | Valence negative pictures,<br>mean $\pm$ SEM |
|---------------------|----------------------------------------------|----------------------------------------------|
| AA, n = 456         | 1.67 $\pm$ 0.02                              | 2.78 $\pm$ 0.01                              |
| AG, n = 229         | 1.67 $\pm$ 0.02                              | 2.79 $\pm$ 0.01                              |
| GG, n = 31          | 1.64 $\pm$ 0.07                              | 2.76 $\pm$ 0.04                              |
|                     | P = 0.9                                      | P = 0.8                                      |

**Table S3. Genotype-dependent performance in the 0- and 2-back task (n = 678)**

| Genotype, rs4790904 | Accuracy, 0-back,<br>mean $\pm$ SEM | Accuracy, 2-back,<br>mean $\pm$ SEM |
|---------------------|-------------------------------------|-------------------------------------|
| AA, n = 428         | 0.964 $\pm$ 0.002                   | 0.869 $\pm$ 0.005                   |
| AG, n = 219         | 0.962 $\pm$ 0.002                   | 0.873 $\pm$ 0.006                   |
| GG, n = 31          | 0.971 $\pm$ 0.04                    | 0.874 $\pm$ 0.016                   |
|                     | P = 0.9                             | P = 0.6                             |

**Table S4. Genotype-dependent memory performance (24-h delay) in the hypothesis-testing sample (n = 719)**

| Genotype, rs4790904 | Negative pictures,<br>mean $\pm$ SEM | Positive pictures,<br>mean $\pm$ SEM | Neutral pictures,<br>mean $\pm$ SEM | All pictures,<br>mean $\pm$ SEM |
|---------------------|--------------------------------------|--------------------------------------|-------------------------------------|---------------------------------|
| AA, n = 456         | 7.7 $\pm$ 0.2                        | 8.1 $\pm$ 0.2                        | 4.8 $\pm$ 0.1                       | 20.7 $\pm$ 0.4                  |
| AG, n = 231         | 7.0 $\pm$ 0.2                        | 7.8 $\pm$ 0.2                        | 4.2 $\pm$ 0.2                       | 19.0 $\pm$ 0.5                  |
| GG, n = 32          | 5.6 $\pm$ 0.4                        | 7.1 $\pm$ 0.4                        | 3.7 $\pm$ 0.5                       | 16.4 $\pm$ 0.8                  |
|                     | P = 0.0001                           | P = 0.07                             | P = 0.0006                          | P = 0.0004                      |
