# Supplementary material
Source: PubMed Central journal article supplement (PMC3365172)
Supplement: 1200857109_sapp.pdf [file 1200857109_sapp.pdf]

| Marker        | Chromosome | Position  | dbSNP RS ID | Associated Gene | Cytoband | Minor Allele Freq. | HWE P |
|---------------|------------|-----------|-------------|-----------------|----------|--------------------|-------|
| SNP_A-8403040 | 1          | 2013924   | rs2459994   | PRKCZ           | p36.33   | 0.209              | 0.089 |
| SNP_A-1908463 | 1          | 2017761   | rs7513222   | PRKCZ           | p36.33   | 0.346              | 0.876 |
| SNP_A-8654028 | 1          | 2023116   | rs908742    | PRKCZ           | p36.33   | 0.347              | 0.680 |
| SNP_A-8581056 | 1          | 2030758   | rs4648807   | PRKCZ           | p36.33   | 0.413              | 0.337 |
| SNP_A-1955996 | 1          | 2037444   | rs3107146   | PRKCZ           | p36.33   | 0.122              | 0.295 |
| SNP_A-2131370 | 1          | 2051829   | rs3107157   | PRKCZ           | p36.33   | 0.418              | 0.635 |
| SNP_A-2203009 | 1          | 2059541   | rs3753242   | PRKCZ           | p36.33   | 0.071              | 0.080 |
| SNP_A-8631231 | 1          | 2061598   | rs3128298   | PRKCZ           | p36.33   | 0.088              | 0.793 |
| SNP_A-8351773 | 1          | 2063964   | rs12026349  | PRKCZ           | p36.33   | 0.104              | 0.309 |
| SNP_A-8438441 | 1          | 2064928   | rs451061    | PRKCZ           | p36.33   | 0.387              | 0.429 |
| SNP_A-2098546 | 1          | 2067269   | rs385039    | PRKCZ           | p36.33   | 0.284              | 0.868 |
| SNP_A-8385581 | 1          | 2071502   | rs3107126   | PRKCZ           | p36.33   | 0.105              | 0.175 |
| SNP_A-8404055 | 1          | 2072349   | rs262669    | PRKCZ           | p36.33   | 0.388              | 0.295 |
| SNP_A-8317896 | 1          | 2072426   | rs2257182   | PRKCZ           | p36.33   | 0.398              | 0.069 |
| SNP_A-2264565 | 1          | 2094841   | rs262641    | PRKCZ           | p36.33   | 0.282              | 0.418 |
| SNP_A-1788728 | 1          | 2095738   | rs3128309   | PRKCZ           | p36.33   | 0.099              | 0.668 |
| SNP_A-4250389 | 1          | 2100120   | rs626479    | PRKCZ           | p36.33   | 0.281              | 0.801 |
| SNP_A-8710152 | 1          | 27556983  | rs4970520   | MAP3K6          | p36.11   | 0.210              | 0.397 |
| SNP_A-8676195 | 1          | 27562884  | rs4075731   | MAP3K6          | p36.11   | 0.361              | 0.413 |
| SNP_A-8379006 | 1          | 56895055  | rs2143749   | PRKAA2          | p32.2    | 0.354              | 0.778 |
| SNP_A-1946127 | 1          | 56899238  | rs2746349   | PRKAA2          | p32.2    | 0.499              | 0.520 |
| SNP_A-1900762 | 1          | 56899463  | rs2796529   | PRKAA2          | p32.2    | 0.147              | 0.138 |
| SNP_A-2130663 | 1          | 56899507  | rs2746347   | PRKAA2          | p32.2    | 0.124              | 0.345 |
| SNP_A-8418742 | 1          | 56900427  | rs2796528   | PRKAA2          | p32.2    | 0.173              | 0.122 |
| SNP_A-4202067 | 1          | 56903176  | rs2796519   | PRKAA2          | p32.2    | 0.472              | 0.964 |
| SNP_A-1832915 | 1          | 56905582  | rs10889008  | PRKAA2          | p32.2    | 0.451              | 0.840 |
| SNP_A-8409936 | 1          | 56911958  | rs2746339   | PRKAA2          | p32.2    | 0.469              | 0.192 |
| SNP_A-8438724 | 1          | 56917661  | rs2092595   | PRKAA2          | p32.2    | 0.470              | 0.156 |
| SNP_A-2000072 | 1          | 56922085  | rs2796512   | PRKAA2          | p32.2    | 0.475              | 0.161 |
| SNP_A-1960148 | 1          | 56925602  | rs7515414   | PRKAA2          | p32.2    | 0.443              | 0.654 |
| SNP_A-8345751 | 1          | 56930881  | rs7419053   | PRKAA2          | p32.2    | 0.442              | 0.891 |
| SNP_A-8347257 | 1          | 56950377  | rs857147    | PRKAA2          | p32.2    | 0.482              | 0.074 |
| SNP_A-2222110 | 1          | 84323437  | rs6701486   | PRKACB          | p31.1    | 0.227              | 0.063 |
| SNP_A-8515179 | 1          | 84325194  | rs7546625   | PRKACB          | p31.1    | 0.162              | 0.246 |
| SNP_A-8411322 | 1          | 84328496  | rs6703653   | PRKACB          | p31.1    | 0.311              | 0.187 |
| SNP_A-2102459 | 1          | 84329111  | rs12405120  | PRKACB          | p31.1    | 0.452              | 0.587 |
| SNP_A-4301860 | 1          | 84334853  | rs10493750  | PRKACB          | p31.1    | 0.457              | 0.614 |
| SNP_A-2000160 | 1          | 84343593  | rs2642186   | PRKACB          | p31.1    | 0.223              | 0.052 |
| SNP_A-8527233 | 1          | 84357711  | rs12724598  | PRKACB          | p31.1    | 0.237              | 0.907 |
| SNP_A-1920852 | 1          | 84362717  | rs1016379   | PRKACB          | p31.1    | 0.232              | 0.537 |
| SNP_A-2028586 | 1          | 84362903  | rs12723299  | PRKACB          | p31.1    | 0.460              | 0.063 |
| SNP_A-1789609 | 1          | 84363115  | rs2139931   | PRKACB          | p31.1    | 0.232              | 0.537 |
| SNP_A-1932323 | 1          | 84366987  | rs11163905  | PRKACB          | p31.1    | 0.460              | 0.124 |
| SNP_A-8301655 | 1          | 84376075  | rs2642183   | PRKACB          | p31.1    | 0.235              | 0.494 |
| SNP_A-8536993 | 1          | 84377525  | rs6576962   | PRKACB          | p31.1    | 0.462              | 0.141 |
| SNP_A-8672434 | 1          | 84396892  | rs6696125   | PRKACB          | p31.1    | 0.452              | 0.054 |
| SNP_A-8498602 | 1          | 84401243  | rs12129768  | PRKACB          | p31.1    | 0.109              | 0.252 |
| SNP_A-2289186 | 1          | 84421173  | rs589373    | PRKACB          | p31.1    | 0.111              | 0.872 |
| SNP_A-4202513 | 1          | 84431717  | rs6661411   | PRKACB          | p31.1    | 0.133              | 0.754 |
| SNP_A-2094409 | 1          | 84435529  | rs2134648   | PRKACB          | p31.1    | 0.455              | 0.052 |
| SNP_A-8386970 | 1          | 84436778  | rs12125649  | PRKACB          | p31.1    | 0.053              | 0.556 |
| SNP_A-2021835 | 1          | 84440040  | rs603939    | PRKACB          | p31.1    | 0.219              | 0.075 |
| SNP_A-2293326 | 1          | 84450848  | rs2134646   | PRKACB          | p31.1    | 0.450              | 0.211 |
| SNP_A-2115979 | 1          | 145095103 | rs11584787  | PRKAB2          | q21.1    | 0.262              | 0.869 |
| SNP_A-8446640 | 1          | 145095366 | rs1837984   | PRKAB2          | q21.1    | 0.425              | 0.326 |
| SNP_A-1965870 | 1          | 145097540 | rs2304893   | PRKAB2          | q21.1    | 0.075              | 0.775 |
| SNP_A-8712903 | 1          | 145102761 | rs6593738   | PRKAB2          | q21.1    | 0.425              | 0.958 |
| SNP_A-1956171 | 1          | 145102789 | rs6593739   | PRKAB2          | q21.1    | 0.384              | 0.798 |
| SNP_A-8575061 | 1          | 145108310 | rs3766522   | PRKAB2          | q21.1    | 0.247              | 0.893 |
| SNP_A-2212982 | 1          | 204937958 | rs4845129   | MAPKAPK2        | q32.1    | 0.237              | 0.768 |
| SNP_A-8701207 | 1          | 204938407 | rs10863784  | MAPKAPK2        | q32.1    | 0.108              | 0.659 |
| SNP_A-8348404 | 1          | 204939110 | rs4845130   | MAPKAPK2        | q32.1    | 0.227              | 0.113 |
| SNP_A-4202986 | 1          | 204940357 | rs17350838  | MAPKAPK2        | q32.1    | 0.202              | 0.842 |
| SNP_A-4290223 | 1          | 204940780 | rs17350845  | MAPKAPK2        | q32.1    | 0.235              | 0.697 |
| SNP_A-8674898 | 1          | 204943515 | rs11119342  | MAPKAPK2        | q32.1    | 0.232              | 0.546 |
| SNP_A-8412643 | 1          | 204943960 | rs12060808  | MAPKAPK2        | q32.1    | 0.405              | 0.158 |
| SNP_A-8448630 | 1          | 204944397 | rs6691678   | MAPKAPK2        | q32.1    | 0.233              | 0.573 |
| SNP_A-8313470 | 1          | 204957058 | rs6669284   | MAPKAPK2        | q32.1    | 0.325              | 0.293 |
| SNP_A-8602038 | 1          | 204963373 | rs4240848   | MAPKAPK2        | q32.1    | 0.212              | 0.053 |
| SNP_A-8362304 | 1          | 204964104 | rs4607880   | MAPKAPK2        | q32.1    | 0.212              | 0.049 |
| SNP_A-2198036 | 1          | 204965675 | rs11119385  | MAPKAPK2        | q32.1    | 0.324              | 0.266 |
| SNP_A-8666515 | 1          | 207825250 | rs17014830  | CAMK1G          | q32.2    | 0.188              | 0.168 |
| SNP_A-8666517 | 1          | 207829498 | rs11587591  | CAMK1G          | q32.2    | 0.312              | 0.199 |

|               |   |           |            |        |       |       |       |
|---------------|---|-----------|------------|--------|-------|-------|-------|
| SNP_A-2288939 | 1 | 207831499 | rs7528476  | CAMK1G | q32.2 | 0.323 | 0.407 |
| SNP_A-2236830 | 1 | 207831616 | rs7516885  | CAMK1G | q32.2 | 0.189 | 0.200 |
| SNP_A-8320366 | 1 | 207837970 | rs9429821  | CAMK1G | q32.2 | 0.378 | 0.371 |
| SNP_A-8446064 | 1 | 207844298 | rs17014866 | CAMK1G | q32.2 | 0.146 | 0.373 |
| SNP_A-8661823 | 1 | 207844716 | rs2235452  | CAMK1G | q32.2 | 0.152 | 0.827 |
| SNP_A-8451997 | 1 | 207844906 | rs2235453  | CAMK1G | q32.2 | 0.150 | 0.726 |
| SNP_A-8306040 | 1 | 207845978 | rs12402938 | CAMK1G | q32.2 | 0.150 | 0.993 |
| SNP_A-8351700 | 1 | 207846011 | rs2076224  | CAMK1G | q32.2 | 0.263 | 0.368 |
| SNP_A-2238360 | 1 | 207847371 | rs760832   | CAMK1G | q32.2 | 0.325 | 0.678 |
| SNP_A-8630951 | 1 | 207847748 | rs760833   | CAMK1G | q32.2 | 0.185 | 0.579 |
| SNP_A-4265019 | 1 | 207848451 | rs10489339 | CAMK1G | q32.2 | 0.147 | 0.141 |
| SNP_A-4293077 | 1 | 207848966 | rs11119314 | CAMK1G | q32.2 | 0.376 | 0.904 |
| SNP_A-2218232 | 2 | 39333719  | rs3770675  | MAP4K3 | p22.1 | 0.092 | 0.382 |
| SNP_A-2281853 | 2 | 39340050  | rs7608958  | MAP4K3 | p22.1 | 0.167 | 0.437 |
| SNP_A-2289659 | 2 | 39342336  | rs10865148 | MAP4K3 | p22.1 | 0.163 | 0.458 |
| SNP_A-8329880 | 2 | 39342942  | rs10172736 | MAP4K3 | p22.1 | 0.086 | 0.226 |
| SNP_A-1859895 | 2 | 39346789  | rs3770670  | MAP4K3 | p22.1 | 0.085 | 0.425 |
| SNP_A-8464261 | 2 | 39346825  | rs17505544 | MAP4K3 | p22.1 | 0.365 | 0.837 |
| SNP_A-4294761 | 2 | 39347701  | rs2302749  | MAP4K3 | p22.1 | 0.167 | 0.625 |
| SNP_A-1816658 | 2 | 39347973  | rs10865149 | MAP4K3 | p22.1 | 0.090 | 0.319 |
| SNP_A-2254407 | 2 | 39357195  | rs7600014  | MAP4K3 | p22.1 | 0.082 | 0.339 |
| SNP_A-2231943 | 2 | 39366439  | rs7601700  | MAP4K3 | p22.1 | 0.083 | 0.343 |
| SNP_A-2292431 | 2 | 39383380  | rs10865150 | MAP4K3 | p22.1 | 0.078 | 0.475 |
| SNP_A-4285622 | 2 | 39383640  | rs3770664  | MAP4K3 | p22.1 | 0.180 | 0.543 |
| SNP_A-1903005 | 2 | 39385585  | rs7595469  | MAP4K3 | p22.1 | 0.167 | 0.286 |
| SNP_A-2238618 | 2 | 39394518  | rs11688352 | MAP4K3 | p22.1 | 0.450 | 0.738 |
| SNP_A-8399053 | 2 | 39407880  | rs2024514  | MAP4K3 | p22.1 | 0.155 | 0.522 |
| SNP_A-8385013 | 2 | 39409448  | rs9309036  | MAP4K3 | p22.1 | 0.170 | 0.532 |
| SNP_A-2076719 | 2 | 39419076  | rs4630750  | MAP4K3 | p22.1 | 0.114 | 0.711 |
| SNP_A-1882720 | 2 | 39419339  | rs1211996  | MAP4K3 | p22.1 | 0.106 | 0.476 |
| SNP_A-4296109 | 2 | 39433881  | rs2058863  | MAP4K3 | p22.1 | 0.141 | 0.934 |
| SNP_A-1833820 | 2 | 39436950  | rs7422651  | MAP4K3 | p22.1 | 0.108 | 0.440 |
| SNP_A-4288549 | 2 | 39439768  | rs2005892  | MAP4K3 | p22.1 | 0.091 | 0.347 |
| SNP_A-8335477 | 2 | 39454226  | rs6544221  | MAP4K3 | p22.1 | 0.137 | 0.894 |
| SNP_A-1893857 | 2 | 39455393  | rs17508058 | MAP4K3 | p22.1 | 0.105 | 0.724 |
| SNP_A-8572875 | 2 | 39456220  | rs10490305 | MAP4K3 | p22.1 | 0.053 | 0.166 |
| SNP_A-8493114 | 2 | 39456454  | rs11898704 | MAP4K3 | p22.1 | 0.060 | 0.113 |
| SNP_A-4208015 | 2 | 39459421  | rs2373530  | MAP4K3 | p22.1 | 0.078 | 0.680 |
| SNP_A-2078677 | 2 | 39472170  | rs4670932  | MAP4K3 | p22.1 | 0.102 | 0.134 |
| SNP_A-1882862 | 2 | 39480959  | rs6712274  | MAP4K3 | p22.1 | 0.080 | 0.547 |
| SNP_A-2141736 | 2 | 45733626  | rs650508   | PRKCE  | p21   | 0.277 | 0.098 |
| SNP_A-8573026 | 2 | 45741435  | rs666214   | PRKCE  | p21   | 0.139 | 0.454 |
| SNP_A-1843743 | 2 | 45752034  | rs17033965 | PRKCE  | p21   | 0.139 | 0.312 |
| SNP_A-8488309 | 2 | 45755619  | rs17033973 | PRKCE  | p21   | 0.134 | 0.763 |
| SNP_A-1916651 | 2 | 45755958  | rs556650   | PRKCE  | p21   | 0.204 | 0.737 |
| SNP_A-4240771 | 2 | 45759450  | rs2204204  | PRKCE  | p21   | 0.236 | 0.281 |
| SNP_A-2153368 | 2 | 45760818  | rs3795863  | PRKCE  | p21   | 0.242 | 0.201 |
| SNP_A-8316145 | 2 | 45762141  | rs12185636 | PRKCE  | p21   | 0.278 | 0.385 |
| SNP_A-2044493 | 2 | 45764120  | rs2285024  | PRKCE  | p21   | 0.297 | 0.407 |
| SNP_A-1963021 | 2 | 45764396  | rs505310   | PRKCE  | p21   | 0.399 | 0.080 |
| SNP_A-8573027 | 2 | 45769512  | rs547018   | PRKCE  | p21   | 0.289 | 0.371 |
| SNP_A-1963022 | 2 | 45769556  | rs10490342 | PRKCE  | p21   | 0.128 | 0.940 |
| SNP_A-1963023 | 2 | 45777789  | rs612717   | PRKCE  | p21   | 0.194 | 0.206 |
| SNP_A-1963024 | 2 | 45777848  | rs10490341 | PRKCE  | p21   | 0.129 | 0.904 |
| SNP_A-1953213 | 2 | 45780894  | rs656823   | PRKCE  | p21   | 0.196 | 0.178 |
| SNP_A-2098969 | 2 | 45782134  | rs563601   | PRKCE  | p21   | 0.322 | 0.995 |
| SNP_A-2184209 | 2 | 45783623  | rs609573   | PRKCE  | p21   | 0.300 | 0.329 |
| SNP_A-4223110 | 2 | 45785550  | rs637889   | PRKCE  | p21   | 0.328 | 0.667 |
| SNP_A-8396642 | 2 | 45786353  | rs642200   | PRKCE  | p21   | 0.284 | 0.521 |
| SNP_A-8440446 | 2 | 45788855  | rs11677079 | PRKCE  | p21   | 0.193 | 0.115 |
| SNP_A-1841802 | 2 | 45797830  | rs1522986  | PRKCE  | p21   | 0.125 | 0.557 |
| SNP_A-2187669 | 2 | 45797898  | rs1522987  | PRKCE  | p21   | 0.124 | 0.560 |
| SNP_A-1907487 | 2 | 45799725  | rs6724488  | PRKCE  | p21   | 0.191 | 0.154 |
| SNP_A-2194892 | 2 | 45800304  | rs6725257  | PRKCE  | p21   | 0.189 | 0.204 |
| SNP_A-8349655 | 2 | 45800613  | rs6728564  | PRKCE  | p21   | 0.315 | 0.523 |
| SNP_A-1963026 | 2 | 45807414  | rs1464572  | PRKCE  | p21   | 0.362 | 0.594 |
| SNP_A-2028324 | 2 | 45811755  | rs10201978 | PRKCE  | p21   | 0.166 | 0.297 |
| SNP_A-2166911 | 2 | 45813464  | rs6743119  | PRKCE  | p21   | 0.469 | 0.914 |
| SNP_A-8424861 | 2 | 45816505  | rs6740453  | PRKCE  | p21   | 0.057 | 0.991 |
| SNP_A-8458937 | 2 | 45817404  | rs938659   | PRKCE  | p21   | 0.478 | 0.878 |
| SNP_A-8707406 | 2 | 45818458  | rs17034088 | PRKCE  | p21   | 0.059 | 0.906 |
| SNP_A-8464919 | 2 | 45821800  | rs10170642 | PRKCE  | p21   | 0.059 | 0.119 |
| SNP_A-8692923 | 2 | 45821961  | rs10170750 | PRKCE  | p21   | 0.448 | 0.302 |
| SNP_A-8685544 | 2 | 45822684  | rs7568380  | PRKCE  | p21   | 0.451 | 0.133 |

|               |   |          |            |       |     |       |       |
|---------------|---|----------|------------|-------|-----|-------|-------|
| SNP_A-8314466 | 2 | 45827640 | rs6716268  | PRKCE | p21 | 0.305 | 0.608 |
| SNP_A-8539881 | 2 | 45828359 | rs6760916  | PRKCE | p21 | 0.333 | 0.658 |
| SNP_A-8625740 | 2 | 45829924 | rs11125030 | PRKCE | p21 | 0.335 | 0.764 |
| SNP_A-8625225 | 2 | 45830086 | rs11890554 | PRKCE | p21 | 0.382 | 0.951 |
| SNP_A-8399918 | 2 | 45830257 | rs4953245  | PRKCE | p21 | 0.496 | 0.600 |
| SNP_A-8463542 | 2 | 45830976 | rs6757543  | PRKCE | p21 | 0.129 | 0.333 |
| SNP_A-2270737 | 2 | 45835424 | rs938661   | PRKCE | p21 | 0.438 | 0.916 |
| SNP_A-8643876 | 2 | 45835534 | rs867286   | PRKCE | p21 | 0.311 | 0.569 |
| SNP_A-2249205 | 2 | 45836149 | rs884400   | PRKCE | p21 | 0.438 | 0.916 |
| SNP_A-8699515 | 2 | 45837022 | rs1468042  | PRKCE | p21 | 0.441 | 0.725 |
| SNP_A-8311894 | 2 | 45838890 | rs4953247  | PRKCE | p21 | 0.439 | 0.932 |
| SNP_A-8681838 | 2 | 45839363 | rs11684301 | PRKCE | p21 | 0.200 | 0.680 |
| SNP_A-8504792 | 2 | 45840123 | rs4952769  | PRKCE | p21 | 0.431 | 0.641 |
| SNP_A-2244510 | 2 | 45842527 | rs7582320  | PRKCE | p21 | 0.340 | 0.429 |
| SNP_A-8408275 | 2 | 45848267 | rs4413199  | PRKCE | p21 | 0.080 | 0.982 |
| SNP_A-8581574 | 2 | 45848685 | rs3924521  | PRKCE | p21 | 0.096 | 0.554 |
| SNP_A-8582745 | 2 | 45850161 | rs13401638 | PRKCE | p21 | 0.218 | 0.125 |
| SNP_A-8309551 | 2 | 45850713 | rs13404751 | PRKCE | p21 | 0.297 | 0.525 |
| SNP_A-4277706 | 2 | 45850915 | rs13404973 | PRKCE | p21 | 0.221 | 0.168 |
| SNP_A-8714505 | 2 | 45850930 | rs4953252  | PRKCE | p21 | 0.315 | 0.770 |
| SNP_A-2219885 | 2 | 45851023 | rs13405086 | PRKCE | p21 | 0.219 | 0.136 |
| SNP_A-8301976 | 2 | 45852579 | rs4953253  | PRKCE | p21 | 0.235 | 0.386 |
| SNP_A-1875937 | 2 | 45852620 | rs4952771  | PRKCE | p21 | 0.300 | 0.764 |
| SNP_A-2108482 | 2 | 45853323 | rs7577273  | PRKCE | p21 | 0.366 | 0.271 |
| SNP_A-8479487 | 2 | 45853990 | rs6759058  | PRKCE | p21 | 0.348 | 0.195 |
| SNP_A-8582710 | 2 | 45854287 | rs13002562 | PRKCE | p21 | 0.350 | 0.143 |
| SNP_A-8641157 | 2 | 45854929 | rs6734661  | PRKCE | p21 | 0.072 | 0.468 |
| SNP_A-8312164 | 2 | 45855664 | rs6753292  | PRKCE | p21 | 0.263 | 0.052 |
| SNP_A-1794832 | 2 | 45857497 | rs4953254  | PRKCE | p21 | 0.178 | 0.202 |
| SNP_A-8573028 | 2 | 45869139 | rs4074080  | PRKCE | p21 | 0.338 | 0.326 |
| SNP_A-1781277 | 2 | 45869355 | rs7558342  | PRKCE | p21 | 0.482 | 0.215 |
| SNP_A-8520228 | 2 | 45871106 | rs10170073 | PRKCE | p21 | 0.424 | 0.381 |
| SNP_A-8594886 | 2 | 45871727 | rs11898074 | PRKCE | p21 | 0.429 | 0.335 |
| SNP_A-8674210 | 2 | 45880405 | rs6743144  | PRKCE | p21 | 0.484 | 0.341 |
| SNP_A-8542134 | 2 | 45880921 | rs12617104 | PRKCE | p21 | 0.299 | 0.554 |
| SNP_A-8483671 | 2 | 45881611 | rs10164633 | PRKCE | p21 | 0.216 | 0.637 |
| SNP_A-8585356 | 2 | 45883745 | rs3923011  | PRKCE | p21 | 0.214 | 0.502 |
| SNP_A-4252437 | 2 | 45887102 | rs7591885  | PRKCE | p21 | 0.476 | 0.325 |
| SNP_A-8538858 | 2 | 45888916 | rs11125033 | PRKCE | p21 | 0.309 | 0.855 |
| SNP_A-8703923 | 2 | 45892305 | rs4296473  | PRKCE | p21 | 0.113 | 0.219 |
| SNP_A-4300528 | 2 | 45892651 | rs7593800  | PRKCE | p21 | 0.194 | 0.462 |
| SNP_A-2267629 | 2 | 45894297 | rs4953262  | PRKCE | p21 | 0.464 | 0.229 |
| SNP_A-1963027 | 2 | 45895982 | rs3886870  | PRKCE | p21 | 0.273 | 0.402 |
| SNP_A-2023222 | 2 | 45899463 | rs935672   | PRKCE | p21 | 0.414 | 0.604 |
| SNP_A-8449097 | 2 | 45902949 | rs11125034 | PRKCE | p21 | 0.116 | 0.603 |
| SNP_A-8446713 | 2 | 45903353 | rs7559151  | PRKCE | p21 | 0.095 | 0.804 |
| SNP_A-1869964 | 2 | 45904125 | rs10179954 | PRKCE | p21 | 0.375 | 0.719 |
| SNP_A-8573029 | 2 | 45908642 | rs2345182  | PRKCE | p21 | 0.468 | 0.921 |
| SNP_A-8573031 | 2 | 45908861 | rs935661   | PRKCE | p21 | 0.463 | 0.703 |
| SNP_A-8377223 | 2 | 45909158 | rs935658   | PRKCE | p21 | 0.467 | 0.991 |
| SNP_A-2077622 | 2 | 45910006 | rs10865208 | PRKCE | p21 | 0.461 | 0.786 |
| SNP_A-8379997 | 2 | 45916054 | rs6738409  | PRKCE | p21 | 0.499 | 0.687 |
| SNP_A-8497909 | 2 | 45917834 | rs2345624  | PRKCE | p21 | 0.483 | 0.581 |
| SNP_A-1926317 | 2 | 45918361 | rs935656   | PRKCE | p21 | 0.159 | 0.267 |
| SNP_A-8704542 | 2 | 45918460 | rs2005270  | PRKCE | p21 | 0.401 | 0.451 |
| SNP_A-4253571 | 2 | 45918603 | rs2005271  | PRKCE | p21 | 0.441 | 0.794 |
| SNP_A-4293707 | 2 | 45918963 | rs2345625  | PRKCE | p21 | 0.424 | 0.441 |
| SNP_A-4205971 | 2 | 45919740 | rs6732900  | PRKCE | p21 | 0.425 | 0.934 |
| SNP_A-2153034 | 2 | 45926828 | rs4953269  | PRKCE | p21 | 0.111 | 0.805 |
| SNP_A-8385114 | 2 | 45926900 | rs6761356  | PRKCE | p21 | 0.285 | 0.553 |
| SNP_A-8499302 | 2 | 45927156 | rs4953270  | PRKCE | p21 | 0.432 | 0.790 |
| SNP_A-2057618 | 2 | 45927221 | rs6719779  | PRKCE | p21 | 0.316 | 0.125 |
| SNP_A-4292842 | 2 | 45927600 | rs4952782  | PRKCE | p21 | 0.257 | 0.880 |
| SNP_A-2098853 | 2 | 45928191 | rs7593255  | PRKCE | p21 | 0.246 | 0.041 |
| SNP_A-2055057 | 2 | 45930542 | rs10166692 | PRKCE | p21 | 0.258 | 0.690 |
| SNP_A-8688859 | 2 | 45931007 | rs6756452  | PRKCE | p21 | 0.111 | 0.872 |
| SNP_A-2092484 | 2 | 45931967 | rs6760363  | PRKCE | p21 | 0.399 | 0.957 |
| SNP_A-8571210 | 2 | 45933732 | rs11890282 | PRKCE | p21 | 0.277 | 0.481 |
| SNP_A-2297143 | 2 | 45936374 | rs4953273  | PRKCE | p21 | 0.131 | 0.887 |
| SNP_A-8548632 | 2 | 45936556 | rs4953275  | PRKCE | p21 | 0.218 | 0.190 |
| SNP_A-8456389 | 2 | 45941377 | rs1992932  | PRKCE | p21 | 0.313 | 0.156 |
| SNP_A-8327248 | 2 | 45941409 | rs12465045 | PRKCE | p21 | 0.137 | 0.855 |
| SNP_A-2087913 | 2 | 45941456 | rs1992933  | PRKCE | p21 | 0.084 | 0.917 |
| SNP_A-8548738 | 2 | 45941939 | rs935652   | PRKCE | p21 | 0.066 | 0.853 |

|               |   |          |            |       |     |       |       |
|---------------|---|----------|------------|-------|-----|-------|-------|
| SNP_A-8692595 | 2 | 45944783 | rs10181963 | PRKCE | p21 | 0.214 | 0.068 |
| SNP_A-4303647 | 2 | 45944962 | rs4953279  | PRKCE | p21 | 0.422 | 0.801 |
| SNP_A-2218802 | 2 | 45947264 | rs10189339 | PRKCE | p21 | 0.326 | 0.148 |
| SNP_A-8705554 | 2 | 45947928 | rs4952786  | PRKCE | p21 | 0.151 | 0.783 |
| SNP_A-2154461 | 2 | 45947977 | rs4952787  | PRKCE | p21 | 0.152 | 0.832 |
| SNP_A-8379918 | 2 | 45948309 | rs11125037 | PRKCE | p21 | 0.293 | 0.771 |
| SNP_A-2100671 | 2 | 45949960 | rs11125038 | PRKCE | p21 | 0.327 | 0.363 |
| SNP_A-8351373 | 2 | 45950307 | rs12473396 | PRKCE | p21 | 0.157 | 0.147 |
| SNP_A-2058970 | 2 | 45951401 | rs1966813  | PRKCE | p21 | 0.454 | 0.165 |
| SNP_A-8452206 | 2 | 45955645 | rs12467641 | PRKCE | p21 | 0.233 | 0.463 |
| SNP_A-1923801 | 2 | 45955890 | rs2881068  | PRKCE | p21 | 0.366 | 0.475 |
| SNP_A-1839631 | 2 | 45955956 | rs2345178  | PRKCE | p21 | 0.372 | 0.684 |
| SNP_A-8365718 | 2 | 45960875 | rs4953283  | PRKCE | p21 | 0.359 | 0.444 |
| SNP_A-2193058 | 2 | 45962015 | rs13424270 | PRKCE | p21 | 0.345 | 0.340 |
| SNP_A-1947707 | 2 | 45962449 | rs11125041 | PRKCE | p21 | 0.231 | 0.361 |
| SNP_A-8702919 | 2 | 45963339 | rs935670   | PRKCE | p21 | 0.418 | 0.747 |
| SNP_A-8679037 | 2 | 45963929 | rs735112   | PRKCE | p21 | 0.343 | 0.368 |
| SNP_A-8565862 | 2 | 45966520 | rs2345179  | PRKCE | p21 | 0.402 | 0.990 |
| SNP_A-2292520 | 2 | 45971418 | rs1982366  | PRKCE | p21 | 0.348 | 0.378 |
| SNP_A-8624077 | 2 | 45973894 | rs4953286  | PRKCE | p21 | 0.347 | 0.119 |
| SNP_A-8498808 | 2 | 45974590 | rs13400838 | PRKCE | p21 | 0.066 | 0.642 |
| SNP_A-8330297 | 2 | 45975668 | rs10185201 | PRKCE | p21 | 0.231 | 0.348 |
| SNP_A-2236378 | 2 | 45979475 | rs4953288  | PRKCE | p21 | 0.369 | 0.590 |
| SNP_A-8653561 | 2 | 45979919 | rs4952792  | PRKCE | p21 | 0.373 | 0.574 |
| SNP_A-8707217 | 2 | 45980822 | rs1463163  | PRKCE | p21 | 0.328 | 0.614 |
| SNP_A-8362548 | 2 | 45986364 | rs13015067 | PRKCE | p21 | 0.305 | 0.491 |
| SNP_A-8506174 | 2 | 45986679 | rs1868388  | PRKCE | p21 | 0.434 | 0.740 |
| SNP_A-4284222 | 2 | 45987295 | rs878812   | PRKCE | p21 | 0.300 | 0.458 |
| SNP_A-8455113 | 2 | 45988269 | rs935650   | PRKCE | p21 | 0.296 | 0.262 |
| SNP_A-8547560 | 2 | 45994308 | rs13010241 | PRKCE | p21 | 0.303 | 0.434 |
| SNP_A-8412007 | 2 | 46006618 | rs12986554 | PRKCE | p21 | 0.482 | 0.264 |
| SNP_A-8360270 | 2 | 46009575 | rs6712478  | PRKCE | p21 | 0.239 | 0.209 |
| SNP_A-8604444 | 2 | 46012027 | rs6720958  | PRKCE | p21 | 0.097 | 0.404 |
| SNP_A-1919468 | 2 | 46012194 | rs13036100 | PRKCE | p21 | 0.317 | 0.585 |
| SNP_A-8594195 | 2 | 46016704 | rs6544863  | PRKCE | p21 | 0.390 | 0.586 |
| SNP_A-8311718 | 2 | 46020799 | rs2711300  | PRKCE | p21 | 0.121 | 0.431 |
| SNP_A-2285219 | 2 | 46022083 | rs4953290  | PRKCE | p21 | 0.208 | 0.754 |
| SNP_A-1794308 | 2 | 46022433 | rs2711292  | PRKCE | p21 | 0.209 | 0.771 |
| SNP_A-2121197 | 2 | 46023866 | rs2029087  | PRKCE | p21 | 0.121 | 0.997 |
| SNP_A-8408299 | 2 | 46025740 | rs2711297  | PRKCE | p21 | 0.094 | 0.497 |
| SNP_A-1864406 | 2 | 46026400 | rs2711295  | PRKCE | p21 | 0.089 | 0.657 |
| SNP_A-8471870 | 2 | 46028240 | rs13023787 | PRKCE | p21 | 0.487 | 0.822 |
| SNP_A-4257172 | 2 | 46029907 | rs6750700  | PRKCE | p21 | 0.307 | 0.581 |
| SNP_A-1910466 | 2 | 46030466 | rs6751349  | PRKCE | p21 | 0.145 | 0.536 |
| SNP_A-8654128 | 2 | 46033166 | rs12471357 | PRKCE | p21 | 0.431 | 0.312 |
| SNP_A-4292746 | 2 | 46034497 | rs2711293  | PRKCE | p21 | 0.275 | 0.504 |
| SNP_A-8600405 | 2 | 46036928 | rs2711305  | PRKCE | p21 | 0.498 | 0.276 |
| SNP_A-1856634 | 2 | 46045228 | rs2595201  | PRKCE | p21 | 0.261 | 0.421 |
| SNP_A-8549378 | 2 | 46045487 | rs4953292  | PRKCE | p21 | 0.480 | 0.809 |
| SNP_A-8499092 | 2 | 46045521 | rs2595202  | PRKCE | p21 | 0.186 | 0.664 |
| SNP_A-8472081 | 2 | 46045582 | rs6759301  | PRKCE | p21 | 0.057 | 0.461 |
| SNP_A-8701655 | 2 | 46046851 | rs6706140  | PRKCE | p21 | 0.460 | 0.182 |
| SNP_A-1897346 | 2 | 46054668 | rs1868390  | PRKCE | p21 | 0.243 | 0.514 |
| SNP_A-1808507 | 2 | 46054841 | rs1868392  | PRKCE | p21 | 0.253 | 0.101 |
| SNP_A-4284638 | 2 | 46055842 | rs753572   | PRKCE | p21 | 0.315 | 0.770 |
| SNP_A-1886373 | 2 | 46058824 | rs12464563 | PRKCE | p21 | 0.423 | 0.499 |
| SNP_A-4273239 | 2 | 46061122 | rs7557421  | PRKCE | p21 | 0.078 | 0.683 |
| SNP_A-2113465 | 2 | 46061470 | rs6705717  | PRKCE | p21 | 0.451 | 0.935 |
| SNP_A-2179029 | 2 | 46063632 | rs2711286  | PRKCE | p21 | 0.244 | 0.364 |
| SNP_A-2152332 | 2 | 46065439 | rs2595213  | PRKCE | p21 | 0.235 | 0.289 |
| SNP_A-8621963 | 2 | 46071174 | rs2595214  | PRKCE | p21 | 0.194 | 0.865 |
| SNP_A-8308128 | 2 | 46074392 | rs2711302  | PRKCE | p21 | 0.163 | 0.901 |
| SNP_A-8352791 | 2 | 46075259 | rs12622193 | PRKCE | p21 | 0.277 | 0.891 |
| SNP_A-8611551 | 2 | 46081804 | rs4952796  | PRKCE | p21 | 0.304 | 0.726 |
| SNP_A-1782219 | 2 | 46085546 | rs2255094  | PRKCE | p21 | 0.364 | 0.905 |
| SNP_A-4292771 | 2 | 46085647 | rs2255091  | PRKCE | p21 | 0.157 | 0.912 |
| SNP_A-2251120 | 2 | 46085876 | rs2595222  | PRKCE | p21 | 0.434 | 0.757 |
| SNP_A-1844125 | 2 | 46086885 | rs13016869 | PRKCE | p21 | 0.174 | 0.814 |
| SNP_A-2268227 | 2 | 46087174 | rs11691705 | PRKCE | p21 | 0.177 | 0.532 |
| SNP_A-8329816 | 2 | 46087304 | rs13423410 | PRKCE | p21 | 0.056 | 0.955 |
| SNP_A-4298954 | 2 | 46087623 | rs10211547 | PRKCE | p21 | 0.176 | 0.741 |
| SNP_A-4242082 | 2 | 46088072 | rs10188306 | PRKCE | p21 | 0.178 | 0.679 |
| SNP_A-2182022 | 2 | 46088863 | rs7602129  | PRKCE | p21 | 0.193 | 0.806 |
| SNP_A-2063585 | 2 | 46090545 | rs12465869 | PRKCE | p21 | 0.265 | 0.219 |

|               |   |          |            |       |     |       |       |
|---------------|---|----------|------------|-------|-----|-------|-------|
| SNP_A-8435640 | 2 | 46090713 | rs4953299  | PRKCE | p21 | 0.267 | 0.442 |
| SNP_A-8690263 | 2 | 46098684 | rs7593128  | PRKCE | p21 | 0.399 | 0.426 |
| SNP_A-2146316 | 2 | 46108254 | rs13003856 | PRKCE | p21 | 0.452 | 0.560 |
| SNP_A-4287456 | 2 | 46109903 | rs10167883 | PRKCE | p21 | 0.170 | 0.286 |
| SNP_A-1843184 | 2 | 46112445 | rs11903923 | PRKCE | p21 | 0.139 | 0.499 |
| SNP_A-2257131 | 2 | 46113359 | rs7573407  | PRKCE | p21 | 0.404 | 0.314 |
| SNP_A-8353442 | 2 | 46114320 | rs6544869  | PRKCE | p21 | 0.439 | 0.891 |
| SNP_A-4246084 | 2 | 46127972 | rs7563379  | PRKCE | p21 | 0.408 | 0.405 |
| SNP_A-8383980 | 2 | 46128167 | rs6712036  | PRKCE | p21 | 0.416 | 0.397 |
| SNP_A-2006347 | 2 | 46130026 | rs6748375  | PRKCE | p21 | 0.443 | 0.465 |
| SNP_A-2311276 | 2 | 46131427 | rs12712960 | PRKCE | p21 | 0.207 | 0.125 |
| SNP_A-8564674 | 2 | 46138804 | rs13001074 | PRKCE | p21 | 0.245 | 0.503 |
| SNP_A-8644491 | 2 | 46141058 | rs12989656 | PRKCE | p21 | 0.260 | 0.327 |
| SNP_A-8701552 | 2 | 46141247 | rs6751805  | PRKCE | p21 | 0.207 | 0.274 |
| SNP_A-8383761 | 2 | 46141357 | rs6723478  | PRKCE | p21 | 0.058 | 0.945 |
| SNP_A-8709799 | 2 | 46143920 | rs921183   | PRKCE | p21 | 0.155 | 0.210 |
| SNP_A-8541938 | 2 | 46146949 | rs13405039 | PRKCE | p21 | 0.112 | 0.941 |
| SNP_A-8484624 | 2 | 46148315 | rs12712962 | PRKCE | p21 | 0.469 | 0.707 |
| SNP_A-1833415 | 2 | 46148485 | rs12712963 | PRKCE | p21 | 0.384 | 0.670 |
| SNP_A-8605587 | 2 | 46151346 | rs6742625  | PRKCE | p21 | 0.376 | 0.960 |
| SNP_A-1813901 | 2 | 46152617 | rs7598174  | PRKCE | p21 | 0.209 | 0.213 |
| SNP_A-8406687 | 2 | 46159906 | rs2084428  | PRKCE | p21 | 0.283 | 0.756 |
| SNP_A-2159638 | 2 | 46164805 | rs11125048 | PRKCE | p21 | 0.355 | 0.406 |
| SNP_A-4289329 | 2 | 46170608 | rs1868273  | PRKCE | p21 | 0.260 | 0.064 |
| SNP_A-1850422 | 2 | 46170799 | rs1868272  | PRKCE | p21 | 0.261 | 0.201 |
| SNP_A-2231388 | 2 | 46170852 | rs1868271  | PRKCE | p21 | 0.289 | 0.186 |
| SNP_A-8509283 | 2 | 46173184 | rs3768759  | PRKCE | p21 | 0.156 | 0.214 |
| SNP_A-8640495 | 2 | 46173506 | rs3768758  | PRKCE | p21 | 0.125 | 0.872 |
| SNP_A-8573032 | 2 | 46174235 | rs2345953  | PRKCE | p21 | 0.351 | 0.847 |
| SNP_A-1963028 | 2 | 46174384 | rs2345955  | PRKCE | p21 | 0.178 | 0.211 |
| SNP_A-2305505 | 2 | 46174837 | rs10202504 | PRKCE | p21 | 0.177 | 0.138 |
| SNP_A-8316189 | 2 | 46175944 | rs4953307  | PRKCE | p21 | 0.288 | 0.205 |
| SNP_A-8567919 | 2 | 46176455 | rs13024886 | PRKCE | p21 | 0.391 | 0.872 |
| SNP_A-8365676 | 2 | 46180173 | rs3754574  | PRKCE | p21 | 0.285 | 0.166 |
| SNP_A-8331681 | 2 | 46180247 | rs3754573  | PRKCE | p21 | 0.288 | 0.145 |
| SNP_A-8416000 | 2 | 46181682 | rs4953313  | PRKCE | p21 | 0.284 | 0.126 |
| SNP_A-2221572 | 2 | 46198849 | rs12616328 | PRKCE | p21 | 0.193 | 0.428 |
| SNP_A-2164393 | 2 | 46200220 | rs3768751  | PRKCE | p21 | 0.267 | 0.151 |
| SNP_A-8414110 | 2 | 46200318 | rs6719520  | PRKCE | p21 | 0.102 | 0.137 |
| SNP_A-8461212 | 2 | 46200527 | rs3768750  | PRKCE | p21 | 0.264 | 0.144 |
| SNP_A-8608564 | 2 | 46201110 | rs4952800  | PRKCE | p21 | 0.259 | 0.186 |
| SNP_A-1848141 | 2 | 46201296 | rs2218660  | PRKCE | p21 | 0.267 | 0.091 |
| SNP_A-1963031 | 2 | 46205562 | rs3768747  | PRKCE | p21 | 0.317 | 0.375 |
| SNP_A-1963032 | 2 | 46205830 | rs17799476 | PRKCE | p21 | 0.173 | 0.483 |
| SNP_A-8573033 | 2 | 46205957 | rs3754569  | PRKCE | p21 | 0.436 | 0.363 |
| SNP_A-8573034 | 2 | 46206003 | rs10495927 | PRKCE | p21 | 0.303 | 0.911 |
| SNP_A-8692703 | 2 | 46210637 | rs17737768 | PRKCE | p21 | 0.110 | 0.828 |
| SNP_A-8550770 | 2 | 46216181 | rs10198247 | PRKCE | p21 | 0.263 | 0.728 |
| SNP_A-8471311 | 2 | 46219424 | rs12992366 | PRKCE | p21 | 0.082 | 0.544 |
| SNP_A-1959365 | 2 | 46221800 | rs4952803  | PRKCE | p21 | 0.076 | 0.769 |
| SNP_A-8643703 | 2 | 46223000 | rs7563086  | PRKCE | p21 | 0.073 | 0.304 |
| SNP_A-2040701 | 2 | 46224718 | rs3754568  | PRKCE | p21 | 0.471 | 0.597 |
| SNP_A-8292568 | 2 | 46225227 | rs11690238 | PRKCE | p21 | 0.171 | 0.744 |
| SNP_A-1906052 | 2 | 46225258 | rs6544873  | PRKCE | p21 | 0.074 | 0.807 |
| SNP_A-4261902 | 2 | 46225678 | rs10495929 | PRKCE | p21 | 0.140 | 0.093 |
| SNP_A-1963035 | 2 | 46226779 | rs1020445  | PRKCE | p21 | 0.320 | 0.022 |
| SNP_A-4261903 | 2 | 46227033 | rs7604415  | PRKCE | p21 | 0.083 | 0.709 |
| SNP_A-2279112 | 2 | 46236903 | rs4953321  | PRKCE | p21 | 0.352 | 0.785 |
| SNP_A-1909192 | 2 | 46237684 | rs3754566  | PRKCE | p21 | 0.137 | 0.387 |
| SNP_A-1920555 | 2 | 46239475 | rs6742742  | PRKCE | p21 | 0.061 | 0.368 |
| SNP_A-2075653 | 2 | 46239802 | rs2034360  | PRKCE | p21 | 0.153 | 0.447 |
| SNP_A-1952633 | 2 | 46250099 | rs11690929 | PRKCE | p21 | 0.133 | 0.725 |
| SNP_A-8573035 | 2 | 46251135 | rs951012   | PRKCE | p21 | 0.284 | 0.993 |
| SNP_A-8628854 | 2 | 46252070 | rs281479   | PRKCE | p21 | 0.071 | 0.195 |
| SNP_A-1786227 | 2 | 46257341 | rs281472   | PRKCE | p21 | 0.075 | 0.149 |
| SNP_A-2027087 | 2 | 46257393 | rs281471   | PRKCE | p21 | 0.061 | 0.369 |
| SNP_A-4198300 | 2 | 46258349 | rs10210199 | PRKCE | p21 | 0.182 | 0.881 |
| SNP_A-2024817 | 2 | 46259338 | rs281469   | PRKCE | p21 | 0.183 | 0.479 |
| SNP_A-8487754 | 2 | 46261198 | rs281467   | PRKCE | p21 | 0.186 | 0.866 |
| SNP_A-2210573 | 2 | 46261432 | rs1448219  | PRKCE | p21 | 0.064 | 0.306 |
| SNP_A-8435627 | 2 | 46261575 | rs2594489  | PRKCE | p21 | 0.364 | 0.767 |
| SNP_A-1936910 | 2 | 46261844 | rs2594491  | PRKCE | p21 | 0.490 | 0.439 |
| SNP_A-8418906 | 2 | 46261925 | rs2594492  | PRKCE | p21 | 0.489 | 0.272 |
| SNP_A-1963036 | 2 | 46264711 | rs281508   | PRKCE | p21 | 0.284 | 0.826 |

|               |   |           |            |          |        |       |       |
|---------------|---|-----------|------------|----------|--------|-------|-------|
| SNP_A-2263538 | 2 | 101687072 | rs17809691 | MAP4K4   | q11.2  | 0.309 | 0.576 |
| SNP_A-8470241 | 2 | 101689196 | rs6734799  | MAP4K4   | q11.2  | 0.281 | 0.856 |
| SNP_A-2224053 | 2 | 101717462 | rs7597661  | MAP4K4   | q11.2  | 0.063 | 0.752 |
| SNP_A-2069713 | 2 | 101726355 | rs4384813  | MAP4K4   | q11.2  | 0.078 | 0.876 |
| SNP_A-8400129 | 2 | 101733994 | rs17810475 | MAP4K4   | q11.2  | 0.311 | 0.659 |
| SNP_A-8517670 | 2 | 101741391 | rs11123901 | MAP4K4   | q11.2  | 0.333 | 0.763 |
| SNP_A-1828557 | 2 | 101763395 | rs11683001 | MAP4K4   | q11.2  | 0.292 | 0.429 |
| SNP_A-8648410 | 2 | 101779018 | rs6543095  | MAP4K4   | q11.2  | 0.076 | 0.742 |
| SNP_A-8661331 | 2 | 101781569 | rs11887131 | MAP4K4   | q11.2  | 0.064 | 0.739 |
| SNP_A-2155959 | 2 | 101788410 | rs6732726  | MAP4K4   | q11.2  | 0.294 | 0.363 |
| SNP_A-4196055 | 2 | 101796069 | rs17026143 | MAP4K4   | q11.2  | 0.060 | 0.395 |
| SNP_A-8454396 | 2 | 101805268 | rs875565   | MAP4K4   | q11.2  | 0.309 | 0.576 |
| SNP_A-8575777 | 2 | 101810253 | rs2236936  | MAP4K4   | q11.2  | 0.324 | 0.646 |
| SNP_A-8575778 | 2 | 101810474 | rs2236935  | MAP4K4   | q11.2  | 0.243 | 0.758 |
| SNP_A-2274480 | 2 | 101829006 | rs17802002 | MAP4K4   | q11.2  | 0.146 | 0.063 |
| SNP_A-4208258 | 2 | 101832572 | rs10489973 | MAP4K4   | q11.2  | 0.144 | 0.043 |
| SNP_A-1918300 | 2 | 101834055 | rs2158816  | MAP4K4   | q11.2  | 0.462 | 0.559 |
| SNP_A-8306451 | 2 | 101844784 | rs13425874 | MAP4K4   | q11.2  | 0.064 | 0.726 |
| SNP_A-8451358 | 2 | 101845461 | rs3771903  | MAP4K4   | q11.2  | 0.464 | 0.601 |
| SNP_A-2236284 | 2 | 101862349 | rs4851507  | MAP4K4   | q11.2  | 0.471 | 0.569 |
| SNP_A-4208259 | 2 | 101870995 | rs11895969 | MAP4K4   | q11.2  | 0.062 | 0.786 |
| SNP_A-4279539 | 2 | 101872136 | rs7574674  | MAP4K4   | q11.2  | 0.076 | 0.805 |
| SNP_A-4235988 | 2 | 127787473 | rs6731176  | MAP3K2   | q14.3  | 0.438 | 0.552 |
| SNP_A-1811257 | 3 | 48762223  | rs6791542  | PRKAR2A  | p21.31 | 0.359 | 0.444 |
| SNP_A-1894572 | 3 | 48812186  | rs9859473  | PRKAR2A  | p21.31 | 0.246 | 0.375 |
| SNP_A-8716957 | 3 | 49877164  | rs2883059  | CAMKV    | p21.31 | 0.380 | 0.583 |
| SNP_A-4281355 | 3 | 50626755  | rs873985   | MAPKAPK3 | p21.31 | 0.136 | 0.619 |
| SNP_A-2237373 | 3 | 50645082  | rs2040397  | MAPKAPK3 | p21.31 | 0.283 | 0.187 |
| SNP_A-8700373 | 3 | 50659815  | rs11711534 | MAPKAPK3 | p21.31 | 0.066 | 0.279 |
| SNP_A-2272004 | 3 | 53174054  | rs1483185  | PRKCD    | p21.1  | 0.145 | 0.985 |
| SNP_A-1888152 | 3 | 53174120  | rs1483186  | PRKCD    | p21.1  | 0.114 | 0.672 |
| SNP_A-8319598 | 3 | 53176938  | rs750170   | PRKCD    | p21.1  | 0.150 | 0.344 |
| SNP_A-8402522 | 3 | 53183957  | rs3821689  | PRKCD    | p21.1  | 0.352 | 0.296 |
| SNP_A-1954339 | 3 | 53187756  | rs17052826 | PRKCD    | p21.1  | 0.157 | 0.589 |
| SNP_A-8295445 | 3 | 53188697  | rs2230493  | PRKCD    | p21.1  | 0.160 | 0.708 |
| SNP_A-2097191 | 3 | 53191732  | rs13084863 | PRKCD    | p21.1  | 0.484 | 0.483 |
| SNP_A-8519453 | 3 | 171430600 | rs1082969  | PRKCI    | q26.2  | 0.177 | 0.352 |
| SNP_A-2039928 | 3 | 171441246 | rs1684885  | PRKCI    | q26.2  | 0.184 | 0.194 |
| SNP_A-8421754 | 3 | 171454775 | rs2650229  | PRKCI    | q26.2  | 0.197 | 0.206 |
| SNP_A-4199928 | 3 | 171473104 | rs2140825  | PRKCI    | q26.2  | 0.374 | 0.229 |
| SNP_A-8516417 | 3 | 171505189 | rs2650220  | PRKCI    | q26.2  | 0.179 | 0.117 |
| SNP_A-2031710 | 3 | 186505879 | rs9875687  | MAP3K13  | q27.2  | 0.162 | 0.577 |
| SNP_A-4261414 | 3 | 186508583 | rs6779106  | MAP3K13  | q27.2  | 0.214 | 0.826 |
| SNP_A-2042951 | 3 | 186509681 | rs9830680  | MAP3K13  | q27.2  | 0.164 | 0.891 |
| SNP_A-2026229 | 3 | 186512797 | rs7631503  | MAP3K13  | q27.2  | 0.164 | 0.917 |
| SNP_A-4279123 | 3 | 186514488 | rs7431357  | MAP3K13  | q27.2  | 0.163 | 0.845 |
| SNP_A-8306082 | 3 | 186525017 | rs12639437 | MAP3K13  | q27.2  | 0.096 | 0.048 |
| SNP_A-8549560 | 3 | 186531008 | rs7432658  | MAP3K13  | q27.2  | 0.214 | 0.362 |
| SNP_A-8443302 | 3 | 186535467 | rs9871486  | MAP3K13  | q27.2  | 0.169 | 0.613 |
| SNP_A-2298462 | 3 | 186545134 | rs6444052  | MAP3K13  | q27.2  | 0.405 | 0.269 |
| SNP_A-8391906 | 3 | 186560578 | rs12492085 | MAP3K13  | q27.2  | 0.189 | 0.293 |
| SNP_A-4275982 | 3 | 186573513 | rs9847739  | MAP3K13  | q27.2  | 0.383 | 0.371 |
| SNP_A-8352138 | 3 | 186581213 | rs13076191 | MAP3K13  | q27.2  | 0.293 | 0.861 |
| SNP_A-2208974 | 3 | 186584193 | rs12163582 | MAP3K13  | q27.2  | 0.257 | 0.836 |
| SNP_A-2093375 | 3 | 186587758 | rs6444062  | MAP3K13  | q27.2  | 0.071 | 0.491 |
| SNP_A-1845462 | 3 | 186594994 | rs4687296  | MAP3K13  | q27.2  | 0.224 | 0.841 |
| SNP_A-1858626 | 3 | 186606110 | rs6803944  | MAP3K13  | q27.2  | 0.155 | 0.973 |
| SNP_A-1842085 | 3 | 186607301 | rs9842230  | MAP3K13  | q27.2  | 0.162 | 0.399 |
| SNP_A-8560253 | 3 | 186617799 | rs7646178  | MAP3K13  | q27.2  | 0.153 | 0.897 |
| SNP_A-8357664 | 3 | 186623829 | rs12490248 | MAP3K13  | q27.2  | 0.069 | 0.228 |
| SNP_A-8364346 | 3 | 186634807 | rs1017501  | MAP3K13  | q27.2  | 0.286 | 0.397 |
| SNP_A-2208154 | 3 | 186638176 | rs2304815  | MAP3K13  | q27.2  | 0.162 | 0.158 |
| SNP_A-4289058 | 3 | 186645679 | rs12053946 | MAP3K13  | q27.2  | 0.104 | 0.468 |
| SNP_A-8447463 | 3 | 186663506 | rs9878704  | MAP3K13  | q27.2  | 0.130 | 0.397 |
| SNP_A-8566075 | 3 | 186666776 | rs13095772 | MAP3K13  | q27.2  | 0.095 | 0.116 |
| SNP_A-4210268 | 4 | 71147663  | rs3775745  | CSN3     | q13.3  | 0.400 | 0.244 |
| SNP_A-1977526 | 4 | 71148222  | rs10518071 | CSN3     | q13.3  | 0.159 | 0.418 |
| SNP_A-8531795 | 4 | 71149545  | rs1048152  | CSN3     | q13.3  | 0.080 | 0.557 |
| SNP_A-8332095 | 4 | 71149832  | rs3775737  | CSN3     | q13.3  | 0.106 | 0.425 |
| SNP_A-8461131 | 4 | 71149921  | rs3822164  | CSN3     | q13.3  | 0.161 | 0.397 |
| SNP_A-1877976 | 4 | 71150849  | rs41508150 | CSN3     | q13.3  | 0.158 | 0.299 |
| SNP_A-1931763 | 4 | 71151123  | rs13141970 | CSN3     | q13.3  | 0.238 | 0.799 |
| SNP_A-1818187 | 4 | 71151212  | rs41523244 | CSN3     | q13.3  | 0.158 | 0.289 |
| SNP_A-8463788 | 4 | 87156898  | rs958      | MAPK10   | q21.3  | 0.197 | 0.039 |

|               |   |           |            |        |       |       |       |
|---------------|---|-----------|------------|--------|-------|-------|-------|
| SNP_A-2244414 | 4 | 87165708  | rs3775168  | MAPK10 | q21.3 | 0.183 | 0.523 |
| SNP_A-2105720 | 4 | 87172931  | rs6848433  | MAPK10 | q21.3 | 0.117 | 0.587 |
| SNP_A-8569188 | 4 | 87173891  | rs3775173  | MAPK10 | q21.3 | 0.141 | 0.834 |
| SNP_A-4297480 | 4 | 87182808  | rs4351013  | MAPK10 | q21.3 | 0.177 | 0.448 |
| SNP_A-2129317 | 4 | 87184667  | rs10033283 | MAPK10 | q21.3 | 0.113 | 0.714 |
| SNP_A-1977930 | 4 | 87185127  | rs6810413  | MAPK10 | q21.3 | 0.418 | 0.504 |
| SNP_A-8363883 | 4 | 87189425  | rs17008675 | MAPK10 | q21.3 | 0.172 | 0.619 |
| SNP_A-2248883 | 4 | 87194086  | rs17011341 | MAPK10 | q21.3 | 0.113 | 0.714 |
| SNP_A-8316838 | 4 | 87202256  | rs3775187  | MAPK10 | q21.3 | 0.419 | 0.437 |
| SNP_A-2262246 | 4 | 87230328  | rs4482754  | MAPK10 | q21.3 | 0.416 | 0.461 |
| SNP_A-1840361 | 4 | 87233830  | rs12502934 | MAPK10 | q21.3 | 0.418 | 0.414 |
| SNP_A-8409777 | 4 | 87238262  | rs9884770  | MAPK10 | q21.3 | 0.416 | 0.352 |
| SNP_A-8323126 | 4 | 87240962  | rs12644947 | MAPK10 | q21.3 | 0.365 | 0.887 |
| SNP_A-8641574 | 4 | 87248708  | rs12647176 | MAPK10 | q21.3 | 0.161 | 0.585 |
| SNP_A-8466205 | 4 | 87256403  | rs5006575  | MAPK10 | q21.3 | 0.142 | 0.426 |
| SNP_A-4260434 | 4 | 87268401  | rs4546235  | MAPK10 | q21.3 | 0.317 | 0.142 |
| SNP_A-1799957 | 4 | 87283699  | rs4693757  | MAPK10 | q21.3 | 0.143 | 0.825 |
| SNP_A-8430016 | 4 | 87291488  | rs4334746  | MAPK10 | q21.3 | 0.319 | 0.883 |
| SNP_A-1787687 | 4 | 87293056  | rs10001480 | MAPK10 | q21.3 | 0.164 | 0.499 |
| SNP_A-1853382 | 4 | 87293272  | rs10024003 | MAPK10 | q21.3 | 0.155 | 0.785 |
| SNP_A-8662194 | 4 | 87318361  | rs2199308  | MAPK10 | q21.3 | 0.194 | 0.745 |
| SNP_A-1977931 | 4 | 87323194  | rs10516769 | MAPK10 | q21.3 | 0.124 | 0.884 |
| SNP_A-1977932 | 4 | 87326932  | rs1460767  | MAPK10 | q21.3 | 0.292 | 0.645 |
| SNP_A-2071922 | 4 | 87327534  | rs7668374  | MAPK10 | q21.3 | 0.211 | 0.893 |
| SNP_A-2044365 | 4 | 87356659  | rs10026060 | MAPK10 | q21.3 | 0.153 | 0.454 |
| SNP_A-8590056 | 4 | 87357762  | rs12650052 | MAPK10 | q21.3 | 0.135 | 0.928 |
| SNP_A-1812112 | 4 | 87357789  | rs10029339 | MAPK10 | q21.3 | 0.219 | 0.696 |
| SNP_A-2009966 | 4 | 87366528  | rs6827698  | MAPK10 | q21.3 | 0.218 | 0.786 |
| SNP_A-2135450 | 4 | 87385929  | rs17011584 | MAPK10 | q21.3 | 0.136 | 0.842 |
| SNP_A-8662195 | 4 | 87391122  | rs10516770 | MAPK10 | q21.3 | 0.065 | 0.337 |
| SNP_A-8662196 | 4 | 87401460  | rs9307016  | MAPK10 | q21.3 | 0.153 | 0.660 |
| SNP_A-8463636 | 4 | 87403238  | rs6531914  | MAPK10 | q21.3 | 0.277 | 0.459 |
| SNP_A-8330548 | 4 | 87427125  | rs17011659 | MAPK10 | q21.3 | 0.114 | 0.413 |
| SNP_A-8323506 | 4 | 87440504  | rs6827098  | MAPK10 | q21.3 | 0.370 | 0.412 |
| SNP_A-8518424 | 4 | 87440851  | rs17449015 | MAPK10 | q21.3 | 0.090 | 0.977 |
| SNP_A-8472385 | 4 | 87442492  | rs1460753  | MAPK10 | q21.3 | 0.369 | 0.329 |
| SNP_A-2265728 | 4 | 87462364  | rs6856688  | MAPK10 | q21.3 | 0.153 | 0.454 |
| SNP_A-2244713 | 4 | 87466341  | rs9994931  | MAPK10 | q21.3 | 0.239 | 0.902 |
| SNP_A-2101945 | 4 | 87471283  | rs4693142  | MAPK10 | q21.3 | 0.239 | 0.892 |
| SNP_A-8687155 | 4 | 87471821  | rs7677400  | MAPK10 | q21.3 | 0.122 | 0.721 |
| SNP_A-8676896 | 4 | 87475230  | rs17409904 | MAPK10 | q21.3 | 0.482 | 0.273 |
| SNP_A-8440185 | 4 | 87475280  | rs17409925 | MAPK10 | q21.3 | 0.270 | 0.110 |
| SNP_A-4240279 | 4 | 87475647  | rs6825707  | MAPK10 | q21.3 | 0.228 | 0.620 |
| SNP_A-4224821 | 4 | 87478030  | rs4611890  | MAPK10 | q21.3 | 0.490 | 0.231 |
| SNP_A-8469663 | 4 | 87478062  | rs2869431  | MAPK10 | q21.3 | 0.270 | 0.105 |
| SNP_A-4279963 | 4 | 87481803  | rs11097106 | MAPK10 | q21.3 | 0.231 | 0.802 |
| SNP_A-8713050 | 4 | 87482275  | rs17011756 | MAPK10 | q21.3 | 0.395 | 0.738 |
| SNP_A-2261773 | 4 | 87485320  | rs4693765  | MAPK10 | q21.3 | 0.240 | 0.934 |
| SNP_A-1862859 | 4 | 87485480  | rs4693766  | MAPK10 | q21.3 | 0.238 | 0.842 |
| SNP_A-2101504 | 4 | 87488367  | rs11097109 | MAPK10 | q21.3 | 0.237 | 0.940 |
| SNP_A-2188621 | 4 | 87493198  | rs17451111 | MAPK10 | q21.3 | 0.341 | 0.332 |
| SNP_A-8662200 | 4 | 87509948  | rs2869438  | PTPN13 | q21.3 | 0.242 | 0.718 |
| SNP_A-8390131 | 4 | 87516818  | rs17011843 | PTPN13 | q21.3 | 0.150 | 0.483 |
| SNP_A-1977938 | 4 | 87522688  | rs9307018  | PTPN13 | q21.3 | 0.394 | 0.635 |
| SNP_A-2083303 | 4 | 87559754  | rs11938088 | PTPN13 | q21.3 | 0.186 | 0.490 |
| SNP_A-8700436 | 4 | 87581858  | rs4488910  | PTPN13 | q21.3 | 0.140 | 0.330 |
| SNP_A-8647612 | 4 | 87588087  | rs12503051 | PTPN13 | q21.3 | 0.150 | 0.501 |
| SNP_A-8366082 | 4 | 87597820  | rs4693770  | PTPN13 | q21.3 | 0.113 | 0.753 |
| SNP_A-8478575 | 4 | 87608141  | rs7658485  | PTPN13 | q21.3 | 0.373 | 0.167 |
| SNP_A-1843910 | 4 | 87632205  | rs9683663  | PTPN13 | q21.3 | 0.272 | 0.561 |
| SNP_A-2258439 | 4 | 87632448  | rs2869441  | PTPN13 | q21.3 | 0.142 | 0.139 |
| SNP_A-8622649 | 4 | 87633587  | rs17418801 | PTPN13 | q21.3 | 0.273 | 0.683 |
| SNP_A-1977939 | 4 | 87636315  | rs6838659  | PTPN13 | q21.3 | 0.328 | 0.639 |
| SNP_A-8646069 | 4 | 87643363  | rs4640633  | PTPN13 | q21.3 | 0.332 | 0.824 |
| SNP_A-8548526 | 4 | 87653746  | rs4552430  | PTPN13 | q21.3 | 0.324 | 0.617 |
| SNP_A-8663293 | 4 | 114603777 | rs17620390 | CAMK2D | q26   | 0.242 | 0.341 |
| SNP_A-8663294 | 4 | 114610853 | rs6835747  | CAMK2D | q26   | 0.145 | 0.528 |
| SNP_A-8663295 | 4 | 114611842 | rs916874   | CAMK2D | q26   | 0.292 | 0.902 |
| SNP_A-1978573 | 4 | 114612078 | rs6842886  | CAMK2D | q26   | 0.174 | 0.634 |
| SNP_A-2075048 | 4 | 114613293 | rs17629820 | CAMK2D | q26   | 0.063 | 0.778 |
| SNP_A-1955210 | 4 | 114620118 | rs4834340  | CAMK2D | q26   | 0.381 | 0.736 |
| SNP_A-8580743 | 4 | 114624559 | rs11936225 | CAMK2D | q26   | 0.142 | 0.619 |
| SNP_A-8612434 | 4 | 114636045 | rs2158196  | CAMK2D | q26   | 0.493 | 0.227 |
| SNP_A-2054194 | 4 | 114636070 | rs2158197  | CAMK2D | q26   | 0.466 | 0.521 |

|               |   |           |            |        |       |       |       |
|---------------|---|-----------|------------|--------|-------|-------|-------|
| SNP_A-8396214 | 4 | 114637591 | rs757174   | CAMK2D | q26   | 0.474 | 0.502 |
| SNP_A-1919560 | 4 | 114641161 | rs17446453 | CAMK2D | q26   | 0.238 | 0.379 |
| SNP_A-4210464 | 4 | 114645147 | rs7684265  | CAMK2D | q26   | 0.106 | 0.977 |
| SNP_A-2069735 | 4 | 114645383 | rs4834347  | CAMK2D | q26   | 0.229 | 0.205 |
| SNP_A-2030907 | 4 | 114648856 | rs11098193 | CAMK2D | q26   | 0.232 | 0.240 |
| SNP_A-2033497 | 4 | 114651522 | rs17046126 | CAMK2D | q26   | 0.299 | 0.321 |
| SNP_A-1959757 | 4 | 114651703 | rs17630012 | CAMK2D | q26   | 0.062 | 0.786 |
| SNP_A-1825329 | 4 | 114655326 | rs3815072  | CAMK2D | q26   | 0.141 | 0.956 |
| SNP_A-1954201 | 4 | 114656174 | rs13146211 | CAMK2D | q26   | 0.260 | 0.979 |
| SNP_A-2290032 | 4 | 114672173 | rs4240286  | CAMK2D | q26   | 0.439 | 0.220 |
| SNP_A-8405706 | 4 | 114697931 | rs11724156 | CAMK2D | q26   | 0.250 | 0.573 |
| SNP_A-8309838 | 4 | 114698102 | rs11728021 | CAMK2D | q26   | 0.154 | 0.314 |
| SNP_A-4224250 | 4 | 114700740 | rs17630328 | CAMK2D | q26   | 0.076 | 0.621 |
| SNP_A-8701995 | 4 | 114706327 | rs7673652  | CAMK2D | q26   | 0.055 | 0.148 |
| SNP_A-1914742 | 4 | 114715426 | rs10009286 | CAMK2D | q26   | 0.320 | 0.423 |
| SNP_A-2183689 | 4 | 114715574 | rs13144613 | CAMK2D | q26   | 0.348 | 0.971 |
| SNP_A-1978576 | 4 | 114718478 | rs6533700  | CAMK2D | q26   | 0.254 | 0.447 |
| SNP_A-1978578 | 4 | 114719604 | rs13122281 | CAMK2D | q26   | 0.280 | 0.617 |
| SNP_A-8448606 | 4 | 114721072 | rs13130904 | CAMK2D | q26   | 0.093 | 0.522 |
| SNP_A-8704161 | 4 | 114721621 | rs7666890  | CAMK2D | q26   | 0.279 | 0.639 |
| SNP_A-1845850 | 4 | 114723041 | rs11946664 | CAMK2D | q26   | 0.301 | 0.127 |
| SNP_A-1978579 | 4 | 114723610 | rs17531554 | CAMK2D | q26   | 0.142 | 0.139 |
| SNP_A-1978580 | 4 | 114723767 | rs10488894 | CAMK2D | q26   | 0.298 | 0.140 |
| SNP_A-2205611 | 4 | 114726451 | rs2214392  | CAMK2D | q26   | 0.302 | 0.128 |
| SNP_A-2039515 | 4 | 114727378 | rs1859148  | CAMK2D | q26   | 0.254 | 0.515 |
| SNP_A-4245136 | 4 | 114729956 | rs7675804  | CAMK2D | q26   | 0.254 | 0.549 |
| SNP_A-2133337 | 4 | 114730973 | rs1859150  | CAMK2D | q26   | 0.306 | 0.079 |
| SNP_A-2119867 | 4 | 114731586 | rs17531701 | CAMK2D | q26   | 0.109 | 0.081 |
| SNP_A-2290555 | 4 | 114732225 | rs6533701  | CAMK2D | q26   | 0.301 | 0.182 |
| SNP_A-2244351 | 4 | 114732247 | rs6821520  | CAMK2D | q26   | 0.087 | 0.064 |
| SNP_A-8663298 | 4 | 114754172 | rs10488958 | CAMK2D | q26   | 0.249 | 0.476 |
| SNP_A-4203624 | 4 | 114762663 | rs6826859  | CAMK2D | q26   | 0.147 | 0.169 |
| SNP_A-2194314 | 4 | 114762869 | rs1047187  | CAMK2D | q26   | 0.222 | 0.410 |
| SNP_A-8637708 | 4 | 114763632 | rs7676656  | CAMK2D | q26   | 0.496 | 0.137 |
| SNP_A-1796746 | 4 | 114763744 | rs7676842  | CAMK2D | q26   | 0.367 | 0.842 |
| SNP_A-2137247 | 4 | 114764439 | rs35507223 | CAMK2D | q26   | 0.104 | 0.459 |
| SNP_A-4301589 | 4 | 114766138 | rs10000775 | CAMK2D | q26   | 0.500 | 0.171 |
| SNP_A-4221121 | 4 | 114766153 | rs10023113 | CAMK2D | q26   | 0.133 | 0.016 |
| SNP_A-2129233 | 4 | 114772042 | rs6853484  | CAMK2D | q26   | 0.074 | 0.807 |
| SNP_A-4252491 | 4 | 114773599 | rs28599641 | CAMK2D | q26   | 0.072 | 0.639 |
| SNP_A-8485051 | 4 | 114779263 | rs2189368  | CAMK2D | q26   | 0.066 | 0.081 |
| SNP_A-1978582 | 4 | 114779992 | rs17630766 | CAMK2D | q26   | 0.139 | 0.750 |
| SNP_A-1978583 | 4 | 114781182 | rs10488959 | CAMK2D | q26   | 0.078 | 0.221 |
| SNP_A-8663302 | 4 | 114798695 | rs6533705  | CAMK2D | q26   | 0.196 | 0.227 |
| SNP_A-4299652 | 4 | 114799352 | rs7680434  | CAMK2D | q26   | 0.079 | 0.085 |
| SNP_A-2289715 | 4 | 114805249 | rs2107172  | CAMK2D | q26   | 0.418 | 0.404 |
| SNP_A-8475119 | 4 | 114807037 | rs1016311  | CAMK2D | q26   | 0.065 | 0.278 |
| SNP_A-8564920 | 4 | 114810138 | rs11098198 | CAMK2D | q26   | 0.319 | 0.175 |
| SNP_A-8690635 | 4 | 114812915 | rs1011973  | CAMK2D | q26   | 0.496 | 0.146 |
| SNP_A-8663303 | 4 | 114828167 | rs2214457  | CAMK2D | q26   | 0.058 | 0.448 |
| SNP_A-8376876 | 4 | 114838051 | rs987694   | CAMK2D | q26   | 0.379 | 0.308 |
| SNP_A-4218908 | 4 | 114838837 | rs12508566 | CAMK2D | q26   | 0.382 | 0.264 |
| SNP_A-2261036 | 4 | 114839372 | rs17593296 | CAMK2D | q26   | 0.160 | 0.079 |
| SNP_A-1935977 | 4 | 114840997 | rs10461194 | CAMK2D | q26   | 0.384 | 0.270 |
| SNP_A-2185672 | 4 | 114841279 | rs7687511  | CAMK2D | q26   | 0.081 | 0.983 |
| SNP_A-2074656 | 4 | 114850796 | rs2040742  | CAMK2D | q26   | 0.082 | 0.949 |
| SNP_A-2056157 | 4 | 114851657 | rs17431684 | CAMK2D | q26   | 0.081 | 0.983 |
| SNP_A-8541141 | 4 | 114853112 | rs7662404  | CAMK2D | q26   | 0.370 | 0.365 |
| SNP_A-1908116 | 4 | 114853816 | rs12644009 | CAMK2D | q26   | 0.380 | 0.208 |
| SNP_A-8552803 | 4 | 114881130 | rs1859229  | CAMK2D | q26   | 0.252 | 0.273 |
| SNP_A-8706648 | 4 | 114886784 | rs11933418 | CAMK2D | q26   | 0.441 | 0.453 |
| SNP_A-1978584 | 4 | 114890405 | rs6836139  | CAMK2D | q26   | 0.416 | 0.946 |
| SNP_A-8663305 | 4 | 114891292 | rs6812422  | CAMK2D | q26   | 0.352 | 0.665 |
| SNP_A-8453521 | 5 | 40818671  | rs3805494  | PRKAA1 | p13.1 | 0.259 | 0.772 |
| SNP_A-2174147 | 5 | 40826308  | rs10074991 | PRKAA1 | p13.1 | 0.282 | 0.720 |
| SNP_A-1981401 | 5 | 40827641  | rs13361707 | PRKAA1 | p13.1 | 0.272 | 0.380 |
| SNP_A-8348158 | 5 | 40827910  | rs3805490  | PRKAA1 | p13.1 | 0.259 | 0.883 |
| SNP_A-2148064 | 5 | 56149199  | rs1423622  | MAP3K1 | q11.2 | 0.087 | 0.098 |
| SNP_A-4223221 | 5 | 56149607  | rs832552   | MAP3K1 | q11.2 | 0.378 | 0.096 |
| SNP_A-4283943 | 5 | 56150793  | rs832554   | MAP3K1 | q11.2 | 0.174 | 0.628 |
| SNP_A-2193407 | 5 | 56151842  | rs252902   | MAP3K1 | q11.2 | 0.176 | 0.764 |
| SNP_A-1981662 | 5 | 56154490  | rs252904   | MAP3K1 | q11.2 | 0.175 | 0.777 |
| SNP_A-1981663 | 5 | 56154632  | rs252905   | MAP3K1 | q11.2 | 0.372 | 0.101 |
| SNP_A-1981664 | 5 | 56154947  | rs252906   | MAP3K1 | q11.2 | 0.375 | 0.171 |



|               |   |           |            |        |       |       |       |
|---------------|---|-----------|------------|--------|-------|-------|-------|
| SNP_A-1981665 | 5 | 56157511  | rs252915   | MAP3K1 | q11.2 | 0.175 | 0.777 |
| SNP_A-8525153 | 5 | 56158101  | rs16886364 | MAP3K1 | q11.2 | 0.062 | 0.681 |
| SNP_A-4225141 | 5 | 56164756  | rs863840   | MAP3K1 | q11.2 | 0.182 | 0.700 |
| SNP_A-1863183 | 5 | 56175003  | rs16886403 | MAP3K1 | q11.2 | 0.129 | 0.193 |
| SNP_A-1981667 | 5 | 56185186  | rs860580   | MAP3K1 | q11.2 | 0.176 | 0.764 |
| SNP_A-2165477 | 5 | 56187501  | rs832566   | MAP3K1 | q11.2 | 0.373 | 0.131 |
| SNP_A-4236112 | 5 | 56193708  | rs2113079  | MAP3K1 | q11.2 | 0.176 | 0.741 |
| SNP_A-1917357 | 5 | 56197544  | rs832575   | MAP3K1 | q11.2 | 0.120 | 0.664 |
| SNP_A-1981669 | 5 | 56206570  | rs16886448 | MAP3K1 | q11.2 | 0.064 | 0.749 |
| SNP_A-2266319 | 5 | 56214969  | rs832584   | MAP3K1 | q11.2 | 0.177 | 0.728 |
| SNP_A-8616379 | 5 | 56222832  | rs860579   | MAP3K1 | q11.2 | 0.057 | 0.469 |
| SNP_A-1880422 | 5 | 68691891  | rs6450035  | TAF9   | q13.2 | 0.086 | 0.190 |
| SNP_A-8584394 | 5 | 68692083  | rs2010352  | TAF9   | q13.2 | 0.429 | 0.226 |
| SNP_A-1982915 | 5 | 110590399 | rs727922   | CAMK4  | q22.1 | 0.244 | 0.982 |
| SNP_A-8478745 | 5 | 110591764 | rs10077974 | CAMK4  | q22.1 | 0.074 | 0.839 |
| SNP_A-8510417 | 5 | 110595497 | rs1457115  | CAMK4  | q22.1 | 0.456 | 0.800 |
| SNP_A-8665943 | 5 | 110596357 | rs9285875  | CAMK4  | q22.1 | 0.257 | 0.686 |
| SNP_A-4211168 | 5 | 110596399 | rs9326832  | CAMK4  | q22.1 | 0.270 | 0.413 |
| SNP_A-1813210 | 5 | 110598075 | rs17461314 | CAMK4  | q22.1 | 0.271 | 0.947 |
| SNP_A-8362268 | 5 | 110607340 | rs2052859  | CAMK4  | q22.1 | 0.334 | 0.748 |
| SNP_A-8456671 | 5 | 110608846 | rs11241111 | CAMK4  | q22.1 | 0.284 | 0.204 |
| SNP_A-8665944 | 5 | 110613526 | rs712645   | CAMK4  | q22.1 | 0.453 | 0.360 |
| SNP_A-8665945 | 5 | 110614073 | rs389402   | CAMK4  | q22.1 | 0.440 | 0.810 |
| SNP_A-8550588 | 5 | 110614337 | rs7726469  | CAMK4  | q22.1 | 0.175 | 0.094 |
| SNP_A-8328625 | 5 | 110619629 | rs1650796  | CAMK4  | q22.1 | 0.271 | 0.378 |
| SNP_A-1799126 | 5 | 110625639 | rs10040249 | CAMK4  | q22.1 | 0.193 | 0.117 |
| SNP_A-8509812 | 5 | 110629622 | rs1644496  | CAMK4  | q22.1 | 0.468 | 0.762 |
| SNP_A-2235314 | 5 | 110633954 | rs1618689  | CAMK4  | q22.1 | 0.261 | 0.685 |
| SNP_A-2251301 | 5 | 110634040 | rs2288397  | CAMK4  | q22.1 | 0.194 | 0.107 |
| SNP_A-1866514 | 5 | 110673099 | rs306082   | CAMK4  | q22.1 | 0.099 | 0.668 |
| SNP_A-1982917 | 5 | 110683306 | rs306079   | CAMK4  | q22.1 | 0.416 | 0.352 |
| SNP_A-1900904 | 5 | 110694303 | rs1644505  | CAMK4  | q22.1 | 0.464 | 0.660 |
| SNP_A-2186047 | 5 | 110696315 | rs2560495  | CAMK4  | q22.1 | 0.425 | 0.911 |
| SNP_A-8652063 | 5 | 110696599 | rs1650782  | CAMK4  | q22.1 | 0.464 | 0.579 |
| SNP_A-1822244 | 5 | 110705949 | rs375359   | CAMK4  | q22.1 | 0.379 | 0.467 |
| SNP_A-2011137 | 5 | 110707556 | rs446176   | CAMK4  | q22.1 | 0.120 | 0.764 |
| SNP_A-1982919 | 5 | 110707772 | rs387238   | CAMK4  | q22.1 | 0.418 | 0.852 |
| SNP_A-2143720 | 5 | 110712386 | rs422558   | CAMK4  | q22.1 | 0.118 | 0.814 |
| SNP_A-4211169 | 5 | 110714128 | rs434256   | CAMK4  | q22.1 | 0.120 | 0.743 |
| SNP_A-8621975 | 5 | 110716145 | rs534608   | CAMK4  | q22.1 | 0.119 | 0.780 |
| SNP_A-1841051 | 5 | 110717621 | rs387551   | CAMK4  | q22.1 | 0.118 | 0.806 |
| SNP_A-8712021 | 5 | 110718462 | rs376880   | CAMK4  | q22.1 | 0.119 | 0.799 |
| SNP_A-8665946 | 5 | 110720611 | rs689253   | CAMK4  | q22.1 | 0.427 | 0.616 |
| SNP_A-1982920 | 5 | 110721911 | rs365212   | CAMK4  | q22.1 | 0.119 | 0.772 |
| SNP_A-4265117 | 5 | 110723657 | rs960452   | CAMK4  | q22.1 | 0.384 | 0.500 |
| SNP_A-2246001 | 5 | 110729426 | rs450315   | CAMK4  | q22.1 | 0.117 | 0.562 |
| SNP_A-2011138 | 5 | 110730506 | rs388944   | CAMK4  | q22.1 | 0.112 | 0.492 |
| SNP_A-8504443 | 5 | 110731528 | rs1470168  | CAMK4  | q22.1 | 0.429 | 0.789 |
| SNP_A-1931308 | 5 | 110731617 | rs438178   | CAMK4  | q22.1 | 0.116 | 0.369 |
| SNP_A-1852217 | 5 | 110751259 | rs306109   | CAMK4  | q22.1 | 0.097 | 0.536 |
| SNP_A-1940325 | 5 | 110751280 | rs306108   | CAMK4  | q22.1 | 0.108 | 0.596 |
| SNP_A-8470356 | 5 | 110754871 | rs421357   | CAMK4  | q22.1 | 0.422 | 0.411 |
| SNP_A-8475606 | 5 | 110755928 | rs410859   | CAMK4  | q22.1 | 0.417 | 0.409 |
| SNP_A-1872495 | 5 | 110756516 | rs396835   | CAMK4  | q22.1 | 0.117 | 0.562 |
| SNP_A-4265118 | 5 | 110758456 | rs523389   | CAMK4  | q22.1 | 0.107 | 0.416 |
| SNP_A-4193918 | 5 | 110761539 | rs17133238 | CAMK4  | q22.1 | 0.387 | 0.374 |
| SNP_A-8665951 | 5 | 110769615 | rs10515428 | CAMK4  | q22.1 | 0.432 | 0.256 |
| SNP_A-8665952 | 5 | 110770337 | rs6892625  | CAMK4  | q22.1 | 0.113 | 0.277 |
| SNP_A-8586320 | 5 | 110787436 | rs10052530 | CAMK4  | q22.1 | 0.422 | 0.684 |
| SNP_A-2164855 | 5 | 110791508 | rs4957949  | CAMK4  | q22.1 | 0.365 | 0.130 |
| SNP_A-8451556 | 5 | 110791945 | rs10045295 | CAMK4  | q22.1 | 0.375 | 0.086 |
| SNP_A-8655553 | 5 | 110792151 | rs10039731 | CAMK4  | q22.1 | 0.412 | 0.417 |
| SNP_A-1982922 | 5 | 110798955 | rs1820666  | CAMK4  | q22.1 | 0.295 | 0.654 |
| SNP_A-4157790 | 5 | 110800303 | rs10491334 | CAMK4  | q22.1 | 0.173 | 0.333 |
| SNP_A-1982923 | 5 | 110800619 | rs759950   | CAMK4  | q22.1 | 0.394 | 0.227 |
| SNP_A-4211170 | 5 | 110800828 | rs759949   | CAMK4  | q22.1 | 0.402 | 0.388 |
| SNP_A-4211171 | 5 | 110800841 | rs759948   | CAMK4  | q22.1 | 0.374 | 0.188 |
| SNP_A-4211172 | 5 | 110800999 | rs759947   | CAMK4  | q22.1 | 0.402 | 0.388 |
| SNP_A-1982924 | 5 | 110801072 | rs7736139  | CAMK4  | q22.1 | 0.250 | 0.124 |
| SNP_A-1945603 | 5 | 110801356 | rs11241123 | CAMK4  | q22.1 | 0.401 | 0.498 |
| SNP_A-1982925 | 5 | 110801595 | rs4957951  | CAMK4  | q22.1 | 0.389 | 0.121 |
| SNP_A-4211173 | 5 | 110802124 | rs9326835  | CAMK4  | q22.1 | 0.292 | 0.169 |
| SNP_A-8656721 | 5 | 110802842 | rs10066487 | CAMK4  | q22.1 | 0.209 | 0.065 |
| SNP_A-8637287 | 5 | 110805439 | rs31328    | CAMK4  | q22.1 | 0.197 | 0.077 |

|               |   |           |            |        |        |       |       |
|---------------|---|-----------|------------|--------|--------|-------|-------|
| SNP_A-8697091 | 5 | 110808194 | rs4957952  | CAMK4  | q22.1  | 0.473 | 0.785 |
| SNP_A-2296065 | 5 | 110809436 | rs17458552 | CAMK4  | q22.1  | 0.348 | 0.187 |
| SNP_A-2154125 | 5 | 110814621 | rs1897528  | CAMK4  | q22.1  | 0.427 | 0.616 |
| SNP_A-8563300 | 5 | 110815528 | rs971193   | CAMK4  | q22.1  | 0.427 | 0.801 |
| SNP_A-4217621 | 5 | 110815887 | rs31317    | CAMK4  | q22.1  | 0.097 | 0.563 |
| SNP_A-2207027 | 5 | 110815911 | rs17536705 | CAMK4  | q22.1  | 0.307 | 0.581 |
| SNP_A-8351774 | 5 | 110822269 | rs2268944  | CAMK4  | q22.1  | 0.424 | 0.481 |
| SNP_A-1982926 | 5 | 110840940 | rs31623    | CAMK4  | q22.1  | 0.125 | 0.913 |
| SNP_A-8595498 | 5 | 110841556 | rs10055516 | CAMK4  | q22.1  | 0.462 | 0.555 |
| SNP_A-1950005 | 5 | 149585309 | rs4958469  | CAMK2A | q33.1  | 0.277 | 0.136 |
| SNP_A-4289261 | 5 | 149585404 | rs4958468  | CAMK2A | q33.1  | 0.063 | 0.318 |
| SNP_A-2227932 | 5 | 149585481 | rs4958467  | CAMK2A | q33.1  | 0.267 | 0.104 |
| SNP_A-8356150 | 5 | 149586941 | rs10051644 | CAMK2A | q33.1  | 0.285 | 0.824 |
| SNP_A-8714035 | 5 | 149590165 | rs1549913  | CAMK2A | q33.1  | 0.413 | 0.929 |
| SNP_A-2107044 | 5 | 149595874 | rs10066581 | CAMK2A | q33.1  | 0.125 | 0.185 |
| SNP_A-4197534 | 5 | 149595967 | rs17111079 | CAMK2A | q33.1  | 0.099 | 0.689 |
| SNP_A-8707384 | 5 | 149618553 | rs4958445  | CAMK2A | q33.1  | 0.271 | 0.802 |
| SNP_A-8497551 | 5 | 149620473 | rs882282   | CAMK2A | q33.1  | 0.100 | 0.957 |
| SNP_A-4265298 | 5 | 149621348 | rs3822606  | CAMK2A | q33.1  | 0.274 | 0.906 |
| SNP_A-2250584 | 5 | 149637560 | rs34087853 | CAMK2A | q33.1  | 0.263 | 0.571 |
| SNP_A-4242123 | 5 | 149640783 | rs6881743  | CAMK2A | q33.1  | 0.260 | 0.780 |
| SNP_A-1899345 | 5 | 149641142 | rs10050608 | CAMK2A | q33.1  | 0.244 | 0.800 |
| SNP_A-4300146 | 5 | 149641346 | rs1432833  | CAMK2A | q33.1  | 0.243 | 0.929 |
| SNP_A-2236390 | 5 | 149647471 | rs4958869  | CAMK2A | q33.1  | 0.250 | 0.925 |
| SNP_A-2011492 | 5 | 179596220 | rs6601104  | MAPK9  | q35.3  | 0.424 | 0.365 |
| SNP_A-1804851 | 5 | 179602877 | rs4639174  | MAPK9  | q35.3  | 0.161 | 0.555 |
| SNP_A-8511864 | 5 | 179603134 | rs7445806  | MAPK9  | q35.3  | 0.426 | 0.122 |
| SNP_A-2153896 | 5 | 179609267 | rs11743623 | MAPK9  | q35.3  | 0.073 | 0.176 |
| SNP_A-1863786 | 5 | 179609585 | rs13190345 | MAPK9  | q35.3  | 0.073 | 0.445 |
| SNP_A-8541998 | 5 | 179610123 | rs4147385  | MAPK9  | q35.3  | 0.218 | 0.175 |
| SNP_A-8652370 | 5 | 179612366 | rs6863088  | MAPK9  | q35.3  | 0.306 | 0.763 |
| SNP_A-8358377 | 5 | 179612839 | rs11249687 | MAPK9  | q35.3  | 0.080 | 0.285 |
| SNP_A-8607959 | 5 | 179615099 | rs6874413  | MAPK9  | q35.3  | 0.415 | 0.737 |
| SNP_A-2023565 | 5 | 179626784 | rs17627880 | MAPK9  | q35.3  | 0.231 | 0.492 |
| SNP_A-8681017 | 5 | 179630108 | rs3095944  | MAPK9  | q35.3  | 0.322 | 0.570 |
| SNP_A-8520884 | 5 | 179637509 | rs730688   | MAPK9  | q35.3  | 0.259 | 0.182 |
| SNP_A-8443507 | 5 | 179641502 | rs3812066  | MAPK9  | q35.3  | 0.200 | 0.122 |
| SNP_A-8584040 | 5 | 179644666 | rs6867398  | MAPK9  | q35.3  | 0.266 | 0.283 |
| SNP_A-2261079 | 6 | 36110440  | rs16883860 | MAPK14 | p21.31 | 0.090 | 0.140 |
| SNP_A-2031867 | 6 | 36114198  | rs851023   | MAPK14 | p21.31 | 0.124 | 0.207 |
| SNP_A-8670790 | 6 | 36127205  | rs664367   | MAPK14 | p21.31 | 0.476 | 0.985 |
| SNP_A-1985684 | 6 | 36127314  | rs17714205 | MAPK14 | p21.31 | 0.127 | 0.462 |
| SNP_A-1985685 | 6 | 36143332  | rs2237093  | MAPK14 | p21.31 | 0.101 | 0.407 |
| SNP_A-2154502 | 6 | 36165946  | rs16884628 | MAPK14 | p21.31 | 0.096 | 0.897 |
| SNP_A-8536609 | 6 | 36170969  | rs7771484  | MAPK14 | p21.31 | 0.091 | 0.325 |
| SNP_A-2011706 | 6 | 36176281  | rs7761118  | MAPK14 | p21.31 | 0.091 | 1.000 |
| SNP_A-2046777 | 6 | 36179495  | rs16884919 | MAPK14 | p21.31 | 0.096 | 0.897 |
| SNP_A-8414404 | 6 | 36183888  | rs12530381 | MAPK14 | p21.31 | 0.482 | 0.723 |
| SNP_A-2108498 | 6 | 36184912  | rs3804452  | MAPK14 | p21.31 | 0.129 | 0.557 |
| SNP_A-4292466 | 6 | 36208710  | rs2071864  | MAPK13 | p21.31 | 0.292 | 0.359 |
| SNP_A-4255072 | 6 | 91288073  | rs3799917  | MAP3K7 | q15    | 0.312 | 0.669 |
| SNP_A-1838284 | 6 | 91288700  | rs205339   | MAP3K7 | q15    | 0.258 | 0.817 |
| SNP_A-1986819 | 6 | 91295724  | rs150125   | MAP3K7 | q15    | 0.256 | 0.728 |
| SNP_A-4290463 | 6 | 91304421  | rs1144159  | MAP3K7 | q15    | 0.195 | 0.402 |
| SNP_A-8527867 | 6 | 91305464  | rs3799912  | MAP3K7 | q15    | 0.122 | 0.030 |
| SNP_A-2101372 | 6 | 91305939  | rs205352   | MAP3K7 | q15    | 0.261 | 0.423 |
| SNP_A-8670822 | 6 | 91306072  | rs205351   | MAP3K7 | q15    | 0.263 | 0.914 |
| SNP_A-2022236 | 6 | 91310473  | rs1145728  | MAP3K7 | q15    | 0.340 | 0.254 |
| SNP_A-2260776 | 6 | 91313649  | rs2273567  | MAP3K7 | q15    | 0.313 | 0.399 |
| SNP_A-2116248 | 6 | 91336830  | rs1143794  | MAP3K7 | q15    | 0.340 | 0.207 |
| SNP_A-1936150 | 6 | 122839383 | rs9388077  | PKIB   | q22.31 | 0.149 | 0.674 |
| SNP_A-4248540 | 6 | 122842031 | rs9375140  | PKIB   | q22.31 | 0.135 | 0.977 |
| SNP_A-8317720 | 6 | 122842681 | rs544099   | PKIB   | q22.31 | 0.282 | 0.526 |
| SNP_A-2178910 | 6 | 122845811 | rs561470   | PKIB   | q22.31 | 0.434 | 0.218 |
| SNP_A-8499664 | 6 | 122853798 | rs9398675  | PKIB   | q22.31 | 0.078 | 0.685 |
| SNP_A-1816529 | 6 | 122873901 | rs9490464  | PKIB   | q22.31 | 0.150 | 0.726 |
| SNP_A-2303880 | 6 | 122894532 | rs9385257  | PKIB   | q22.31 | 0.148 | 0.638 |
| SNP_A-1821815 | 6 | 122898087 | rs9320876  | PKIB   | q22.31 | 0.149 | 0.610 |
| SNP_A-4193548 | 6 | 122920535 | rs197687   | PKIB   | q22.31 | 0.322 | 0.343 |
| SNP_A-8669574 | 6 | 122929254 | rs9375150  | PKIB   | q22.31 | 0.431 | 0.319 |
| SNP_A-4250066 | 6 | 122938979 | rs9398678  | PKIB   | q22.31 | 0.141 | 0.466 |
| SNP_A-8538077 | 6 | 122963824 | rs9385261  | PKIB   | q22.31 | 0.135 | 0.349 |
| SNP_A-8513513 | 6 | 122968759 | rs13191198 | PKIB   | q22.31 | 0.436 | 0.349 |
| SNP_A-8331254 | 6 | 122976860 | rs9388103  | PKIB   | q22.31 | 0.118 | 0.856 |

|               |   |           |            |        |        |       |       |
|---------------|---|-----------|------------|--------|--------|-------|-------|
| SNP_A-8414613 | 6 | 122979068 | rs17675201 | PKIB   | q22.31 | 0.262 | 0.149 |
| SNP_A-4256312 | 6 | 122979112 | rs17084655 | PKIB   | q22.31 | 0.171 | 0.396 |
| SNP_A-8413789 | 6 | 122979311 | rs9320884  | PKIB   | q22.31 | 0.307 | 0.816 |
| SNP_A-8357044 | 6 | 122979482 | rs9401561  | PKIB   | q22.31 | 0.298 | 0.730 |
| SNP_A-2281448 | 6 | 122991608 | rs6914480  | PKIB   | q22.31 | 0.390 | 0.863 |
| SNP_A-2153510 | 6 | 123001204 | rs17084680 | PKIB   | q22.31 | 0.292 | 0.640 |
| SNP_A-2269731 | 6 | 123008805 | rs2566833  | PKIB   | q22.31 | 0.319 | 0.108 |
| SNP_A-2240713 | 6 | 123009857 | rs13215891 | PKIB   | q22.31 | 0.064 | 0.320 |
| SNP_A-4161855 | 6 | 123010110 | rs1430815  | PKIB   | q22.31 | 0.331 | 0.702 |
| SNP_A-8378945 | 6 | 123015131 | rs13193040 | PKIB   | q22.31 | 0.330 | 0.614 |
| SNP_A-8676901 | 6 | 123019230 | rs9401564  | PKIB   | q22.31 | 0.113 | 0.753 |
| SNP_A-2248031 | 6 | 123022210 | rs7752438  | PKIB   | q22.31 | 0.330 | 0.658 |
| SNP_A-8704114 | 6 | 123022258 | rs17052989 | PKIB   | q22.31 | 0.093 | 0.432 |
| SNP_A-2257821 | 6 | 123024190 | rs11154103 | PKIB   | q22.31 | 0.292 | 0.645 |
| SNP_A-8669575 | 6 | 123040291 | rs7769704  | PKIB   | q22.31 | 0.336 | 0.920 |
| SNP_A-8549719 | 6 | 123043202 | rs11961403 | PKIB   | q22.31 | 0.050 | 0.661 |
| SNP_A-8426515 | 6 | 123044547 | rs2195686  | PKIB   | q22.31 | 0.313 | 0.218 |
| SNP_A-8557792 | 6 | 123047594 | rs7452823  | PKIB   | q22.31 | 0.374 | 0.145 |
| SNP_A-8443248 | 6 | 123047932 | rs7742077  | PKIB   | q22.31 | 0.276 | 0.981 |
| SNP_A-8298972 | 6 | 123065781 | rs17733717 | PKIB   | q22.31 | 0.207 | 0.538 |
| SNP_A-8413187 | 6 | 123065908 | rs17084747 | PKIB   | q22.31 | 0.082 | 0.321 |
| SNP_A-8605757 | 6 | 123069560 | rs9482269  | PKIB   | q22.31 | 0.249 | 0.637 |
| SNP_A-8458646 | 6 | 123073087 | rs9490529  | PKIB   | q22.31 | 0.242 | 0.687 |
| SNP_A-8515793 | 6 | 123073201 | rs9375168  | PKIB   | q22.31 | 0.471 | 0.971 |
| SNP_A-2124839 | 6 | 123074897 | rs4945708  | PKIB   | q22.31 | 0.219 | 0.731 |
| SNP_A-1987473 | 6 | 123076204 | rs7760232  | PKIB   | q22.31 | 0.090 | 0.647 |
| SNP_A-1800633 | 6 | 123082761 | rs9375170  | PKIB   | q22.31 | 0.277 | 0.991 |
| SNP_A-8660247 | 6 | 123088621 | rs1132635  | PKIB   | q22.31 | 0.394 | 0.428 |
| SNP_A-8689321 | 6 | 123088715 | rs1132643  | PKIB   | q22.31 | 0.369 | 0.529 |
| SNP_A-8382438 | 6 | 136920854 | rs9376201  | MAP3K5 | q23.3  | 0.149 | 0.396 |
| SNP_A-8557386 | 6 | 136929885 | rs13193586 | MAP3K5 | q23.3  | 0.076 | 0.363 |
| SNP_A-2035854 | 6 | 136932767 | rs9389405  | MAP3K5 | q23.3  | 0.155 | 0.739 |
| SNP_A-1883415 | 6 | 136937159 | rs2237263  | MAP3K5 | q23.3  | 0.149 | 0.372 |
| SNP_A-8346751 | 6 | 136949281 | rs9389409  | MAP3K5 | q23.3  | 0.157 | 0.327 |
| SNP_A-8581961 | 6 | 136949309 | rs9402827  | MAP3K5 | q23.3  | 0.153 | 0.281 |
| SNP_A-8671491 | 6 | 136950935 | rs2327743  | MAP3K5 | q23.3  | 0.172 | 0.921 |
| SNP_A-1987788 | 6 | 136951357 | rs760862   | MAP3K5 | q23.3  | 0.170 | 0.811 |
| SNP_A-8671492 | 6 | 136951409 | rs760863   | MAP3K5 | q23.3  | 0.172 | 0.738 |
| SNP_A-8393818 | 6 | 136981511 | rs9321564  | MAP3K5 | q23.3  | 0.209 | 0.810 |
| SNP_A-2297858 | 6 | 136994623 | rs2237268  | MAP3K5 | q23.3  | 0.373 | 0.667 |
| SNP_A-4252549 | 6 | 136999357 | rs2064205  | MAP3K5 | q23.3  | 0.400 | 0.703 |
| SNP_A-8546991 | 6 | 137001971 | rs6917580  | MAP3K5 | q23.3  | 0.375 | 0.826 |
| SNP_A-8637302 | 6 | 137005186 | rs9494547  | MAP3K5 | q23.3  | 0.058 | 0.162 |
| SNP_A-8566105 | 6 | 137005747 | rs9494549  | MAP3K5 | q23.3  | 0.057 | 0.979 |
| SNP_A-8306367 | 6 | 137008312 | rs2237269  | MAP3K5 | q23.3  | 0.154 | 0.473 |
| SNP_A-8712155 | 6 | 137010234 | rs2237271  | MAP3K5 | q23.3  | 0.187 | 0.888 |
| SNP_A-1987789 | 6 | 137011307 | rs6922031  | MAP3K5 | q23.3  | 0.131 | 0.564 |
| SNP_A-8671493 | 6 | 137011546 | rs1997703  | MAP3K5 | q23.3  | 0.191 | 0.916 |
| SNP_A-2285911 | 6 | 137016799 | rs6910459  | MAP3K5 | q23.3  | 0.056 | 0.114 |
| SNP_A-8566604 | 6 | 137019261 | rs2076260  | MAP3K5 | q23.3  | 0.175 | 0.161 |
| SNP_A-2109564 | 6 | 137020933 | rs1011969  | MAP3K5 | q23.3  | 0.165 | 0.734 |
| SNP_A-8686413 | 6 | 137034072 | rs9376221  | MAP3K5 | q23.3  | 0.102 | 0.846 |
| SNP_A-2307700 | 6 | 137036903 | rs9402839  | MAP3K5 | q23.3  | 0.137 | 0.845 |
| SNP_A-8570911 | 6 | 137059442 | rs1009709  | MAP3K5 | q23.3  | 0.487 | 0.313 |
| SNP_A-1987790 | 6 | 137069560 | rs10484491 | MAP3K5 | q23.3  | 0.488 | 0.956 |
| SNP_A-1987791 | 6 | 137074186 | rs6928243  | MAP3K5 | q23.3  | 0.482 | 0.488 |
| SNP_A-2290299 | 6 | 137075399 | rs911185   | MAP3K5 | q23.3  | 0.489 | 0.926 |
| SNP_A-4293367 | 6 | 137083058 | rs1028565  | MAP3K5 | q23.3  | 0.439 | 0.804 |
| SNP_A-8456311 | 6 | 137083526 | rs1321477  | MAP3K5 | q23.3  | 0.442 | 0.863 |
| SNP_A-8346179 | 6 | 137084096 | rs9389429  | MAP3K5 | q23.3  | 0.440 | 0.875 |
| SNP_A-8456865 | 6 | 137084520 | rs11752550 | MAP3K5 | q23.3  | 0.405 | 0.819 |
| SNP_A-8621863 | 6 | 137085713 | rs9376225  | MAP3K5 | q23.3  | 0.450 | 0.841 |
| SNP_A-8646954 | 6 | 137088444 | rs9373173  | MAP3K5 | q23.3  | 0.442 | 0.948 |
| SNP_A-2136241 | 6 | 137089050 | rs9389431  | MAP3K5 | q23.3  | 0.451 | 0.777 |
| SNP_A-1987792 | 6 | 137092247 | rs9285484  | MAP3K5 | q23.3  | 0.450 | 0.661 |
| SNP_A-1987794 | 6 | 137092589 | rs6570091  | MAP3K5 | q23.3  | 0.449 | 0.727 |
| SNP_A-1987796 | 6 | 137099066 | rs9483945  | MAP3K5 | q23.3  | 0.443 | 0.869 |
| SNP_A-8593475 | 6 | 137101396 | rs1570055  | MAP3K5 | q23.3  | 0.440 | 0.963 |
| SNP_A-1899303 | 6 | 137101620 | rs1570056  | MAP3K5 | q23.3  | 0.451 | 0.939 |
| SNP_A-4293648 | 6 | 137101643 | rs11154883 | MAP3K5 | q23.3  | 0.441 | 0.914 |
| SNP_A-4278163 | 6 | 137117703 | rs6925103  | MAP3K5 | q23.3  | 0.475 | 0.792 |
| SNP_A-8610548 | 6 | 137118161 | rs9389436  | MAP3K5 | q23.3  | 0.438 | 0.579 |
| SNP_A-4212005 | 6 | 137120748 | rs7739002  | MAP3K5 | q23.3  | 0.110 | 0.184 |
| SNP_A-4212006 | 6 | 137121235 | rs4896219  | MAP3K5 | q23.3  | 0.473 | 0.785 |

|               |   |           |            |         |       |       |       |
|---------------|---|-----------|------------|---------|-------|-------|-------|
| SNP_A-1834738 | 6 | 137137372 | rs9321570  | MAP3K5  | q23.3 | 0.362 | 0.387 |
| SNP_A-8387100 | 6 | 137140817 | rs11154886 | MAP3K5  | q23.3 | 0.406 | 0.322 |
| SNP_A-1878217 | 6 | 137146486 | rs9494569  | MAP3K5  | q23.3 | 0.360 | 0.684 |
| SNP_A-1921472 | 6 | 137147093 | rs9483947  | MAP3K5  | q23.3 | 0.361 | 0.638 |
| SNP_A-8494420 | 6 | 137153357 | rs4524621  | MAP3K5  | q23.3 | 0.358 | 0.581 |
| SNP_A-8366935 | 6 | 161338632 | rs625977   | MAP3K4  | q26   | 0.176 | 0.417 |
| SNP_A-8430293 | 6 | 161350832 | rs676334   | MAP3K4  | q26   | 0.072 | 0.905 |
| SNP_A-2165494 | 6 | 161361099 | rs6901173  | MAP3K4  | q26   | 0.120 | 0.249 |
| SNP_A-2063579 | 6 | 161363997 | rs6901968  | MAP3K4  | q26   | 0.118 | 0.335 |
| SNP_A-1811965 | 6 | 161364142 | rs6925502  | MAP3K4  | q26   | 0.119 | 0.776 |
| SNP_A-1794881 | 6 | 161364426 | rs9347478  | MAP3K4  | q26   | 0.288 | 0.054 |
| SNP_A-8440350 | 6 | 161369566 | rs13200744 | MAP3K4  | q26   | 0.063 | 0.712 |
| SNP_A-4234478 | 6 | 161370518 | rs9295134  | MAP3K4  | q26   | 0.121 | 0.127 |
| SNP_A-2194093 | 6 | 161378745 | rs9355867  | MAP3K4  | q26   | 0.167 | 0.267 |
| SNP_A-8365727 | 6 | 161378921 | rs3798906  | MAP3K4  | q26   | 0.054 | 0.551 |
| SNP_A-4259240 | 6 | 161379655 | rs6455701  | MAP3K4  | q26   | 0.118 | 0.534 |
| SNP_A-2260798 | 6 | 161380927 | rs1562026  | MAP3K4  | q26   | 0.165 | 0.333 |
| SNP_A-2139946 | 6 | 161381059 | rs1562025  | MAP3K4  | q26   | 0.053 | 0.296 |
| SNP_A-1833979 | 6 | 161382806 | rs1982291  | MAP3K4  | q26   | 0.177 | 0.468 |
| SNP_A-8334055 | 6 | 161386170 | rs2314379  | MAP3K4  | q26   | 0.467 | 0.270 |
| SNP_A-2057506 | 6 | 161394956 | rs12110787 | MAP3K4  | q26   | 0.111 | 0.163 |
| SNP_A-8402560 | 6 | 161398436 | rs1001808  | MAP3K4  | q26   | 0.234 | 0.443 |
| SNP_A-1988383 | 6 | 161407367 | rs3798913  | MAP3K4  | q26   | 0.061 | 0.611 |
| SNP_A-2070848 | 6 | 161415648 | rs9355870  | MAP3K4  | q26   | 0.114 | 0.413 |
| SNP_A-2221460 | 6 | 161416775 | rs6933810  | MAP3K4  | q26   | 0.122 | 0.404 |
| SNP_A-4242464 | 6 | 161417184 | rs4709490  | MAP3K4  | q26   | 0.122 | 0.674 |
| SNP_A-8676867 | 6 | 161418462 | rs9458114  | MAP3K4  | q26   | 0.068 | 0.926 |
| SNP_A-8680015 | 6 | 161419483 | rs13194157 | MAP3K4  | q26   | 0.121 | 0.431 |
| SNP_A-2079555 | 6 | 161419872 | rs4324757  | MAP3K4  | q26   | 0.290 | 0.180 |
| SNP_A-8411783 | 6 | 161422084 | rs9347479  | MAP3K4  | q26   | 0.246 | 0.471 |
| SNP_A-8688426 | 6 | 161423914 | rs6902760  | MAP3K4  | q26   | 0.118 | 0.814 |
| SNP_A-4302400 | 6 | 161426929 | rs9364586  | MAP3K4  | q26   | 0.116 | 0.919 |
| SNP_A-1799928 | 6 | 161428993 | rs9355332  | MAP3K4  | q26   | 0.113 | 0.977 |
| SNP_A-1988384 | 6 | 161429533 | rs1404269  | MAP3K4  | q26   | 0.169 | 0.505 |
| SNP_A-2166112 | 6 | 161436821 | rs3798917  | MAP3K4  | q26   | 0.164 | 0.844 |
| SNP_A-8703844 | 6 | 161446663 | rs1534020  | MAP3K4  | q26   | 0.170 | 0.532 |
| SNP_A-8642149 | 6 | 161453317 | rs1569937  | MAP3K4  | q26   | 0.172 | 0.636 |
| SNP_A-1866423 | 6 | 161454323 | rs9355872  | MAP3K4  | q26   | 0.127 | 0.714 |
| SNP_A-2022921 | 6 | 161458240 | rs1488     | MAP3K4  | q26   | 0.332 | 0.267 |
| SNP_A-8300675 | 7 | 671099    | rs7809325  | PRKAR1B | p22.3 | 0.146 | 0.484 |
| SNP_A-8430489 | 7 | 713443    | rs4415214  | PRKAR1B | p22.3 | 0.407 | 0.206 |
| SNP_A-8422201 | 7 | 729070    | rs4724821  | HEATR2  | p22.3 | 0.358 | 0.761 |
| SNP_A-8516729 | 7 | 44259047  | rs10232351 | CAMK2B  | p13   | 0.408 | 0.621 |
| SNP_A-8416282 | 7 | 44277470  | rs10230538 | CAMK2B  | p13   | 0.277 | 0.468 |
| SNP_A-8368253 | 7 | 44286123  | rs12702075 | CAMK2B  | p13   | 0.403 | 0.315 |
| SNP_A-8326209 | 7 | 44286959  | rs4724298  | CAMK2B  | p13   | 0.183 | 0.627 |
| SNP_A-8470754 | 7 | 44296414  | rs10281178 | CAMK2B  | p13   | 0.431 | 0.076 |
| SNP_A-1913700 | 7 | 44300378  | rs3934888  | CAMK2B  | p13   | 0.434 | 0.150 |
| SNP_A-8490314 | 7 | 44301680  | rs12216637 | CAMK2B  | p13   | 0.114 | 0.682 |
| SNP_A-1813392 | 7 | 44321565  | rs4294091  | CAMK2B  | p13   | 0.481 | 0.274 |
| SNP_A-8669774 | 7 | 106474152 | rs997381   | PRKAR2B | q22.3 | 0.450 | 0.281 |
| SNP_A-8708698 | 7 | 106481048 | rs758943   | PRKAR2B | q22.3 | 0.331 | 0.218 |
| SNP_A-8613466 | 7 | 106481602 | rs2237650  | PRKAR2B | q22.3 | 0.452 | 0.819 |
| SNP_A-2169470 | 7 | 106506649 | rs17340577 | PRKAR2B | q22.3 | 0.089 | 0.157 |
| SNP_A-4266530 | 7 | 106507403 | rs2251838  | PRKAR2B | q22.3 | 0.355 | 0.883 |
| SNP_A-2178086 | 7 | 106508168 | rs12154324 | PRKAR2B | q22.3 | 0.095 | 0.231 |
| SNP_A-4216573 | 7 | 106517269 | rs7786692  | PRKAR2B | q22.3 | 0.096 | 0.219 |
| SNP_A-4219957 | 7 | 106517447 | rs17153823 | PRKAR2B | q22.3 | 0.095 | 0.097 |
| SNP_A-8669775 | 7 | 106529284 | rs3735613  | PRKAR2B | q22.3 | 0.496 | 0.746 |
| SNP_A-8331260 | 7 | 106549015 | rs10281856 | PRKAR2B | q22.3 | 0.399 | 0.351 |
| SNP_A-2075026 | 7 | 106550083 | rs10272371 | PRKAR2B | q22.3 | 0.096 | 0.208 |
| SNP_A-2278737 | 7 | 106550454 | rs13224682 | PRKAR2B | q22.3 | 0.074 | 0.329 |
| SNP_A-2137099 | 7 | 106550514 | rs17425839 | PRKAR2B | q22.3 | 0.093 | 0.111 |
| SNP_A-1990831 | 7 | 106555592 | rs9656135  | PRKAR2B | q22.3 | 0.072 | 0.185 |
| SNP_A-8569085 | 7 | 106563803 | rs7809330  | PRKAR2B | q22.3 | 0.495 | 0.714 |
| SNP_A-1802978 | 7 | 106564439 | rs6960708  | PRKAR2B | q22.3 | 0.099 | 0.173 |
| SNP_A-8417247 | 7 | 106567620 | rs3801968  | PRKAR2B | q22.3 | 0.426 | 0.315 |
| SNP_A-8595189 | 7 | 106569919 | rs3752645  | PRKAR2B | q22.3 | 0.095 | 0.097 |
| SNP_A-2138633 | 7 | 106575857 | rs6946931  | PRKAR2B | q22.3 | 0.187 | 0.347 |
| SNP_A-1990832 | 7 | 106581336 | rs1981696  | PRKAR2B | q22.3 | 0.188 | 0.466 |
| SNP_A-8347862 | 7 | 106586279 | rs257375   | PRKAR2B | q22.3 | 0.189 | 0.409 |
| SNP_A-8635523 | 7 | 150886109 | rs5017428  | PRKAG2  | q36.1 | 0.371 | 0.804 |
| SNP_A-2228406 | 7 | 150892423 | rs2302533  | PRKAG2  | q36.1 | 0.131 | 0.355 |
| SNP_A-8284975 | 7 | 150893238 | rs2302532  | PRKAG2  | q36.1 | 0.275 | 0.172 |

|               |   |           |            |        |       |       |       |
|---------------|---|-----------|------------|--------|-------|-------|-------|
| SNP_A-8509984 | 7 | 150903423 | rs17715595 | PRKAG2 | q36.1 | 0.145 | 0.731 |
| SNP_A-1991757 | 7 | 150906739 | rs1029946  | PRKAG2 | q36.1 | 0.150 | 0.209 |
| SNP_A-8284976 | 7 | 150906805 | rs1029945  | PRKAG2 | q36.1 | 0.295 | 0.484 |
| SNP_A-8709655 | 7 | 150910802 | rs17173199 | PRKAG2 | q36.1 | 0.143 | 0.231 |
| SNP_A-2138366 | 7 | 150916094 | rs17173202 | PRKAG2 | q36.1 | 0.141 | 0.459 |
| SNP_A-2229375 | 7 | 150916125 | rs6464148  | PRKAG2 | q36.1 | 0.142 | 0.408 |
| SNP_A-8301438 | 7 | 150918894 | rs4725411  | PRKAG2 | q36.1 | 0.141 | 0.459 |
| SNP_A-1784479 | 7 | 150919943 | rs3789813  | PRKAG2 | q36.1 | 0.141 | 0.433 |
| SNP_A-8398409 | 7 | 150920999 | rs2538036  | PRKAG2 | q36.1 | 0.463 | 0.382 |
| SNP_A-8348140 | 7 | 150922510 | rs4725413  | PRKAG2 | q36.1 | 0.141 | 0.451 |
| SNP_A-8672858 | 7 | 150939500 | rs4726060  | PRKAG2 | q36.1 | 0.256 | 0.449 |
| SNP_A-8581772 | 7 | 150945458 | rs2538045  | PRKAG2 | q36.1 | 0.384 | 0.718 |
| SNP_A-2073394 | 7 | 150945706 | rs2538042  | PRKAG2 | q36.1 | 0.391 | 0.673 |
| SNP_A-4280215 | 7 | 150949911 | rs4725415  | PRKAG2 | q36.1 | 0.469 | 0.914 |
| SNP_A-1901852 | 7 | 150950488 | rs6464156  | PRKAG2 | q36.1 | 0.468 | 0.983 |
| SNP_A-8711360 | 7 | 150952094 | rs2727565  | PRKAG2 | q36.1 | 0.255 | 0.193 |
| SNP_A-8650995 | 7 | 150952256 | rs9801653  | PRKAG2 | q36.1 | 0.118 | 0.806 |
| SNP_A-4222472 | 7 | 150956126 | rs1860736  | PRKAG2 | q36.1 | 0.105 | 0.941 |
| SNP_A-1788050 | 7 | 150956192 | rs12535806 | PRKAG2 | q36.1 | 0.120 | 0.731 |
| SNP_A-1834698 | 7 | 150974571 | rs1345278  | PRKAG2 | q36.1 | 0.450 | 0.624 |
| SNP_A-2042599 | 7 | 150977323 | rs10952315 | PRKAG2 | q36.1 | 0.367 | 0.896 |
| SNP_A-1812832 | 7 | 150978395 | rs2727527  | PRKAG2 | q36.1 | 0.319 | 0.739 |
| SNP_A-2082185 | 7 | 150982545 | rs954228   | PRKAG2 | q36.1 | 0.289 | 0.352 |
| SNP_A-8551175 | 7 | 150983018 | rs2017491  | PRKAG2 | q36.1 | 0.329 | 0.051 |
| SNP_A-8448827 | 7 | 150985333 | rs1860735  | PRKAG2 | q36.1 | 0.103 | 0.125 |
| SNP_A-2309081 | 7 | 150987207 | rs2727529  | PRKAG2 | q36.1 | 0.392 | 0.483 |
| SNP_A-1893701 | 7 | 150995197 | rs1105842  | PRKAG2 | q36.1 | 0.157 | 0.822 |
| SNP_A-1893539 | 7 | 150995290 | rs1105843  | PRKAG2 | q36.1 | 0.314 | 0.297 |
| SNP_A-1939231 | 7 | 150996578 | rs954482   | PRKAG2 | q36.1 | 0.313 | 0.204 |
| SNP_A-8501280 | 7 | 151005762 | rs2727539  | PRKAG2 | q36.1 | 0.142 | 0.145 |
| SNP_A-8647778 | 7 | 151013382 | rs2727554  | PRKAG2 | q36.1 | 0.487 | 0.206 |
| SNP_A-8697744 | 7 | 151013395 | rs2727553  | PRKAG2 | q36.1 | 0.481 | 0.160 |
| SNP_A-4290395 | 7 | 151015436 | rs4726084  | PRKAG2 | q36.1 | 0.195 | 0.548 |
| SNP_A-4247729 | 7 | 151018130 | rs10277859 | PRKAG2 | q36.1 | 0.193 | 0.801 |
| SNP_A-2085058 | 7 | 151018897 | rs2024266  | PRKAG2 | q36.1 | 0.482 | 0.246 |
| SNP_A-8537816 | 7 | 151019183 | rs7797944  | PRKAG2 | q36.1 | 0.180 | 0.406 |
| SNP_A-8324197 | 7 | 151019663 | rs2727550  | PRKAG2 | q36.1 | 0.328 | 0.790 |
| SNP_A-2231445 | 7 | 151020254 | rs6970728  | PRKAG2 | q36.1 | 0.193 | 0.786 |
| SNP_A-2036134 | 7 | 151020434 | rs6970666  | PRKAG2 | q36.1 | 0.190 | 0.871 |
| SNP_A-4245070 | 7 | 151022586 | rs2727551  | PRKAG2 | q36.1 | 0.076 | 0.369 |
| SNP_A-8477909 | 7 | 151026570 | rs9648723  | PRKAG2 | q36.1 | 0.194 | 0.298 |
| SNP_A-8304100 | 7 | 151033433 | rs2727564  | PRKAG2 | q36.1 | 0.455 | 0.074 |
| SNP_A-8651315 | 7 | 151033723 | rs2374270  | PRKAG2 | q36.1 | 0.368 | 0.487 |
| SNP_A-4284763 | 7 | 151034022 | rs4725423  | PRKAG2 | q36.1 | 0.085 | 0.187 |
| SNP_A-2187073 | 7 | 151034062 | rs2727563  | PRKAG2 | q36.1 | 0.409 | 0.598 |
| SNP_A-1887074 | 7 | 151036751 | rs10480299 | PRKAG2 | q36.1 | 0.280 | 0.128 |
| SNP_A-2111566 | 7 | 151045974 | rs10224002 | PRKAG2 | q36.1 | 0.288 | 0.108 |
| SNP_A-8404196 | 7 | 151053880 | rs2536069  | PRKAG2 | q36.1 | 0.221 | 0.252 |
| SNP_A-2202651 | 7 | 151054129 | rs13239239 | PRKAG2 | q36.1 | 0.323 | 0.844 |
| SNP_A-8304176 | 7 | 151061642 | rs4726088  | PRKAG2 | q36.1 | 0.403 | 0.194 |
| SNP_A-4281374 | 7 | 151062399 | rs1108722  | PRKAG2 | q36.1 | 0.397 | 0.930 |
| SNP_A-8418793 | 7 | 151067285 | rs885273   | PRKAG2 | q36.1 | 0.392 | 0.292 |
| SNP_A-8518567 | 7 | 151070761 | rs11768438 | PRKAG2 | q36.1 | 0.307 | 0.803 |
| SNP_A-8656895 | 7 | 151072903 | rs1001117  | PRKAG2 | q36.1 | 0.325 | 0.393 |
| SNP_A-8643885 | 7 | 151073677 | rs11771330 | PRKAG2 | q36.1 | 0.453 | 0.639 |
| SNP_A-1883435 | 7 | 151083561 | rs7801616  | PRKAG2 | q36.1 | 0.455 | 0.370 |
| SNP_A-8616844 | 7 | 151087015 | rs6965771  | PRKAG2 | q36.1 | 0.252 | 0.480 |
| SNP_A-2253591 | 7 | 151093470 | rs7780008  | PRKAG2 | q36.1 | 0.365 | 0.259 |
| SNP_A-2291492 | 7 | 151094097 | rs7800069  | PRKAG2 | q36.1 | 0.465 | 0.776 |
| SNP_A-2107674 | 7 | 151094445 | rs7784818  | PRKAG2 | q36.1 | 0.486 | 0.985 |
| SNP_A-8298079 | 7 | 151106857 | rs9632641  | PRKAG2 | q36.1 | 0.207 | 0.109 |
| SNP_A-8691676 | 7 | 151114829 | rs11763144 | PRKAG2 | q36.1 | 0.150 | 0.993 |
| SNP_A-8714213 | 7 | 151128901 | rs4726097  | PRKAG2 | q36.1 | 0.211 | 0.223 |
| SNP_A-8416447 | 7 | 151133235 | rs9648724  | PRKAG2 | q36.1 | 0.227 | 0.948 |
| SNP_A-8699658 | 7 | 151134234 | rs4442045  | PRKAG2 | q36.1 | 0.194 | 0.768 |
| SNP_A-8712371 | 7 | 151134743 | rs4726100  | PRKAG2 | q36.1 | 0.162 | 0.896 |
| SNP_A-8304248 | 7 | 151137088 | rs6464173  | PRKAG2 | q36.1 | 0.468 | 0.673 |
| SNP_A-8400235 | 7 | 151139190 | rs12539356 | PRKAG2 | q36.1 | 0.270 | 0.767 |
| SNP_A-8479991 | 7 | 151139777 | rs1881638  | PRKAG2 | q36.1 | 0.271 | 0.733 |
| SNP_A-1787510 | 7 | 151141292 | rs4631369  | PRKAG2 | q36.1 | 0.377 | 0.722 |
| SNP_A-8470174 | 7 | 151141463 | rs12540943 | PRKAG2 | q36.1 | 0.159 | 0.170 |
| SNP_A-1961623 | 7 | 151141504 | rs1881634  | PRKAG2 | q36.1 | 0.153 | 0.113 |
| SNP_A-8637726 | 7 | 151147753 | rs1881629  | PRKAG2 | q36.1 | 0.450 | 0.446 |
| SNP_A-8368707 | 7 | 151149683 | rs11769593 | PRKAG2 | q36.1 | 0.252 | 0.400 |

|               |    |           |            |         |        |       |       |
|---------------|----|-----------|------------|---------|--------|-------|-------|
| SNP_A-4242522 | 7  | 151150061 | rs11770376 | PRKAG2  | q36.1  | 0.360 | 0.953 |
| SNP_A-2013017 | 7  | 151152511 | rs6978617  | PRKAG2  | q36.1  | 0.097 | 0.933 |
| SNP_A-4266687 | 7  | 151153648 | rs1108845  | PRKAG2  | q36.1  | 0.082 | 0.122 |
| SNP_A-8426165 | 7  | 151156399 | rs11773373 | PRKAG2  | q36.1  | 0.251 | 0.400 |
| SNP_A-8434452 | 7  | 151171892 | rs1109277  | PRKAG2  | q36.1  | 0.456 | 0.525 |
| SNP_A-8675572 | 7  | 151175924 | rs11772236 | PRKAG2  | q36.1  | 0.351 | 0.257 |
| SNP_A-8490884 | 7  | 151177522 | rs7795096  | PRKAG2  | q36.1  | 0.500 | 0.419 |
| SNP_A-8586815 | 7  | 151178940 | rs10952322 | PRKAG2  | q36.1  | 0.141 | 0.148 |
| SNP_A-8550960 | 7  | 151186459 | rs6961830  | PRKAG2  | q36.1  | 0.174 | 0.117 |
| SNP_A-8470212 | 7  | 151188347 | rs6955784  | PRKAG2  | q36.1  | 0.316 | 0.610 |
| SNP_A-8434380 | 7  | 151190466 | rs12703164 | PRKAG2  | q36.1  | 0.326 | 0.052 |
| SNP_A-8569100 | 8  | 79595987  | rs13275966 | PKIA    | q21.12 | 0.105 | 0.944 |
| SNP_A-4213048 | 8  | 79613925  | rs10504676 | PKIA    | q21.12 | 0.108 | 0.470 |
| SNP_A-2161348 | 8  | 79663796  | rs16905824 | PKIA    | q21.12 | 0.112 | 0.775 |
| SNP_A-1956412 | 9  | 127239694 | rs1129     | MAPKAP1 | q33.3  | 0.365 | 0.793 |
| SNP_A-4282148 | 9  | 127244580 | rs7023669  | MAPKAP1 | q33.3  | 0.247 | 0.329 |
| SNP_A-8599260 | 9  | 127248748 | rs10760398 | MAPKAP1 | q33.3  | 0.322 | 0.554 |
| SNP_A-4282551 | 9  | 127262845 | rs7853181  | MAPKAP1 | q33.3  | 0.447 | 0.743 |
| SNP_A-2072855 | 9  | 127272220 | rs1891034  | MAPKAP1 | q33.3  | 0.295 | 0.831 |
| SNP_A-4202742 | 9  | 127290230 | rs7046471  | MAPKAP1 | q33.3  | 0.314 | 0.837 |
| SNP_A-2252873 | 9  | 127300783 | rs7022356  | MAPKAP1 | q33.3  | 0.256 | 0.902 |
| SNP_A-8519067 | 9  | 127303238 | rs10986778 | MAPKAP1 | q33.3  | 0.252 | 0.779 |
| SNP_A-2026967 | 9  | 127315812 | rs4837018  | MAPKAP1 | q33.3  | 0.464 | 0.460 |
| SNP_A-8595602 | 9  | 127315902 | rs4837019  | MAPKAP1 | q33.3  | 0.417 | 0.403 |
| SNP_A-8590962 | 9  | 127321243 | rs12555339 | MAPKAP1 | q33.3  | 0.157 | 0.800 |
| SNP_A-8589561 | 9  | 127328249 | rs10120000 | MAPKAP1 | q33.3  | 0.361 | 0.958 |
| SNP_A-2215776 | 9  | 127339426 | rs522894   | MAPKAP1 | q33.3  | 0.170 | 0.996 |
| SNP_A-2171695 | 9  | 127356466 | rs829179   | MAPKAP1 | q33.3  | 0.084 | 0.148 |
| SNP_A-2199117 | 9  | 127365755 | rs530628   | MAPKAP1 | q33.3  | 0.471 | 0.971 |
| SNP_A-1848511 | 9  | 127365776 | rs494760   | MAPKAP1 | q33.3  | 0.057 | 0.474 |
| SNP_A-8644670 | 9  | 127380762 | rs12341245 | MAPKAP1 | q33.3  | 0.389 | 0.510 |
| SNP_A-8521766 | 9  | 127380844 | rs577026   | MAPKAP1 | q33.3  | 0.433 | 0.875 |
| SNP_A-4299286 | 9  | 127402558 | rs476819   | MAPKAP1 | q33.3  | 0.440 | 0.959 |
| SNP_A-8480814 | 9  | 127404722 | rs4838276  | MAPKAP1 | q33.3  | 0.358 | 0.603 |
| SNP_A-2061428 | 9  | 127409045 | rs534214   | MAPKAP1 | q33.3  | 0.468 | 0.822 |
| SNP_A-4241559 | 9  | 127417694 | rs829312   | MAPKAP1 | q33.3  | 0.462 | 0.553 |
| SNP_A-2152300 | 9  | 127434444 | rs829311   | MAPKAP1 | q33.3  | 0.447 | 0.771 |
| SNP_A-1811907 | 9  | 127447119 | rs13300639 | MAPKAP1 | q33.3  | 0.385 | 0.571 |
| SNP_A-2221033 | 9  | 127449549 | rs13292924 | MAPKAP1 | q33.3  | 0.389 | 0.485 |
| SNP_A-1927284 | 9  | 127462849 | rs551938   | MAPKAP1 | q33.3  | 0.276 | 0.579 |
| SNP_A-4217995 | 9  | 127468088 | rs626208   | MAPKAP1 | q33.3  | 0.426 | 0.817 |
| SNP_A-2031839 | 9  | 127476230 | rs17350527 | MAPKAP1 | q33.3  | 0.079 | 0.920 |
| SNP_A-8390436 | 9  | 127477826 | rs1250736  | MAPKAP1 | q33.3  | 0.438 | 0.954 |
| SNP_A-4258438 | 9  | 127486186 | rs4838284  | MAPKAP1 | q33.3  | 0.382 | 0.739 |
| SNP_A-4267739 | 9  | 127486709 | rs4838285  | MAPKAP1 | q33.3  | 0.408 | 0.709 |
| SNP_A-8559768 | 9  | 127488612 | rs7862834  | MAPKAP1 | q33.3  | 0.135 | 0.201 |
| SNP_A-8354506 | 9  | 127488906 | rs7863341  | MAPKAP1 | q33.3  | 0.430 | 1.000 |
| SNP_A-1919232 | 9  | 127496460 | rs17259739 | MAPKAP1 | q33.3  | 0.386 | 0.528 |
| SNP_A-1864261 | 10 | 6509161   | rs582052   | PRKCQ   | p15.1  | 0.480 | 0.936 |
| SNP_A-2136491 | 10 | 6509330   | rs4750439  | PRKCQ   | p15.1  | 0.248 | 0.850 |
| SNP_A-2298977 | 10 | 6509679   | rs2453     | PRKCQ   | p15.1  | 0.240 | 0.729 |
| SNP_A-2296825 | 10 | 6509823   | rs2236380  | PRKCQ   | p15.1  | 0.279 | 0.541 |
| SNP_A-8400784 | 10 | 6511000   | rs17299670 | PRKCQ   | p15.1  | 0.095 | 0.861 |
| SNP_A-1913515 | 10 | 6511349   | rs681071   | PRKCQ   | p15.1  | 0.074 | 0.839 |
| SNP_A-1869427 | 10 | 6511822   | rs11596750 | PRKCQ   | p15.1  | 0.273 | 0.444 |
| SNP_A-1867637 | 10 | 6512253   | rs1889001  | PRKCQ   | p15.1  | 0.481 | 0.681 |
| SNP_A-2239045 | 10 | 6512897   | rs11258747 | PRKCQ   | p15.1  | 0.193 | 0.075 |
| SNP_A-2241917 | 10 | 6514033   | rs10796145 | PRKCQ   | p15.1  | 0.276 | 0.704 |
| SNP_A-1847461 | 10 | 6517273   | rs677986   | PRKCQ   | p15.1  | 0.253 | 0.904 |
| SNP_A-8635664 | 10 | 6521233   | rs12358161 | PRKCQ   | p15.1  | 0.141 | 0.212 |
| SNP_A-1906357 | 10 | 6521410   | rs961203   | PRKCQ   | p15.1  | 0.058 | 0.945 |
| SNP_A-8550681 | 10 | 6525728   | rs7918373  | PRKCQ   | p15.1  | 0.107 | 0.369 |
| SNP_A-8457248 | 10 | 6526588   | rs17372283 | PRKCQ   | p15.1  | 0.196 | 0.117 |
| SNP_A-8386893 | 10 | 6526617   | rs624016   | PRKCQ   | p15.1  | 0.355 | 0.838 |
| SNP_A-8488485 | 10 | 6527780   | rs12573280 | PRKCQ   | p15.1  | 0.342 | 0.851 |
| SNP_A-1993466 | 10 | 6537313   | rs10508307 | PRKCQ   | p15.1  | 0.167 | 0.214 |
| SNP_A-1993467 | 10 | 6537428   | rs586457   | PRKCQ   | p15.1  | 0.294 | 0.363 |
| SNP_A-8453799 | 10 | 6538729   | rs11258943 | PRKCQ   | p15.1  | 0.195 | 0.105 |
| SNP_A-8541749 | 10 | 6538805   | rs2296123  | PRKCQ   | p15.1  | 0.373 | 0.620 |
| SNP_A-4292124 | 10 | 6539234   | rs4750491  | PRKCQ   | p15.1  | 0.348 | 0.064 |
| SNP_A-1993470 | 10 | 6540724   | rs7918923  | PRKCQ   | p15.1  | 0.067 | 0.889 |
| SNP_A-4266973 | 10 | 6541194   | rs7099451  | PRKCQ   | p15.1  | 0.280 | 0.176 |
| SNP_A-2039362 | 10 | 6541451   | rs4750495  | PRKCQ   | p15.1  | 0.279 | 0.332 |
| SNP_A-4266974 | 10 | 6542103   | rs10508308 | PRKCQ   | p15.1  | 0.054 | 0.273 |

|               |    |          |            |        |       |       |       |
|---------------|----|----------|------------|--------|-------|-------|-------|
| SNP_A-8291581 | 10 | 6543456  | rs618020   | PRKCQ  | p15.1 | 0.104 | 0.299 |
| SNP_A-1832746 | 10 | 6543737  | rs4364968  | PRKCQ  | p15.1 | 0.374 | 0.817 |
| SNP_A-1993472 | 10 | 6543900  | rs12146312 | PRKCQ  | p15.1 | 0.271 | 0.625 |
| SNP_A-8285432 | 10 | 6545937  | rs3793726  | PRKCQ  | p15.1 | 0.065 | 0.782 |
| SNP_A-8656095 | 10 | 6550540  | rs7895774  | PRKCQ  | p15.1 | 0.295 | 0.241 |
| SNP_A-2155816 | 10 | 6551392  | rs591441   | PRKCQ  | p15.1 | 0.201 | 0.787 |
| SNP_A-4266976 | 10 | 6560590  | rs7083579  | PRKCQ  | p15.1 | 0.183 | 0.866 |
| SNP_A-2259259 | 10 | 6561540  | rs11259097 | PRKCQ  | p15.1 | 0.153 | 0.267 |
| SNP_A-1865803 | 10 | 6562704  | rs3793730  | PRKCQ  | p15.1 | 0.120 | 0.478 |
| SNP_A-8529759 | 10 | 6562914  | rs494800   | PRKCQ  | p15.1 | 0.179 | 0.096 |
| SNP_A-1944680 | 10 | 6565959  | rs688879   | PRKCQ  | p15.1 | 0.400 | 0.850 |
| SNP_A-1917353 | 10 | 6566503  | rs501878   | PRKCQ  | p15.1 | 0.399 | 0.747 |
| SNP_A-8348401 | 10 | 6567149  | rs2236379  | PRKCQ  | p15.1 | 0.270 | 0.847 |
| SNP_A-1825925 | 10 | 6567350  | rs661891   | PRKCQ  | p15.1 | 0.475 | 0.703 |
| SNP_A-2294075 | 10 | 6572010  | rs41367851 | PRKCQ  | p15.1 | 0.063 | 0.094 |
| SNP_A-8472588 | 10 | 6573883  | rs3815975  | PRKCQ  | p15.1 | 0.410 | 0.157 |
| SNP_A-8510994 | 10 | 6573906  | rs3815974  | PRKCQ  | p15.1 | 0.410 | 0.230 |
| SNP_A-8285440 | 10 | 6575438  | rs634492   | PRKCQ  | p15.1 | 0.358 | 0.407 |
| SNP_A-2087308 | 10 | 6576558  | rs6602745  | PRKCQ  | p15.1 | 0.103 | 0.833 |
| SNP_A-1863206 | 10 | 6577043  | rs11259211 | PRKCQ  | p15.1 | 0.109 | 0.567 |
| SNP_A-4220608 | 10 | 6580729  | rs650652   | PRKCQ  | p15.1 | 0.354 | 0.235 |
| SNP_A-4274400 | 10 | 6585110  | rs510745   | PRKCQ  | p15.1 | 0.102 | 0.287 |
| SNP_A-2300959 | 10 | 6586077  | rs11259272 | PRKCQ  | p15.1 | 0.473 | 0.170 |
| SNP_A-1855073 | 10 | 6590205  | rs596866   | PRKCQ  | p15.1 | 0.185 | 0.099 |
| SNP_A-8285454 | 10 | 6608207  | rs4750565  | PRKCQ  | p15.1 | 0.123 | 0.166 |
| SNP_A-1941092 | 10 | 6612231  | rs11259403 | PRKCQ  | p15.1 | 0.352 | 0.171 |
| SNP_A-2025910 | 10 | 6617372  | rs12249263 | PRKCQ  | p15.1 | 0.257 | 0.219 |
| SNP_A-2251216 | 10 | 6617679  | rs11259425 | PRKCQ  | p15.1 | 0.134 | 0.458 |
| SNP_A-1916412 | 10 | 6628023  | rs10752351 | PRKCQ  | p15.1 | 0.181 | 0.978 |
| SNP_A-2049930 | 10 | 6636248  | rs6602820  | PRKCQ  | p15.1 | 0.452 | 0.580 |
| SNP_A-1803276 | 10 | 6646292  | rs4748152  | PRKCQ  | p15.1 | 0.148 | 0.880 |
| SNP_A-8306656 | 10 | 6646441  | rs943450   | PRKCQ  | p15.1 | 0.184 | 0.248 |
| SNP_A-2122755 | 10 | 6648319  | rs7072496  | PRKCQ  | p15.1 | 0.186 | 0.334 |
| SNP_A-1890671 | 10 | 6648739  | rs1887327  | PRKCQ  | p15.1 | 0.187 | 0.239 |
| SNP_A-1938720 | 10 | 6651332  | rs10906888 | PRKCQ  | p15.1 | 0.369 | 0.938 |
| SNP_A-2087209 | 10 | 6654063  | rs2387585  | PRKCQ  | p15.1 | 0.400 | 0.872 |
| SNP_A-1993516 | 10 | 6656342  | rs4620621  | PRKCQ  | p15.1 | 0.420 | 0.716 |
| SNP_A-1993517 | 10 | 6656369  | rs4750638  | PRKCQ  | p15.1 | 0.407 | 0.791 |
| SNP_A-8627253 | 10 | 12433494 | rs3013016  | CAMK1D | p13   | 0.406 | 0.860 |
| SNP_A-8299216 | 10 | 12442400 | rs7909493  | CAMK1D | p13   | 0.108 | 0.599 |
| SNP_A-2248691 | 10 | 12443034 | rs17151584 | CAMK1D | p13   | 0.089 | 0.294 |
| SNP_A-2073411 | 10 | 12452249 | rs10906138 | CAMK1D | p13   | 0.243 | 0.571 |
| SNP_A-1803239 | 10 | 12455059 | rs41407149 | CAMK1D | p13   | 0.323 | 0.407 |
| SNP_A-2063826 | 10 | 12455154 | rs41325747 | CAMK1D | p13   | 0.319 | 0.354 |
| SNP_A-8565157 | 10 | 12458537 | rs2724778  | CAMK1D | p13   | 0.187 | 0.739 |
| SNP_A-1879053 | 10 | 12459481 | rs12261350 | CAMK1D | p13   | 0.436 | 0.570 |
| SNP_A-8599945 | 10 | 12479829 | rs2801490  | CAMK1D | p13   | 0.318 | 0.946 |
| SNP_A-4272702 | 10 | 12485545 | rs11257772 | CAMK1D | p13   | 0.098 | 0.342 |
| SNP_A-2084935 | 10 | 12486578 | rs1892302  | CAMK1D | p13   | 0.300 | 0.599 |
| SNP_A-2155105 | 10 | 12496489 | rs11257778 | CAMK1D | p13   | 0.185 | 0.424 |
| SNP_A-2298551 | 10 | 12498038 | rs2399860  | CAMK1D | p13   | 0.184 | 0.284 |
| SNP_A-1817793 | 10 | 12504311 | rs10795953 | CAMK1D | p13   | 0.377 | 0.933 |
| SNP_A-1896138 | 10 | 12504501 | rs17136824 | CAMK1D | p13   | 0.194 | 0.113 |
| SNP_A-8471273 | 10 | 12504979 | rs17136827 | CAMK1D | p13   | 0.196 | 0.081 |
| SNP_A-8394021 | 10 | 12505710 | rs11257786 | CAMK1D | p13   | 0.183 | 0.364 |
| SNP_A-8532351 | 10 | 12507234 | rs11592149 | CAMK1D | p13   | 0.237 | 0.293 |
| SNP_A-2048907 | 10 | 12508143 | rs1111056  | CAMK1D | p13   | 0.437 | 0.978 |
| SNP_A-2163480 | 10 | 12518482 | rs11595633 | CAMK1D | p13   | 0.180 | 0.403 |
| SNP_A-1995546 | 10 | 12519661 | rs2399858  | CAMK1D | p13   | 0.185 | 0.199 |
| SNP_A-2053069 | 10 | 12520245 | rs2768364  | CAMK1D | p13   | 0.184 | 0.167 |
| SNP_A-1920224 | 10 | 12520639 | rs2801493  | CAMK1D | p13   | 0.184 | 0.181 |
| SNP_A-8707317 | 10 | 12524562 | rs10906150 | CAMK1D | p13   | 0.203 | 0.906 |
| SNP_A-1840396 | 10 | 12527915 | rs6602587  | CAMK1D | p13   | 0.358 | 0.648 |
| SNP_A-8349665 | 10 | 12528002 | rs6602588  | CAMK1D | p13   | 0.361 | 0.776 |
| SNP_A-1950697 | 10 | 12530792 | rs2768451  | CAMK1D | p13   | 0.066 | 0.264 |
| SNP_A-2150521 | 10 | 12530824 | rs12763487 | CAMK1D | p13   | 0.220 | 0.363 |
| SNP_A-2303102 | 10 | 12531335 | rs11596121 | CAMK1D | p13   | 0.068 | 0.931 |
| SNP_A-1915883 | 10 | 12531353 | rs4750216  | CAMK1D | p13   | 0.152 | 0.714 |
| SNP_A-2134299 | 10 | 12533654 | rs17569335 | CAMK1D | p13   | 0.295 | 0.255 |
| SNP_A-1792760 | 10 | 12535542 | rs11257802 | CAMK1D | p13   | 0.279 | 0.070 |
| SNP_A-1995553 | 10 | 12537753 | rs1108131  | CAMK1D | p13   | 0.279 | 0.023 |
| SNP_A-4267311 | 10 | 12537776 | rs2768367  | CAMK1D | p13   | 0.128 | 0.065 |
| SNP_A-8280366 | 10 | 12539866 | rs2399849  | CAMK1D | p13   | 0.183 | 0.523 |
| SNP_A-8475107 | 10 | 12540181 | rs2815613  | CAMK1D | p13   | 0.283 | 0.925 |

|               |    |          |            |        |     |       |       |
|---------------|----|----------|------------|--------|-----|-------|-------|
| SNP_A-8456854 | 10 | 12544075 | rs11257807 | CAMK1D | p13 | 0.167 | 0.437 |
| SNP_A-8280372 | 10 | 12551914 | rs7893997  | CAMK1D | p13 | 0.379 | 0.754 |
| SNP_A-8280791 | 10 | 12551939 | rs7894008  | CAMK1D | p13 | 0.377 | 0.598 |
| SNP_A-2234918 | 10 | 12555829 | rs1543595  | CAMK1D | p13 | 0.228 | 0.359 |
| SNP_A-8286979 | 10 | 12557897 | rs4620627  | CAMK1D | p13 | 0.169 | 0.697 |
| SNP_A-4254260 | 10 | 12559076 | rs12251472 | CAMK1D | p13 | 0.184 | 0.651 |
| SNP_A-2183730 | 10 | 12559946 | rs12780204 | CAMK1D | p13 | 0.192 | 0.498 |
| SNP_A-2201946 | 10 | 12560669 | rs12784955 | CAMK1D | p13 | 0.191 | 0.662 |
| SNP_A-8643472 | 10 | 12560721 | rs12762343 | CAMK1D | p13 | 0.186 | 0.524 |
| SNP_A-2055669 | 10 | 12563135 | rs2768428  | CAMK1D | p13 | 0.238 | 0.283 |
| SNP_A-8652259 | 10 | 12571280 | rs11257827 | CAMK1D | p13 | 0.299 | 0.835 |
| SNP_A-8452614 | 10 | 12571625 | rs10906157 | CAMK1D | p13 | 0.219 | 0.722 |
| SNP_A-8609212 | 10 | 12573294 | rs1998966  | CAMK1D | p13 | 0.255 | 0.438 |
| SNP_A-8346299 | 10 | 12573760 | rs2768432  | CAMK1D | p13 | 0.399 | 0.577 |
| SNP_A-8633091 | 10 | 12574304 | rs10906158 | CAMK1D | p13 | 0.221 | 0.154 |
| SNP_A-1925003 | 10 | 12575062 | rs2768438  | CAMK1D | p13 | 0.319 | 0.697 |
| SNP_A-2312137 | 10 | 12575154 | rs2768439  | CAMK1D | p13 | 0.318 | 0.640 |
| SNP_A-2203283 | 10 | 12575203 | rs2768440  | CAMK1D | p13 | 0.319 | 0.713 |
| SNP_A-8478972 | 10 | 12577095 | rs12248414 | CAMK1D | p13 | 0.223 | 0.210 |
| SNP_A-8543459 | 10 | 12577433 | rs17151786 | CAMK1D | p13 | 0.222 | 0.197 |
| SNP_A-8393572 | 10 | 12578296 | rs2399846  | CAMK1D | p13 | 0.457 | 0.584 |
| SNP_A-2099501 | 10 | 12578497 | rs7078980  | CAMK1D | p13 | 0.217 | 0.331 |
| SNP_A-2300843 | 10 | 12581678 | rs7081851  | CAMK1D | p13 | 0.463 | 0.365 |
| SNP_A-2145383 | 10 | 12584244 | rs1108959  | CAMK1D | p13 | 0.281 | 0.563 |
| SNP_A-8602335 | 10 | 12584858 | rs11257835 | CAMK1D | p13 | 0.056 | 0.143 |
| SNP_A-1944328 | 10 | 12590976 | rs11257841 | CAMK1D | p13 | 0.477 | 0.163 |
| SNP_A-2032149 | 10 | 12593004 | rs7911448  | CAMK1D | p13 | 0.216 | 0.637 |
| SNP_A-2166021 | 10 | 12594197 | rs2815652  | CAMK1D | p13 | 0.454 | 0.171 |
| SNP_A-2244113 | 10 | 12594304 | rs41336744 | CAMK1D | p13 | 0.249 | 0.142 |
| SNP_A-8326627 | 10 | 12610518 | rs12356332 | CAMK1D | p13 | 0.189 | 0.770 |
| SNP_A-8395656 | 10 | 12612041 | rs2815644  | CAMK1D | p13 | 0.376 | 0.647 |
| SNP_A-2045707 | 10 | 12613112 | rs2768463  | CAMK1D | p13 | 0.344 | 0.084 |
| SNP_A-8685188 | 10 | 12616011 | rs2815641  | CAMK1D | p13 | 0.349 | 0.912 |
| SNP_A-1878776 | 10 | 12617799 | rs10458820 | CAMK1D | p13 | 0.282 | 0.732 |
| SNP_A-1811664 | 10 | 12617996 | rs6602593  | CAMK1D | p13 | 0.410 | 0.181 |
| SNP_A-2313545 | 10 | 12619465 | rs10458822 | CAMK1D | p13 | 0.272 | 0.402 |
| SNP_A-8581130 | 10 | 12620670 | rs11257872 | CAMK1D | p13 | 0.259 | 0.260 |
| SNP_A-8607420 | 10 | 12622695 | rs7910874  | CAMK1D | p13 | 0.134 | 0.494 |
| SNP_A-8534321 | 10 | 12622719 | rs11257877 | CAMK1D | p13 | 0.260 | 0.272 |
| SNP_A-8367068 | 10 | 12622790 | rs2815638  | CAMK1D | p13 | 0.399 | 0.423 |
| SNP_A-8605157 | 10 | 12623259 | rs1126368  | CAMK1D | p13 | 0.107 | 0.036 |
| SNP_A-8628383 | 10 | 12623318 | rs2492953  | CAMK1D | p13 | 0.095 | 0.110 |
| SNP_A-2073968 | 10 | 12624519 | rs2815637  | CAMK1D | p13 | 0.353 | 0.496 |
| SNP_A-2182648 | 10 | 12626943 | rs17493316 | CAMK1D | p13 | 0.315 | 0.790 |
| SNP_A-1874751 | 10 | 12629156 | rs7078960  | CAMK1D | p13 | 0.335 | 0.715 |
| SNP_A-8356130 | 10 | 12631718 | rs7897059  | CAMK1D | p13 | 0.410 | 0.707 |
| SNP_A-8633232 | 10 | 12634527 | rs2815630  | CAMK1D | p13 | 0.156 | 0.352 |
| SNP_A-8604749 | 10 | 12637439 | rs2815628  | CAMK1D | p13 | 0.309 | 0.023 |
| SNP_A-8452776 | 10 | 12637464 | rs10906166 | CAMK1D | p13 | 0.372 | 0.449 |
| SNP_A-8520982 | 10 | 12637496 | rs2815627  | CAMK1D | p13 | 0.308 | 0.017 |
| SNP_A-2000970 | 10 | 12639700 | rs2815624  | CAMK1D | p13 | 0.121 | 0.698 |
| SNP_A-4268196 | 10 | 12640070 | rs2815623  | CAMK1D | p13 | 0.059 | 0.543 |
| SNP_A-2046458 | 10 | 12640674 | rs2768348  | CAMK1D | p13 | 0.310 | 0.035 |
| SNP_A-4255641 | 10 | 12641445 | rs2648708  | CAMK1D | p13 | 0.117 | 0.848 |
| SNP_A-1874304 | 10 | 12641479 | rs12773063 | CAMK1D | p13 | 0.426 | 0.045 |
| SNP_A-8657116 | 10 | 12641510 | rs11257888 | CAMK1D | p13 | 0.427 | 0.039 |
| SNP_A-4223263 | 10 | 12643507 | rs12764138 | CAMK1D | p13 | 0.425 | 0.109 |
| SNP_A-4302372 | 10 | 12644337 | rs2815617  | CAMK1D | p13 | 0.310 | 0.047 |
| SNP_A-1809832 | 10 | 12644480 | rs2768352  | CAMK1D | p13 | 0.271 | 0.051 |
| SNP_A-2181106 | 10 | 12646058 | rs11257892 | CAMK1D | p13 | 0.061 | 0.607 |
| SNP_A-2312652 | 10 | 12646287 | rs7896236  | CAMK1D | p13 | 0.470 | 0.943 |
| SNP_A-8280824 | 10 | 12648682 | rs1409961  | CAMK1D | p13 | 0.466 | 0.811 |
| SNP_A-8367998 | 10 | 12652344 | rs12572894 | CAMK1D | p13 | 0.178 | 0.075 |
| SNP_A-8443225 | 10 | 12656239 | rs2815615  | CAMK1D | p13 | 0.396 | 0.021 |
| SNP_A-2100726 | 10 | 12668507 | rs4364954  | CAMK1D | p13 | 0.317 | 0.035 |
| SNP_A-8471113 | 10 | 12669374 | rs2895534  | CAMK1D | p13 | 0.194 | 0.548 |
| SNP_A-1949610 | 10 | 12672162 | rs2399880  | CAMK1D | p13 | 0.137 | 0.601 |
| SNP_A-2181586 | 10 | 12673372 | rs10732936 | CAMK1D | p13 | 0.321 | 0.027 |
| SNP_A-8332150 | 10 | 12678891 | rs10906180 | CAMK1D | p13 | 0.447 | 0.181 |
| SNP_A-2224069 | 10 | 12680803 | rs7911208  | CAMK1D | p13 | 0.270 | 0.302 |
| SNP_A-8621541 | 10 | 12681466 | rs10795966 | CAMK1D | p13 | 0.309 | 0.371 |
| SNP_A-8293473 | 10 | 12685143 | rs10906182 | CAMK1D | p13 | 0.082 | 0.967 |
| SNP_A-1933307 | 10 | 12685893 | rs11596728 | CAMK1D | p13 | 0.286 | 0.159 |
| SNP_A-2237869 | 10 | 12686538 | rs7906212  | CAMK1D | p13 | 0.083 | 0.087 |



|               |    |          |            |        |     |       |       |
|---------------|----|----------|------------|--------|-----|-------|-------|
| SNP_A-8491054 | 10 | 12686819 | rs17151970 | CAMK1D | p13 | 0.142 | 0.262 |
| SNP_A-1870292 | 10 | 12688155 | rs17151973 | CAMK1D | p13 | 0.262 | 0.366 |
| SNP_A-8377666 | 10 | 12690925 | rs12414714 | CAMK1D | p13 | 0.101 | 0.149 |
| SNP_A-2247873 | 10 | 12695806 | rs879753   | CAMK1D | p13 | 0.268 | 0.511 |
| SNP_A-4234545 | 10 | 12698876 | rs17152001 | CAMK1D | p13 | 0.070 | 0.536 |
| SNP_A-1807273 | 10 | 12698895 | rs7912882  | CAMK1D | p13 | 0.423 | 0.154 |
| SNP_A-8390763 | 10 | 12700517 | rs11257918 | CAMK1D | p13 | 0.259 | 0.834 |
| SNP_A-2241975 | 10 | 12709055 | rs11257922 | CAMK1D | p13 | 0.490 | 0.975 |
| SNP_A-2127934 | 10 | 12709525 | rs11595663 | CAMK1D | p13 | 0.264 | 0.918 |
| SNP_A-8562082 | 10 | 12717620 | rs17152037 | CAMK1D | p13 | 0.300 | 0.607 |
| SNP_A-8286980 | 10 | 12721626 | rs6602603  | CAMK1D | p13 | 0.405 | 0.897 |
| SNP_A-8318937 | 10 | 12722851 | rs10450540 | CAMK1D | p13 | 0.287 | 0.860 |
| SNP_A-8344907 | 10 | 12731061 | rs7921813  | CAMK1D | p13 | 0.116 | 0.771 |
| SNP_A-8653506 | 10 | 12731450 | rs12248346 | CAMK1D | p13 | 0.279 | 0.976 |
| SNP_A-8412541 | 10 | 12731582 | rs17495691 | CAMK1D | p13 | 0.120 | 0.660 |
| SNP_A-8410169 | 10 | 12735393 | rs7071404  | CAMK1D | p13 | 0.345 | 0.624 |
| SNP_A-8595078 | 10 | 12736126 | rs11257930 | CAMK1D | p13 | 0.477 | 0.234 |
| SNP_A-8641387 | 10 | 12736967 | rs4750247  | CAMK1D | p13 | 0.330 | 0.426 |
| SNP_A-2121832 | 10 | 12739541 | rs7905330  | CAMK1D | p13 | 0.458 | 0.433 |
| SNP_A-8423981 | 10 | 12741948 | rs11257932 | CAMK1D | p13 | 0.120 | 0.229 |
| SNP_A-2286665 | 10 | 12744197 | rs10752271 | CAMK1D | p13 | 0.088 | 0.161 |
| SNP_A-2000973 | 10 | 12746743 | rs4417163  | CAMK1D | p13 | 0.452 | 0.098 |
| SNP_A-2100883 | 10 | 12747804 | rs10906199 | CAMK1D | p13 | 0.211 | 0.544 |
| SNP_A-4286379 | 10 | 12749730 | rs7091959  | CAMK1D | p13 | 0.347 | 0.904 |
| SNP_A-8498736 | 10 | 12757339 | rs10795975 | CAMK1D | p13 | 0.466 | 0.105 |
| SNP_A-8555611 | 10 | 12760690 | rs4747996  | CAMK1D | p13 | 0.346 | 0.841 |
| SNP_A-2046604 | 10 | 12761513 | rs7893280  | CAMK1D | p13 | 0.089 | 0.152 |
| SNP_A-1995627 | 10 | 12762565 | rs10508446 | CAMK1D | p13 | 0.346 | 0.724 |
| SNP_A-8482203 | 10 | 12764818 | rs4520494  | CAMK1D | p13 | 0.351 | 0.451 |
| SNP_A-8451250 | 10 | 12766067 | rs2895526  | CAMK1D | p13 | 0.456 | 0.159 |
| SNP_A-1995628 | 10 | 12783648 | rs2399864  | CAMK1D | p13 | 0.373 | 0.951 |
| SNP_A-1913139 | 10 | 12784342 | rs4623785  | CAMK1D | p13 | 0.053 | 0.812 |
| SNP_A-8465069 | 10 | 12787534 | rs4237425  | CAMK1D | p13 | 0.346 | 0.736 |
| SNP_A-8430451 | 10 | 12787678 | rs11257948 | CAMK1D | p13 | 0.304 | 0.352 |
| SNP_A-8415106 | 10 | 12788822 | rs4750249  | CAMK1D | p13 | 0.227 | 0.816 |
| SNP_A-8446711 | 10 | 12801690 | rs7923465  | CAMK1D | p13 | 0.483 | 0.232 |
| SNP_A-4267327 | 10 | 12802309 | rs723211   | CAMK1D | p13 | 0.486 | 0.388 |
| SNP_A-1995632 | 10 | 12802482 | rs723210   | CAMK1D | p13 | 0.488 | 0.412 |
| SNP_A-4245317 | 10 | 12811686 | rs7077423  | CAMK1D | p13 | 0.319 | 0.709 |
| SNP_A-2000974 | 10 | 12818978 | rs4750253  | CAMK1D | p13 | 0.443 | 0.872 |
| SNP_A-4213319 | 10 | 12832547 | rs17152197 | CAMK1D | p13 | 0.175 | 0.575 |
| SNP_A-8381455 | 10 | 12833952 | rs11596618 | CAMK1D | p13 | 0.138 | 0.274 |
| SNP_A-4229534 | 10 | 12834342 | rs17152205 | CAMK1D | p13 | 0.172 | 0.378 |
| SNP_A-8632789 | 10 | 12837291 | rs10906218 | CAMK1D | p13 | 0.131 | 0.396 |
| SNP_A-8281253 | 10 | 12837764 | rs4132050  | CAMK1D | p13 | 0.338 | 0.645 |
| SNP_A-1995641 | 10 | 12837834 | rs41380844 | CAMK1D | p13 | 0.206 | 0.450 |
| SNP_A-8286981 | 10 | 12837860 | rs4132049  | CAMK1D | p13 | 0.281 | 0.329 |
| SNP_A-1828085 | 10 | 12838603 | rs4078402  | CAMK1D | p13 | 0.363 | 0.346 |
| SNP_A-2071684 | 10 | 12840721 | rs10752275 | CAMK1D | p13 | 0.102 | 0.467 |
| SNP_A-8348419 | 10 | 12841507 | rs2989500  | CAMK1D | p13 | 0.371 | 0.844 |
| SNP_A-1897320 | 10 | 12844670 | rs11257974 | CAMK1D | p13 | 0.111 | 0.349 |
| SNP_A-2304748 | 10 | 12845297 | rs3802573  | CAMK1D | p13 | 0.110 | 0.533 |
| SNP_A-4268197 | 10 | 12845383 | rs3802572  | CAMK1D | p13 | 0.494 | 0.445 |
| SNP_A-2000976 | 10 | 12845436 | rs3802570  | CAMK1D | p13 | 0.335 | 0.535 |
| SNP_A-8312142 | 10 | 12849037 | rs11257979 | CAMK1D | p13 | 0.072 | 0.905 |
| SNP_A-1944793 | 10 | 12849657 | rs7910587  | CAMK1D | p13 | 0.216 | 0.097 |
| SNP_A-8333183 | 10 | 12850576 | rs2482052  | CAMK1D | p13 | 0.204 | 0.436 |
| SNP_A-1898790 | 10 | 12854906 | rs3781076  | CAMK1D | p13 | 0.117 | 0.333 |
| SNP_A-8554443 | 10 | 12854934 | rs2493775  | CAMK1D | p13 | 0.208 | 0.550 |
| SNP_A-8346697 | 10 | 12859895 | rs4750258  | CAMK1D | p13 | 0.286 | 0.505 |
| SNP_A-2057033 | 10 | 12860217 | rs3802569  | CAMK1D | p13 | 0.223 | 0.682 |
| SNP_A-1847369 | 10 | 12866039 | rs3802560  | CAMK1D | p13 | 0.222 | 0.711 |
| SNP_A-2200877 | 10 | 12868296 | rs10906223 | CAMK1D | p13 | 0.217 | 0.958 |
| SNP_A-2033615 | 10 | 12868459 | rs914328   | CAMK1D | p13 | 0.217 | 0.958 |
| SNP_A-8653306 | 10 | 12870975 | rs12359004 | CAMK1D | p13 | 0.053 | 0.161 |
| SNP_A-8328214 | 10 | 12871675 | rs12767282 | CAMK1D | p13 | 0.166 | 0.708 |
| SNP_A-1931100 | 10 | 12872599 | rs4747999  | CAMK1D | p13 | 0.427 | 0.867 |
| SNP_A-8534490 | 10 | 12873618 | rs11257991 | CAMK1D | p13 | 0.099 | 0.343 |
| SNP_A-8281277 | 10 | 12874932 | rs928336   | CAMK1D | p13 | 0.444 | 0.784 |
| SNP_A-1995659 | 10 | 12875051 | rs928337   | CAMK1D | p13 | 0.393 | 0.524 |
| SNP_A-1995661 | 10 | 12875594 | rs2493766  | CAMK1D | p13 | 0.375 | 0.573 |
| SNP_A-8693709 | 10 | 12875731 | rs11596463 | CAMK1D | p13 | 0.328 | 0.322 |
| SNP_A-1876279 | 10 | 12876178 | rs10906224 | CAMK1D | p13 | 0.333 | 0.398 |
| SNP_A-1995662 | 10 | 12876488 | rs17152268 | CAMK1D | p13 | 0.073 | 0.176 |

|               |    |           |            |          |        |       |       |
|---------------|----|-----------|------------|----------|--------|-------|-------|
| SNP_A-8281665 | 10 | 12876558  | rs1929389  | CAMK1D   | p13    | 0.447 | 0.743 |
| SNP_A-8281666 | 10 | 12876607  | rs1929388  | CAMK1D   | p13    | 0.418 | 0.747 |
| SNP_A-4213320 | 10 | 12876845  | rs1929383  | CAMK1D   | p13    | 0.418 | 0.821 |
| SNP_A-4233438 | 10 | 12877448  | rs34278684 | CAMK1D   | p13    | 0.069 | 0.069 |
| SNP_A-1936417 | 10 | 12880848  | rs1556408  | CAMK1D   | p13    | 0.375 | 0.695 |
| SNP_A-1899081 | 10 | 12882185  | rs41402449 | CAMK1D   | p13    | 0.060 | 0.114 |
| SNP_A-1806035 | 10 | 12887844  | rs4750267  | CAMK1D   | p13    | 0.387 | 0.396 |
| SNP_A-8584436 | 10 | 12888039  | rs17136885 | CAMK1D   | p13    | 0.083 | 0.229 |
| SNP_A-8488232 | 10 | 12890242  | rs1999369  | CAMK1D   | p13    | 0.088 | 0.272 |
| SNP_A-2111454 | 10 | 12890474  | rs10906229 | CAMK1D   | p13    | 0.364 | 0.377 |
| SNP_A-8659980 | 10 | 12891662  | rs12358381 | CAMK1D   | p13    | 0.279 | 0.034 |
| SNP_A-2195214 | 10 | 12895162  | rs11258009 | CAMK1D   | p13    | 0.106 | 0.192 |
| SNP_A-8700699 | 10 | 12901951  | rs1630635  | CAMK1D   | p13    | 0.086 | 0.430 |
| SNP_A-2227562 | 10 | 12902342  | rs1627294  | CAMK1D   | p13    | 0.207 | 0.564 |
| SNP_A-2179057 | 10 | 12904316  | rs1644428  | CAMK1D   | p13    | 0.289 | 0.605 |
| SNP_A-8648723 | 10 | 12904400  | rs1757052  | CAMK1D   | p13    | 0.289 | 0.916 |
| SNP_A-8331063 | 10 | 12907604  | rs1757051  | CAMK1D   | p13    | 0.253 | 0.440 |
| SNP_A-2059103 | 10 | 12908310  | rs1644391  | CAMK1D   | p13    | 0.293 | 0.730 |
| SNP_A-2124948 | 10 | 30771645  | rs8176983  | MAP3K8   | p11.23 | 0.092 | 0.577 |
| SNP_A-1805768 | 10 | 30771666  | rs8176984  | MAP3K8   | p11.23 | 0.092 | 0.898 |
| SNP_A-1908602 | 10 | 30774889  | rs598009   | MAP3K8   | p11.23 | 0.214 | 0.083 |
| SNP_A-2243084 | 10 | 30779064  | rs303428   | MAP3K8   | p11.23 | 0.382 | 0.063 |
| SNP_A-8290587 | 10 | 30780385  | rs303426   | MAP3K8   | p11.23 | 0.378 | 0.092 |
| SNP_A-1924274 | 10 | 30784089  | rs650788   | MAP3K8   | p11.23 | 0.138 | 0.119 |
| SNP_A-2175385 | 10 | 30788504  | rs8177029  | MAP3K8   | p11.23 | 0.108 | 0.944 |
| SNP_A-2136321 | 10 | 49197212  | rs7068398  | MAPK8    | q11.22 | 0.211 | 0.906 |
| SNP_A-2000433 | 10 | 49217160  | rs1112268  | MAPK8    | q11.22 | 0.214 | 0.665 |
| SNP_A-4222841 | 10 | 49220700  | rs6537561  | MAPK8    | q11.22 | 0.428 | 0.941 |
| SNP_A-4220841 | 10 | 49235992  | rs2590391  | MAPK8    | q11.22 | 0.214 | 0.521 |
| SNP_A-2257035 | 10 | 49239736  | rs17697885 | MAPK8    | q11.22 | 0.098 | 0.627 |
| SNP_A-4283442 | 10 | 49246884  | rs1881735  | MAPK8    | q11.22 | 0.214 | 0.696 |
| SNP_A-2163878 | 10 | 49261724  | rs2698761  | MAPK8    | q11.22 | 0.429 | 0.885 |
| SNP_A-4272127 | 10 | 49262758  | rs17010430 | MAPK8    | q11.22 | 0.055 | 0.385 |
| SNP_A-1781918 | 10 | 49264246  | rs10857560 | MAPK8    | q11.22 | 0.432 | 0.760 |
| SNP_A-1816092 | 10 | 49265870  | rs17697960 | MAPK8    | q11.22 | 0.111 | 0.569 |
| SNP_A-8497559 | 10 | 49275145  | rs2440861  | MAPK8    | q11.22 | 0.312 | 0.959 |
| SNP_A-8675548 | 10 | 49278796  | rs17697978 | MAPK8    | q11.22 | 0.062 | 0.679 |
| SNP_A-2146965 | 10 | 49279184  | rs17698002 | MAPK8    | q11.22 | 0.061 | 0.642 |
| SNP_A-4248684 | 10 | 49290273  | rs9888128  | MAPK8    | q11.22 | 0.427 | 0.867 |
| SNP_A-8329336 | 10 | 49297918  | rs2289805  | MAPK8    | q11.22 | 0.162 | 0.925 |
| SNP_A-2000441 | 10 | 49312152  | rs11101320 | MAPK8    | q11.22 | 0.425 | 0.688 |
| SNP_A-2000443 | 10 | 49312216  | rs7086275  | MAPK8    | q11.22 | 0.425 | 0.681 |
| SNP_A-1789847 | 10 | 75247849  | rs7080350  | CAMK2G   | q22.2  | 0.433 | 0.233 |
| SNP_A-2044332 | 10 | 75287350  | rs2664280  | CAMK2G   | q22.2  | 0.476 | 0.642 |
| SNP_A-2176677 | 10 | 75302766  | rs2675671  | CAMK2G   | q22.2  | 0.472 | 0.625 |
| SNP_A-8327814 | 11 | 65124899  | rs10791821 | MAP3K11  | q13.1  | 0.252 | 0.810 |
| SNP_A-2011704 | 11 | 65128180  | rs1151488  | MAP3K11  | q13.1  | 0.296 | 0.375 |
| SNP_A-8461425 | 11 | 65129094  | rs7116712  | MAP3K11  | q13.1  | 0.428 | 0.443 |
| SNP_A-8708739 | 12 | 52166920  | rs7958457  | MAP3K12  | q13.13 | 0.119 | 0.921 |
| SNP_A-4272432 | 12 | 110765396 | rs4767068  | MAPKAPK5 | q24.12 | 0.182 | 0.380 |
| SNP_A-8385458 | 12 | 110769925 | rs4346023  | MAPKAPK5 | q24.12 | 0.292 | 0.943 |
| SNP_A-8459039 | 12 | 110807399 | rs12315146 | MAPKAPK5 | q24.13 | 0.092 | 0.387 |
| SNP_A-4219242 | 12 | 110809229 | rs12423041 | MAPKAPK5 | q24.13 | 0.157 | 0.808 |
| SNP_A-1892912 | 12 | 110811440 | rs16941724 | MAPKAPK5 | q24.13 | 0.067 | 0.252 |
| SNP_A-2270138 | 12 | 118590759 | rs6490267  | PRKAB1   | q24.23 | 0.329 | 0.731 |
| SNP_A-4303936 | 12 | 118600877 | rs278151   | PRKAB1   | q24.23 | 0.312 | 0.877 |
| SNP_A-8478035 | 12 | 118603566 | rs4213     | PRKAB1   | q24.23 | 0.311 | 0.831 |
| SNP_A-8374131 | 12 | 120164843 | rs11065504 | CAMKK2   | q24.31 | 0.344 | 0.281 |
| SNP_A-8695002 | 12 | 120165521 | rs1653591  | CAMKK2   | q24.31 | 0.221 | 0.148 |
| SNP_A-2062663 | 12 | 120165919 | rs1140886  | CAMKK2   | q24.31 | 0.278 | 0.565 |
| SNP_A-2201096 | 12 | 120166070 | rs1063843  | CAMKK2   | q24.31 | 0.222 | 0.135 |
| SNP_A-2167062 | 12 | 120169571 | rs2686342  | CAMKK2   | q24.31 | 0.222 | 0.193 |
| SNP_A-8437553 | 12 | 120170167 | rs3794208  | CAMKK2   | q24.31 | 0.129 | 0.656 |
| SNP_A-2113248 | 12 | 120171857 | rs2288693  | CAMKK2   | q24.31 | 0.050 | 0.225 |
| SNP_A-8330751 | 12 | 120179905 | rs2686346  | CAMKK2   | q24.31 | 0.463 | 0.447 |
| SNP_A-8332641 | 12 | 120192654 | rs1718123  | CAMKK2   | q24.31 | 0.498 | 0.212 |
| SNP_A-4257403 | 12 | 120199778 | rs9805130  | CAMKK2   | q24.31 | 0.411 | 0.271 |
| SNP_A-8353111 | 14 | 50008958  | rs4898658  | MAP4K5   | q22.1  | 0.075 | 0.512 |
| SNP_A-4260067 | 14 | 50017222  | rs11157745 | MAP4K5   | q22.1  | 0.088 | 0.687 |
| SNP_A-2092571 | 14 | 50038960  | rs2180499  | MAP4K5   | q22.1  | 0.053 | 0.566 |
| SNP_A-4282792 | 14 | 50039198  | rs2144975  | MAP4K5   | q22.1  | 0.052 | 0.589 |
| SNP_A-8498776 | 14 | 50043382  | rs17718580 | MAP4K5   | q22.1  | 0.094 | 0.091 |
| SNP_A-8388911 | 14 | 50058668  | rs12882884 | MAP4K5   | q22.1  | 0.137 | 0.820 |
| SNP_A-4297690 | 14 | 50062686  | rs7160618  | MAP4K5   | q22.1  | 0.073 | 0.448 |

|               |    |          |            |           |       |       |       |
|---------------|----|----------|------------|-----------|-------|-------|-------|
| SNP_A-1874459 | 14 | 54599873 | rs3742564  | MAPK1IP1L | q22.3 | 0.357 | 0.739 |
| SNP_A-1911919 | 14 | 54606159 | rs17128145 | MAPK1IP1L | q22.3 | 0.350 | 0.761 |
| SNP_A-1931984 | 14 | 60859258 | rs4902046  | PRKCH     | q23.1 | 0.063 | 0.319 |
| SNP_A-8636880 | 14 | 60860747 | rs8017122  | PRKCH     | q23.1 | 0.086 | 0.442 |
| SNP_A-8713785 | 14 | 60868578 | rs12101174 | PRKCH     | q23.1 | 0.074 | 0.166 |
| SNP_A-4294311 | 14 | 60883016 | rs1957902  | PRKCH     | q23.1 | 0.301 | 0.682 |
| SNP_A-8529720 | 14 | 60885908 | rs6573381  | PRKCH     | q23.1 | 0.088 | 0.060 |
| SNP_A-8463426 | 14 | 60886593 | rs1033910  | PRKCH     | q23.1 | 0.271 | 0.919 |
| SNP_A-1829740 | 14 | 60887286 | rs2181987  | PRKCH     | q23.1 | 0.084 | 0.215 |
| SNP_A-8535987 | 14 | 60888413 | rs8012072  | PRKCH     | q23.1 | 0.178 | 0.672 |
| SNP_A-8672839 | 14 | 60895660 | rs12437249 | PRKCH     | q23.1 | 0.264 | 0.525 |
| SNP_A-2159814 | 14 | 60897022 | rs6573385  | PRKCH     | q23.1 | 0.083 | 0.083 |
| SNP_A-2288081 | 14 | 60901613 | rs17098278 | PRKCH     | q23.1 | 0.112 | 0.133 |
| SNP_A-1906709 | 14 | 60901663 | rs17098279 | PRKCH     | q23.1 | 0.054 | 0.521 |
| SNP_A-8324232 | 14 | 60909131 | rs8009446  | PRKCH     | q23.1 | 0.100 | 0.584 |
| SNP_A-8511480 | 14 | 60915883 | rs10149384 | PRKCH     | q23.1 | 0.145 | 0.318 |
| SNP_A-8472809 | 14 | 60922546 | rs1886467  | PRKCH     | q23.1 | 0.158 | 0.192 |
| SNP_A-4240469 | 14 | 60922603 | rs12100914 | PRKCH     | q23.1 | 0.103 | 0.523 |
| SNP_A-8294325 | 14 | 60923549 | rs4902052  | PRKCH     | q23.1 | 0.223 | 0.116 |
| SNP_A-2298831 | 14 | 60929984 | rs1957907  | PRKCH     | q23.1 | 0.071 | 0.938 |
| SNP_A-8540419 | 14 | 60931057 | rs1957910  | PRKCH     | q23.1 | 0.070 | 0.562 |
| SNP_A-8439856 | 14 | 60935032 | rs1957912  | PRKCH     | q23.1 | 0.380 | 0.913 |
| SNP_A-8701557 | 14 | 60936263 | rs12887002 | PRKCH     | q23.1 | 0.306 | 0.512 |
| SNP_A-8409595 | 14 | 60944127 | rs767757   | PRKCH     | q23.1 | 0.386 | 0.645 |
| SNP_A-1937739 | 14 | 60944201 | rs767755   | PRKCH     | q23.1 | 0.322 | 0.956 |
| SNP_A-8459867 | 14 | 60946310 | rs10149839 | PRKCH     | q23.1 | 0.311 | 0.898 |
| SNP_A-8301275 | 14 | 60949570 | rs12892443 | PRKCH     | q23.1 | 0.287 | 0.590 |
| SNP_A-4249665 | 14 | 60950281 | rs1536014  | PRKCH     | q23.1 | 0.094 | 0.033 |
| SNP_A-8615384 | 14 | 60952025 | rs1570718  | PRKCH     | q23.1 | 0.229 | 0.960 |
| SNP_A-8612050 | 14 | 60955193 | rs4605077  | PRKCH     | q23.1 | 0.178 | 0.690 |
| SNP_A-8486057 | 14 | 60955610 | rs11627158 | PRKCH     | q23.1 | 0.178 | 0.690 |
| SNP_A-2089042 | 14 | 60956159 | rs7155214  | PRKCH     | q23.1 | 0.177 | 0.653 |
| SNP_A-8299147 | 14 | 60956523 | rs12590425 | PRKCH     | q23.1 | 0.272 | 0.204 |
| SNP_A-8612265 | 14 | 60957230 | rs11852192 | PRKCH     | q23.1 | 0.094 | 0.028 |
| SNP_A-8712360 | 14 | 60959051 | rs17098343 | PRKCH     | q23.1 | 0.378 | 0.635 |
| SNP_A-2301229 | 14 | 60959560 | rs11627926 | PRKCH     | q23.1 | 0.258 | 0.151 |
| SNP_A-2238813 | 14 | 60962944 | rs11621346 | PRKCH     | q23.1 | 0.229 | 0.581 |
| SNP_A-1788892 | 14 | 60968333 | rs17098351 | PRKCH     | q23.1 | 0.294 | 0.908 |
| SNP_A-2039744 | 14 | 60968592 | rs17098356 | PRKCH     | q23.1 | 0.281 | 0.704 |
| SNP_A-2129880 | 14 | 60969235 | rs12590817 | PRKCH     | q23.1 | 0.203 | 0.912 |
| SNP_A-8641436 | 14 | 60986931 | rs2296274  | PRKCH     | q23.1 | 0.230 | 0.417 |
| SNP_A-8651310 | 14 | 60997338 | rs8010084  | PRKCH     | q23.1 | 0.070 | 0.238 |
| SNP_A-4240499 | 14 | 61003289 | rs912617   | PRKCH     | q23.1 | 0.078 | 0.504 |
| SNP_A-2267277 | 14 | 61004561 | rs8019776  | PRKCH     | q23.1 | 0.050 | 0.641 |
| SNP_A-2003779 | 14 | 61005927 | rs8011286  | PRKCH     | q23.1 | 0.055 | 0.920 |
| SNP_A-8641445 | 14 | 61006917 | rs3783787  | PRKCH     | q23.1 | 0.269 | 0.957 |
| SNP_A-4280842 | 14 | 61006977 | rs3783786  | PRKCH     | q23.1 | 0.223 | 0.934 |
| SNP_A-4294328 | 14 | 61007554 | rs10483734 | PRKCH     | q23.1 | 0.060 | 0.577 |
| SNP_A-8641448 | 14 | 61007908 | rs4899049  | PRKCH     | q23.1 | 0.057 | 0.989 |
| SNP_A-1793744 | 14 | 61009324 | rs11621877 | PRKCH     | q23.1 | 0.270 | 0.314 |
| SNP_A-8462185 | 14 | 61010663 | rs2181985  | PRKCH     | q23.1 | 0.275 | 0.310 |
| SNP_A-8312482 | 14 | 61010694 | rs2147539  | PRKCH     | q23.1 | 0.349 | 0.495 |
| SNP_A-1951245 | 14 | 61013639 | rs4899050  | PRKCH     | q23.1 | 0.236 | 0.315 |
| SNP_A-8532254 | 14 | 61014635 | rs1886461  | PRKCH     | q23.1 | 0.286 | 0.505 |
| SNP_A-2138779 | 14 | 61014730 | rs1886462  | PRKCH     | q23.1 | 0.089 | 0.294 |
| SNP_A-2223822 | 14 | 61017755 | rs8008798  | PRKCH     | q23.1 | 0.142 | 0.408 |
| SNP_A-8642218 | 14 | 61018804 | rs1886464  | PRKCH     | q23.1 | 0.151 | 0.574 |
| SNP_A-2250360 | 14 | 61022592 | rs17098514 | PRKCH     | q23.1 | 0.062 | 0.677 |
| SNP_A-8716034 | 14 | 61022928 | rs3783770  | PRKCH     | q23.1 | 0.104 | 0.459 |
| SNP_A-8642254 | 14 | 61026577 | rs4902064  | PRKCH     | q23.1 | 0.173 | 0.901 |
| SNP_A-1891340 | 14 | 61026753 | rs17098533 | PRKCH     | q23.1 | 0.108 | 0.366 |
| SNP_A-4282562 | 14 | 61028043 | rs17098542 | PRKCH     | q23.1 | 0.132 | 0.539 |
| SNP_A-8545275 | 14 | 61030659 | rs12433533 | PRKCH     | q23.1 | 0.137 | 0.387 |
| SNP_A-8677144 | 14 | 61030926 | rs12437374 | PRKCH     | q23.1 | 0.111 | 0.516 |
| SNP_A-2200645 | 14 | 61031163 | rs12897140 | PRKCH     | q23.1 | 0.132 | 0.691 |
| SNP_A-8513807 | 14 | 61035197 | rs10459519 | PRKCH     | q23.1 | 0.137 | 0.570 |
| SNP_A-8598249 | 14 | 61042568 | rs2245448  | PRKCH     | q23.1 | 0.235 | 0.697 |
| SNP_A-8373742 | 14 | 61045858 | rs1088681  | PRKCH     | q23.1 | 0.151 | 0.556 |
| SNP_A-8462507 | 14 | 61048031 | rs1091679  | PRKCH     | q23.1 | 0.166 | 0.555 |
| SNP_A-8469231 | 14 | 61050277 | rs2249032  | PRKCH     | q23.1 | 0.096 | 0.448 |
| SNP_A-8642978 | 14 | 61051517 | rs3783759  | PRKCH     | q23.1 | 0.212 | 0.200 |
| SNP_A-8482974 | 14 | 61053696 | rs3751289  | PRKCH     | q23.1 | 0.199 | 0.671 |
| SNP_A-2273834 | 14 | 61054437 | rs2252267  | PRKCH     | q23.1 | 0.281 | 0.311 |
| SNP_A-8595777 | 14 | 61054490 | rs3751295  | PRKCH     | q23.1 | 0.095 | 0.845 |

|               |    |          |            |         |        |       |       |
|---------------|----|----------|------------|---------|--------|-------|-------|
| SNP_A-2276658 | 14 | 61054788 | rs4312236  | PRKCH   | q23.1  | 0.095 | 0.864 |
| SNP_A-2133624 | 14 | 61058766 | rs10134093 | PRKCH   | q23.1  | 0.109 | 0.791 |
| SNP_A-8642997 | 14 | 61059814 | rs12586812 | PRKCH   | q23.1  | 0.221 | 0.368 |
| SNP_A-4233844 | 14 | 61060072 | rs10483742 | PRKCH   | q23.1  | 0.105 | 0.941 |
| SNP_A-1898268 | 14 | 61060614 | rs12883769 | PRKCH   | q23.1  | 0.078 | 0.911 |
| SNP_A-8368664 | 14 | 61062153 | rs1092183  | PRKCH   | q23.1  | 0.279 | 0.742 |
| SNP_A-1834511 | 14 | 61068145 | rs8013398  | PRKCH   | q23.1  | 0.108 | 0.965 |
| SNP_A-2166272 | 14 | 61068370 | rs2184634  | PRKCH   | q23.1  | 0.107 | 0.945 |
| SNP_A-1811178 | 14 | 61069272 | rs1091678  | PRKCH   | q23.1  | 0.298 | 0.880 |
| SNP_A-2310675 | 14 | 61069456 | rs1088677  | PRKCH   | q23.1  | 0.120 | 0.714 |
| SNP_A-8496783 | 14 | 61072425 | rs2950274  | PRKCH   | q23.1  | 0.121 | 0.314 |
| SNP_A-8643707 | 14 | 61073931 | rs1088671  | PRKCH   | q23.1  | 0.158 | 0.144 |
| SNP_A-8643708 | 14 | 61074052 | rs1088672  | PRKCH   | q23.1  | 0.161 | 0.121 |
| SNP_A-8356568 | 14 | 61079359 | rs2246850  | PRKCH   | q23.1  | 0.176 | 0.059 |
| SNP_A-8650239 | 14 | 61079990 | rs3783754  | PRKCH   | q23.1  | 0.110 | 0.298 |
| SNP_A-2223910 | 14 | 61080552 | rs10483743 | PRKCH   | q23.1  | 0.069 | 0.211 |
| SNP_A-8367118 | 14 | 61083587 | rs10138449 | PRKCH   | q23.1  | 0.109 | 0.573 |
| SNP_A-1848490 | 14 | 61084042 | rs2184633  | PRKCH   | q23.1  | 0.245 | 0.605 |
| SNP_A-2003824 | 14 | 70270685 | rs6573978  | MAP3K9  | q24.2  | 0.098 | 0.344 |
| SNP_A-2248156 | 14 | 70271557 | rs4899367  | MAP3K9  | q24.2  | 0.067 | 0.154 |
| SNP_A-4297560 | 14 | 70272403 | rs4141095  | MAP3K9  | q24.2  | 0.099 | 0.371 |
| SNP_A-8356985 | 14 | 70274122 | rs8011047  | MAP3K9  | q24.2  | 0.128 | 0.489 |
| SNP_A-4295038 | 14 | 70281911 | rs10483834 | MAP3K9  | q24.2  | 0.262 | 0.430 |
| SNP_A-8638760 | 14 | 70282567 | rs2269946  | MAP3K9  | q24.2  | 0.052 | 0.174 |
| SNP_A-2208009 | 14 | 70285133 | rs2332457  | MAP3K9  | q24.2  | 0.426 | 0.224 |
| SNP_A-2229795 | 14 | 70288963 | rs4902846  | MAP3K9  | q24.2  | 0.297 | 0.599 |
| SNP_A-8638763 | 14 | 70289969 | rs4902848  | MAP3K9  | q24.2  | 0.433 | 0.651 |
| SNP_A-8638766 | 14 | 70291818 | rs1476609  | MAP3K9  | q24.2  | 0.143 | 0.446 |
| SNP_A-2130417 | 14 | 70297666 | rs3814872  | MAP3K9  | q24.2  | 0.109 | 0.473 |
| SNP_A-2065586 | 14 | 70298454 | rs9323548  | MAP3K9  | q24.2  | 0.296 | 0.437 |
| SNP_A-8450780 | 14 | 70298991 | rs12886990 | MAP3K9  | q24.2  | 0.296 | 0.452 |
| SNP_A-2229802 | 14 | 70299034 | rs886600   | MAP3K9  | q24.2  | 0.406 | 0.610 |
| SNP_A-2070980 | 14 | 70302336 | rs8019448  | MAP3K9  | q24.2  | 0.330 | 0.480 |
| SNP_A-1872624 | 14 | 70302669 | rs4902852  | MAP3K9  | q24.2  | 0.108 | 0.467 |
| SNP_A-2264291 | 14 | 70305756 | rs17176985 | MAP3K9  | q24.2  | 0.266 | 0.442 |
| SNP_A-8564526 | 14 | 70316721 | rs2158531  | MAP3K9  | q24.2  | 0.304 | 0.342 |
| SNP_A-8536457 | 14 | 70318847 | rs11621269 | MAP3K9  | q24.2  | 0.493 | 0.259 |
| SNP_A-2050009 | 14 | 70318983 | rs10141804 | MAP3K9  | q24.2  | 0.294 | 0.484 |
| SNP_A-1780365 | 14 | 70319555 | rs17108533 | MAP3K9  | q24.2  | 0.086 | 0.782 |
| SNP_A-1841348 | 14 | 70322822 | rs17177097 | MAP3K9  | q24.2  | 0.314 | 0.591 |
| SNP_A-8565267 | 14 | 70324451 | rs1034769  | MAP3K9  | q24.2  | 0.108 | 0.470 |
| SNP_A-8461892 | 14 | 70325188 | rs17108539 | MAP3K9  | q24.2  | 0.245 | 0.507 |
| SNP_A-8608551 | 14 | 70325249 | rs17108540 | MAP3K9  | q24.2  | 0.086 | 0.780 |
| SNP_A-8655808 | 14 | 70325659 | rs11626707 | MAP3K9  | q24.2  | 0.475 | 0.431 |
| SNP_A-2227015 | 14 | 70326120 | rs12590049 | MAP3K9  | q24.2  | 0.316 | 0.629 |
| SNP_A-1936193 | 14 | 70327353 | rs12437113 | MAP3K9  | q24.2  | 0.160 | 0.397 |
| SNP_A-1917047 | 14 | 70332685 | rs17766621 | MAP3K9  | q24.2  | 0.370 | 0.639 |
| SNP_A-8399146 | 14 | 70334426 | rs17108554 | MAP3K9  | q24.2  | 0.295 | 0.684 |
| SNP_A-8309803 | 14 | 70338864 | rs4899371  | MAP3K9  | q24.2  | 0.380 | 0.913 |
| SNP_A-1782420 | 14 | 70340808 | rs2023955  | MAP3K9  | q24.2  | 0.073 | 0.107 |
| SNP_A-8630495 | 14 | 70341102 | rs731571   | MAP3K9  | q24.2  | 0.246 | 0.458 |
| SNP_A-1845711 | 14 | 70344332 | rs10873243 | MAP3K9  | q24.2  | 0.301 | 0.442 |
| SNP_A-1953652 | 14 | 70344430 | rs7155910  | MAP3K9  | q24.2  | 0.085 | 0.423 |
| SNP_A-8690902 | 14 | 70344475 | rs11158882 | MAP3K9  | q24.2  | 0.303 | 0.423 |
| SNP_A-2274082 | 15 | 39859915 | rs1106934  | MAPKBP1 | q15.1  | 0.162 | 0.518 |
| SNP_A-1906143 | 15 | 39878504 | rs2925339  | MAPKBP1 | q15.1  | 0.322 | 0.156 |
| SNP_A-2085945 | 15 | 39878677 | rs1197671  | MAPKBP1 | q15.1  | 0.305 | 0.370 |
| SNP_A-8522318 | 15 | 39888986 | rs16972089 | MAPKBP1 | q15.1  | 0.165 | 0.158 |
| SNP_A-8311348 | 15 | 39889577 | rs12440605 | MAPKBP1 | q15.1  | 0.484 | 0.957 |
| SNP_A-8306551 | 15 | 50106988 | rs11636443 | MAPK6   | q21.2  | 0.431 | 0.159 |
| SNP_A-2272061 | 15 | 50127514 | rs8034167  | MAPK6   | q21.2  | 0.154 | 0.294 |
| SNP_A-1952547 | 15 | 64470005 | rs12899337 | MAP2K1  | q22.31 | 0.078 | 0.911 |
| SNP_A-1925869 | 15 | 64473824 | rs16953563 | MAP2K1  | q22.31 | 0.271 | 0.378 |
| SNP_A-8713578 | 15 | 64481485 | rs16949879 | MAP2K1  | q22.31 | 0.311 | 0.713 |
| SNP_A-1852767 | 15 | 64491503 | rs2053005  | MAP2K1  | q22.31 | 0.079 | 0.690 |
| SNP_A-8501008 | 15 | 64493559 | rs12909274 | MAP2K1  | q22.31 | 0.154 | 0.620 |
| SNP_A-1867883 | 15 | 64496440 | rs7168238  | MAP2K1  | q22.31 | 0.080 | 0.982 |
| SNP_A-8588910 | 15 | 64506335 | rs1432441  | MAP2K1  | q22.31 | 0.309 | 0.860 |
| SNP_A-1849420 | 15 | 64507780 | rs11856814 | MAP2K1  | q22.31 | 0.079 | 0.947 |
| SNP_A-1914187 | 15 | 64512399 | rs11632225 | MAP2K1  | q22.31 | 0.153 | 0.858 |
| SNP_A-1954607 | 15 | 64514651 | rs16949924 | MAP2K1  | q22.31 | 0.308 | 0.759 |
| SNP_A-8475137 | 15 | 64518339 | rs8036023  | MAP2K1  | q22.31 | 0.311 | 0.493 |
| SNP_A-8440548 | 15 | 64528441 | rs11629783 | MAP2K1  | q22.31 | 0.246 | 0.348 |
| SNP_A-1814659 | 15 | 64556238 | rs4075665  | MAP2K1  | q22.31 | 0.080 | 0.982 |

|               |    |          |            |           |        |       |       |
|---------------|----|----------|------------|-----------|--------|-------|-------|
| SNP_A-2148826 | 15 | 64559061 | rs4255740  | MAP2K1    | q22.31 | 0.307 | 0.661 |
| SNP_A-8697907 | 15 | 64560787 | rs11071894 | MAP2K1    | q22.31 | 0.087 | 0.248 |
| SNP_A-1801907 | 15 | 64561613 | rs11634062 | MAP2K1    | q22.31 | 0.150 | 0.789 |
| SNP_A-8551688 | 15 | 64563494 | rs12594592 | MAP2K1    | q22.31 | 0.149 | 0.374 |
| SNP_A-1935747 | 15 | 65624462 | rs2583587  | MAP2K5    | q23    | 0.235 | 0.129 |
| SNP_A-8360146 | 15 | 65650917 | rs16951010 | MAP2K5    | q23    | 0.086 | 0.813 |
| SNP_A-4286893 | 15 | 65668983 | rs6494673  | MAP2K5    | q23    | 0.086 | 0.813 |
| SNP_A-4291519 | 15 | 65669085 | rs4776366  | MAP2K5    | q23    | 0.094 | 0.834 |
| SNP_A-4239542 | 15 | 65673405 | rs10851775 | MAP2K5    | q23    | 0.084 | 0.842 |
| SNP_A-8312471 | 15 | 65679820 | rs3865018  | MAP2K5    | q23    | 0.280 | 0.764 |
| SNP_A-8421418 | 15 | 65679846 | rs17241808 | MAP2K5    | q23    | 0.467 | 0.327 |
| SNP_A-1920885 | 15 | 65687522 | rs1878700  | MAP2K5    | q23    | 0.091 | 0.939 |
| SNP_A-2298097 | 15 | 65687937 | rs1878699  | MAP2K5    | q23    | 0.395 | 0.943 |
| SNP_A-4221018 | 15 | 65688586 | rs12593494 | MAP2K5    | q23    | 0.240 | 0.104 |
| SNP_A-8710024 | 15 | 65692960 | rs11631249 | MAP2K5    | q23    | 0.149 | 0.102 |
| SNP_A-8417413 | 15 | 65696333 | rs12902812 | MAP2K5    | q23    | 0.280 | 0.745 |
| SNP_A-2256338 | 15 | 65701806 | rs2899728  | MAP2K5    | q23    | 0.085 | 0.748 |
| SNP_A-8344362 | 15 | 65708228 | rs8025889  | LOC728643 | q23    | 0.465 | 1.000 |
| SNP_A-8637497 | 15 | 65721221 | rs11631474 | MAP2K5    | q23    | 0.469 | 0.671 |
| SNP_A-2228598 | 15 | 65738204 | rs12438118 | MAP2K5    | q23    | 0.268 | 0.786 |
| SNP_A-4224043 | 15 | 65739445 | rs7170841  | MAP2K5    | q23    | 0.168 | 0.885 |
| SNP_A-8422674 | 15 | 65739976 | rs938875   | MAP2K5    | q23    | 0.457 | 0.763 |
| SNP_A-2123861 | 15 | 65746518 | rs8032675  | MAP2K5    | q23    | 0.458 | 0.815 |
| SNP_A-1823224 | 15 | 65768232 | rs16951125 | MAP2K5    | q23    | 0.085 | 0.201 |
| SNP_A-2060485 | 15 | 65771759 | rs4343227  | MAP2K5    | q23    | 0.171 | 0.998 |
| SNP_A-2127307 | 15 | 65774855 | rs4331293  | MAP2K5    | q23    | 0.288 | 0.778 |
| SNP_A-8658737 | 15 | 65789656 | rs3784695  | MAP2K5    | q23    | 0.481 | 0.484 |
| SNP_A-4239546 | 15 | 65796629 | rs6494691  | MAP2K5    | q23    | 0.184 | 0.707 |
| SNP_A-2293047 | 15 | 65801304 | rs10518738 | MAP2K5    | q23    | 0.170 | 0.996 |
| SNP_A-8711200 | 15 | 65802025 | rs10518739 | MAP2K5    | q23    | 0.451 | 0.779 |
| SNP_A-8711202 | 15 | 65802293 | rs11639267 | MAP2K5    | q23    | 0.171 | 0.851 |
| SNP_A-2293054 | 15 | 65806172 | rs10518740 | MAP2K5    | q23    | 0.091 | 0.971 |
| SNP_A-8645513 | 15 | 65816234 | rs3784705  | MAP2K5    | q23    | 0.169 | 0.925 |
| SNP_A-1921942 | 15 | 65823906 | rs12593813 | MAP2K5    | q23    | 0.354 | 0.927 |
| SNP_A-4254017 | 15 | 65824632 | rs11635424 | MAP2K5    | q23    | 0.354 | 0.927 |
| SNP_A-8494788 | 15 | 65827320 | rs12592315 | MAP2K5    | q23    | 0.496 | 0.686 |
| SNP_A-1930409 | 15 | 65834069 | rs16951231 | MAP2K5    | q23    | 0.095 | 0.473 |
| SNP_A-8512670 | 15 | 65837831 | rs7183639  | MAP2K5    | q23    | 0.097 | 0.400 |
| SNP_A-8347466 | 15 | 65837903 | rs7162980  | MAP2K5    | q23    | 0.247 | 0.934 |
| SNP_A-1957605 | 15 | 65842050 | rs868037   | MAP2K5    | q23    | 0.352 | 0.968 |
| SNP_A-2081211 | 15 | 65845033 | rs17244146 | MAP2K5    | q23    | 0.092 | 0.905 |
| SNP_A-1811749 | 15 | 65845701 | rs11071957 | MAP2K5    | q23    | 0.239 | 0.932 |
| SNP_A-8399897 | 15 | 65845957 | rs11071959 | MAP2K5    | q23    | 0.242 | 0.981 |
| SNP_A-8711233 | 15 | 65850029 | rs10518744 | MAP2K5    | q23    | 0.105 | 0.101 |
| SNP_A-8711235 | 15 | 65851299 | rs16951256 | MAP2K5    | q23    | 0.096 | 0.445 |
| SNP_A-8711241 | 15 | 65857673 | rs4539549  | MAP2K5    | q23    | 0.408 | 0.561 |
| SNP_A-2026619 | 15 | 65859129 | rs4489954  | MAP2K5    | q23    | 0.333 | 0.716 |
| SNP_A-2298200 | 15 | 65859329 | rs3784709  | MAP2K5    | q23    | 0.353 | 0.711 |
| SNP_A-2290742 | 15 | 65859435 | rs17244601 | MAP2K5    | q23    | 0.136 | 0.411 |
| SNP_A-8478894 | 15 | 65859581 | rs3784711  | MAP2K5    | q23    | 0.402 | 0.607 |
| SNP_A-2298955 | 15 | 65865472 | rs4451902  | MAP2K5    | q23    | 0.146 | 0.773 |
| SNP_A-1853662 | 15 | 65866142 | rs12593640 | MAP2K5    | q23    | 0.091 | 0.572 |
| SNP_A-4239548 | 15 | 65866615 | rs12593698 | MAP2K5    | q23    | 0.094 | 0.497 |
| SNP_A-8442634 | 15 | 65875958 | rs12905175 | MAP2K5    | q23    | 0.050 | 0.705 |
| SNP_A-2210511 | 15 | 65877754 | rs11856999 | MAP2K5    | q23    | 0.147 | 0.159 |
| SNP_A-2293119 | 15 | 65877878 | rs2127162  | MAP2K5    | q23    | 0.498 | 0.747 |
| SNP_A-2040764 | 15 | 65882139 | rs1026732  | MAP2K5    | q23    | 0.351 | 0.940 |
| SNP_A-8366379 | 16 | 1699795  | rs17135499 | MAPK8IP3  | p13.3  | 0.082 | 0.915 |
| SNP_A-8711954 | 16 | 1701320  | rs8059926  | MAPK8IP3  | p13.3  | 0.451 | 0.286 |
| SNP_A-8656410 | 16 | 1705214  | rs7197815  | MAPK8IP3  | p13.3  | 0.186 | 0.524 |
| SNP_A-1807499 | 16 | 1724143  | rs8049415  | MAPK8IP3  | p13.3  | 0.202 | 0.349 |
| SNP_A-8304299 | 16 | 1752973  | rs2294616  | MAPK8IP3  | p13.3  | 0.154 | 0.892 |
| SNP_A-4254678 | 16 | 1757432  | rs2575369  | MAPK8IP3  | p13.3  | 0.432 | 0.610 |
| SNP_A-1845900 | 16 | 23761929 | rs2188360  | PRKCB     | p12.1  | 0.248 | 0.978 |
| SNP_A-8374349 | 16 | 23772091 | rs7404095  | PRKCB     | p12.1  | 0.437 | 0.844 |
| SNP_A-2070924 | 16 | 23772225 | rs7404005  | PRKCB     | p12.1  | 0.230 | 0.542 |
| SNP_A-8490323 | 16 | 23773033 | rs2106375  | PRKCB     | p12.1  | 0.208 | 0.667 |
| SNP_A-4292296 | 16 | 23773724 | rs8056879  | PRKCB     | p12.1  | 0.365 | 0.663 |
| SNP_A-2089348 | 16 | 23773826 | rs17809041 | PRKCB     | p12.1  | 0.109 | 0.573 |
| SNP_A-4298603 | 16 | 23774158 | rs3785404  | PRKCB     | p12.1  | 0.158 | 0.876 |
| SNP_A-1876648 | 16 | 23774414 | rs11074583 | PRKCB     | p12.1  | 0.441 | 0.557 |
| SNP_A-2176135 | 16 | 23774524 | rs3785403  | PRKCB     | p12.1  | 0.387 | 0.955 |
| SNP_A-4248739 | 16 | 23775277 | rs2188355  | PRKCB     | p12.1  | 0.386 | 0.903 |
| SNP_A-1881140 | 16 | 23777018 | rs10852256 | PRKCB     | p12.1  | 0.443 | 0.252 |

|               |    |          |            |       |       |       |       |
|---------------|----|----------|------------|-------|-------|-------|-------|
| SNP_A-4257477 | 16 | 23784730 | rs3826260  | PRKCB | p12.1 | 0.209 | 0.816 |
| SNP_A-8588489 | 16 | 23784990 | rs3826259  | PRKCB | p12.1 | 0.492 | 0.930 |
| SNP_A-4196839 | 16 | 23789545 | rs8047317  | PRKCB | p12.1 | 0.444 | 0.735 |
| SNP_A-1785710 | 16 | 23790049 | rs1468130  | PRKCB | p12.1 | 0.496 | 0.446 |
| SNP_A-8530187 | 16 | 23795684 | rs9940072  | PRKCB | p12.1 | 0.499 | 0.445 |
| SNP_A-8583383 | 16 | 23798236 | rs4592664  | PRKCB | p12.1 | 0.183 | 0.197 |
| SNP_A-2181637 | 16 | 23799646 | rs1557671  | PRKCB | p12.1 | 0.242 | 0.985 |
| SNP_A-8622917 | 16 | 23810657 | rs3785396  | PRKCB | p12.1 | 0.267 | 0.231 |
| SNP_A-8369294 | 16 | 23817486 | rs11644907 | PRKCB | p12.1 | 0.324 | 0.293 |
| SNP_A-8414453 | 16 | 23819637 | rs10775269 | PRKCB | p12.1 | 0.430 | 0.255 |
| SNP_A-8402079 | 16 | 23831007 | rs1858871  | PRKCB | p12.1 | 0.419 | 0.488 |
| SNP_A-2050242 | 16 | 23832068 | rs6497704  | PRKCB | p12.1 | 0.051 | 0.245 |
| SNP_A-2004623 | 16 | 23833975 | rs3785394  | PRKCB | p12.1 | 0.369 | 0.618 |
| SNP_A-2064728 | 16 | 23839214 | rs2188356  | PRKCB | p12.1 | 0.447 | 0.263 |
| SNP_A-1789890 | 16 | 23846939 | rs12932420 | PRKCB | p12.1 | 0.439 | 0.196 |
| SNP_A-1860175 | 16 | 23852120 | rs8051531  | PRKCB | p12.1 | 0.385 | 0.691 |
| SNP_A-1890150 | 16 | 23852213 | rs8051700  | PRKCB | p12.1 | 0.431 | 0.607 |
| SNP_A-1866212 | 16 | 23857413 | rs8053880  | PRKCB | p12.1 | 0.381 | 0.700 |
| SNP_A-2248922 | 16 | 23857686 | rs8055831  | PRKCB | p12.1 | 0.380 | 0.652 |
| SNP_A-2172009 | 16 | 23861629 | rs17810486 | PRKCB | p12.1 | 0.058 | 0.162 |
| SNP_A-1915601 | 16 | 23862011 | rs195996   | PRKCB | p12.1 | 0.419 | 0.842 |
| SNP_A-8550101 | 16 | 23864466 | rs195999   | PRKCB | p12.1 | 0.431 | 0.478 |
| SNP_A-1827542 | 16 | 23866472 | rs7196543  | PRKCB | p12.1 | 0.364 | 0.592 |
| SNP_A-4297289 | 16 | 23866921 | rs1989647  | PRKCB | p12.1 | 0.363 | 0.833 |
| SNP_A-2093948 | 16 | 23871505 | rs9940479  | PRKCB | p12.1 | 0.153 | 0.630 |
| SNP_A-2140826 | 16 | 23871593 | rs120908   | PRKCB | p12.1 | 0.398 | 0.520 |
| SNP_A-2227424 | 16 | 23873587 | rs196004   | PRKCB | p12.1 | 0.399 | 0.409 |
| SNP_A-1890610 | 16 | 23883794 | rs4238948  | PRKCB | p12.1 | 0.364 | 0.251 |
| SNP_A-1900528 | 16 | 23884492 | rs196008   | PRKCB | p12.1 | 0.493 | 0.516 |
| SNP_A-8312987 | 16 | 23885388 | rs886116   | PRKCB | p12.1 | 0.066 | 0.406 |
| SNP_A-2112564 | 16 | 23891757 | rs2340988  | PRKCB | p12.1 | 0.463 | 0.266 |
| SNP_A-8601754 | 16 | 23893896 | rs2560401  | PRKCB | p12.1 | 0.050 | 0.658 |
| SNP_A-1797460 | 16 | 23894721 | rs2560402  | PRKCB | p12.1 | 0.161 | 0.081 |
| SNP_A-8432561 | 16 | 23896190 | rs196012   | PRKCB | p12.1 | 0.205 | 0.612 |
| SNP_A-8639169 | 16 | 23897168 | rs196015   | PRKCB | p12.1 | 0.168 | 0.540 |
| SNP_A-2111531 | 16 | 23905489 | rs7197785  | PRKCB | p12.1 | 0.431 | 0.614 |
| SNP_A-1901391 | 16 | 23914288 | rs4788192  | PRKCB | p12.1 | 0.393 | 0.939 |
| SNP_A-1900564 | 16 | 23921025 | rs7192816  | PRKCB | p12.1 | 0.393 | 0.990 |
| SNP_A-1817659 | 16 | 23922112 | rs11074598 | PRKCB | p12.1 | 0.435 | 0.376 |
| SNP_A-8312993 | 16 | 23923602 | rs10492795 | PRKCB | p12.1 | 0.060 | 0.202 |
| SNP_A-8600763 | 16 | 23925135 | rs195992   | PRKCB | p12.1 | 0.082 | 0.037 |
| SNP_A-1821397 | 16 | 23926364 | rs4788423  | PRKCB | p12.1 | 0.358 | 0.897 |
| SNP_A-2273154 | 16 | 23926713 | rs8055243  | PRKCB | p12.1 | 0.330 | 0.919 |
| SNP_A-8533554 | 16 | 23930898 | rs17811655 | PRKCB | p12.1 | 0.135 | 0.436 |
| SNP_A-4268738 | 16 | 23931809 | rs4788426  | PRKCB | p12.1 | 0.342 | 0.520 |
| SNP_A-8532776 | 16 | 23937663 | rs11865731 | PRKCB | p12.1 | 0.250 | 0.159 |
| SNP_A-8298736 | 16 | 23941146 | rs7199551  | PRKCB | p12.1 | 0.413 | 0.792 |
| SNP_A-8427783 | 16 | 23942936 | rs7188812  | PRKCB | p12.1 | 0.297 | 0.168 |
| SNP_A-8593480 | 16 | 23946409 | rs12445528 | PRKCB | p12.1 | 0.064 | 0.305 |
| SNP_A-8717447 | 16 | 23946514 | rs7202459  | PRKCB | p12.1 | 0.280 | 0.356 |
| SNP_A-1782983 | 16 | 23953095 | rs4787291  | PRKCB | p12.1 | 0.193 | 0.956 |
| SNP_A-8676193 | 16 | 23957189 | rs2046892  | PRKCB | p12.1 | 0.461 | 0.117 |
| SNP_A-2185697 | 16 | 23965640 | rs16940401 | PRKCB | p12.1 | 0.152 | 0.321 |
| SNP_A-8416794 | 16 | 23967796 | rs17812348 | PRKCB | p12.1 | 0.213 | 0.242 |
| SNP_A-4242819 | 16 | 23978645 | rs8051750  | PRKCB | p12.1 | 0.158 | 0.648 |
| SNP_A-8290202 | 16 | 23978982 | rs7193148  | PRKCB | p12.1 | 0.158 | 0.681 |
| SNP_A-2079303 | 16 | 23994362 | rs9923820  | PRKCB | p12.1 | 0.055 | 0.918 |
| SNP_A-4193350 | 16 | 23995885 | rs9938298  | PRKCB | p12.1 | 0.246 | 0.228 |
| SNP_A-8353462 | 16 | 24006028 | rs6497721  | PRKCB | p12.1 | 0.084 | 0.088 |
| SNP_A-2238056 | 16 | 24007245 | rs1014632  | PRKCB | p12.1 | 0.438 | 0.695 |
| SNP_A-2029202 | 16 | 24010063 | rs2560406  | PRKCB | p12.1 | 0.440 | 0.571 |
| SNP_A-8571686 | 16 | 24011478 | rs9928102  | PRKCB | p12.1 | 0.076 | 0.805 |
| SNP_A-2044622 | 16 | 24022987 | rs405322   | PRKCB | p12.1 | 0.480 | 0.903 |
| SNP_A-8425689 | 16 | 24023323 | rs392715   | PRKCB | p12.1 | 0.338 | 0.329 |
| SNP_A-4243810 | 16 | 24024978 | rs2470688  | PRKCB | p12.1 | 0.480 | 0.967 |
| SNP_A-1848989 | 16 | 24035866 | rs174828   | PRKCB | p12.1 | 0.482 | 0.993 |
| SNP_A-8524392 | 16 | 24035888 | rs198197   | PRKCB | p12.1 | 0.419 | 0.972 |
| SNP_A-8491715 | 16 | 24036955 | rs198199   | PRKCB | p12.1 | 0.236 | 0.219 |
| SNP_A-8630995 | 16 | 24037686 | rs9937112  | PRKCB | p12.1 | 0.088 | 0.364 |
| SNP_A-2030963 | 16 | 24039886 | rs198182   | PRKCB | p12.1 | 0.237 | 0.224 |
| SNP_A-8303509 | 16 | 24040070 | rs11074606 | PRKCB | p12.1 | 0.303 | 0.554 |
| SNP_A-8613070 | 16 | 24041822 | rs9939028  | PRKCB | p12.1 | 0.312 | 0.733 |
| SNP_A-4293880 | 16 | 24042613 | rs1013316  | PRKCB | p12.1 | 0.358 | 0.632 |
| SNP_A-8629437 | 16 | 24043702 | rs198188   | PRKCB | p12.1 | 0.482 | 0.158 |

|               |    |          |            |         |        |       |       |
|---------------|----|----------|------------|---------|--------|-------|-------|
| SNP_A-4242825 | 16 | 24052529 | rs375624   | PRKCB   | p12.1  | 0.341 | 0.353 |
| SNP_A-1921094 | 16 | 24056542 | rs198202   | PRKCB   | p12.1  | 0.348 | 0.271 |
| SNP_A-1863454 | 16 | 24056638 | rs16973277 | PRKCB   | p12.1  | 0.091 | 0.310 |
| SNP_A-1797251 | 16 | 24059968 | rs381901   | PRKCB   | p12.1  | 0.260 | 0.345 |
| SNP_A-2030375 | 16 | 24064447 | rs2238493  | PRKCB   | p12.1  | 0.099 | 0.618 |
| SNP_A-2024152 | 16 | 24064671 | rs400066   | PRKCB   | p12.1  | 0.355 | 0.751 |
| SNP_A-8466968 | 16 | 24065071 | rs416951   | PRKCB   | p12.1  | 0.352 | 0.752 |
| SNP_A-4194607 | 16 | 24066835 | rs430151   | PRKCB   | p12.1  | 0.354 | 0.775 |
| SNP_A-4234949 | 16 | 24071789 | rs408882   | PRKCB   | p12.1  | 0.356 | 0.728 |
| SNP_A-2078655 | 16 | 24072225 | rs373634   | PRKCB   | p12.1  | 0.244 | 0.768 |
| SNP_A-1944736 | 16 | 24072424 | rs377133   | PRKCB   | p12.1  | 0.355 | 0.838 |
| SNP_A-8701863 | 16 | 24086743 | rs2283548  | PRKCB   | p12.1  | 0.246 | 0.270 |
| SNP_A-8475113 | 16 | 24094062 | rs11649514 | PRKCB   | p12.1  | 0.126 | 0.159 |
| SNP_A-8290204 | 16 | 24104683 | rs2239344  | PRKCB   | p12.1  | 0.355 | 0.704 |
| SNP_A-1886429 | 16 | 24106351 | rs198142   | PRKCB   | p12.1  | 0.059 | 0.539 |
| SNP_A-8672640 | 16 | 24109959 | rs3729904  | PRKCB   | p12.1  | 0.268 | 0.261 |
| SNP_A-8702073 | 16 | 24110116 | rs198145   | PRKCB   | p12.1  | 0.415 | 0.477 |
| SNP_A-8552188 | 16 | 24115010 | rs1548384  | PRKCB   | p12.1  | 0.190 | 0.978 |
| SNP_A-8388565 | 16 | 24115989 | rs2283549  | PRKCB   | p12.1  | 0.208 | 0.316 |
| SNP_A-2269698 | 16 | 24118877 | rs437545   | PRKCB   | p12.1  | 0.082 | 0.949 |
| SNP_A-8536185 | 16 | 24121088 | rs12445719 | PRKCB   | p12.1  | 0.128 | 0.976 |
| SNP_A-8631355 | 16 | 24125535 | rs1034600  | PRKCB   | p12.1  | 0.209 | 0.321 |
| SNP_A-1857696 | 16 | 24129259 | rs10852263 | PRKCB   | p12.1  | 0.210 | 0.370 |
| SNP_A-1871220 | 16 | 24134241 | rs3785380  | PRKCB   | p12.1  | 0.056 | 0.953 |
| SNP_A-1792118 | 16 | 24137386 | rs2239339  | PRKCB   | p12.1  | 0.177 | 0.468 |
| SNP_A-1792119 | 16 | 24138181 | rs2239340  | PRKCB   | p12.1  | 0.229 | 0.205 |
| SNP_A-2004625 | 16 | 24138749 | rs3729908  | PRKCB   | p12.1  | 0.121 | 0.993 |
| SNP_A-8474677 | 17 | 3710682  | rs9135     | CAMKK1  | p13.2  | 0.485 | 0.922 |
| SNP_A-8313730 | 17 | 3728542  | rs8065798  | CAMKK1  | p13.2  | 0.461 | 0.083 |
| SNP_A-8302477 | 17 | 3733656  | rs758642   | CAMKK1  | p13.2  | 0.348 | 0.690 |
| SNP_A-8709961 | 17 | 3740196  | rs753512   | CAMKK1  | p13.2  | 0.305 | 0.307 |
| SNP_A-8605871 | 17 | 11871706 | rs8067785  | MAP2K4  | p12    | 0.131 | 0.832 |
| SNP_A-1839176 | 17 | 11875751 | rs17613899 | MAP2K4  | p12    | 0.070 | 0.514 |
| SNP_A-1852889 | 17 | 11897717 | rs976244   | MAP2K4  | p12    | 0.229 | 0.432 |
| SNP_A-1826290 | 17 | 11912342 | rs12953206 | MAP2K4  | p12    | 0.227 | 0.500 |
| SNP_A-1839185 | 17 | 11917225 | rs2159140  | MAP2K4  | p12    | 0.229 | 0.462 |
| SNP_A-8499970 | 17 | 11918677 | rs12051769 | MAP2K4  | p12    | 0.244 | 0.694 |
| SNP_A-1801873 | 17 | 11922171 | rs2041152  | MAP2K4  | p12    | 0.228 | 0.476 |
| SNP_A-8544946 | 17 | 11924957 | rs8069300  | MAP2K4  | p12    | 0.477 | 0.221 |
| SNP_A-2146686 | 17 | 11925064 | rs9907196  | MAP2K4  | p12    | 0.229 | 0.448 |
| SNP_A-2240760 | 17 | 11929892 | rs929441   | MAP2K4  | p12    | 0.228 | 0.476 |
| SNP_A-2149870 | 17 | 11931404 | rs10432016 | MAP2K4  | p12    | 0.475 | 0.285 |
| SNP_A-8552754 | 17 | 11961213 | rs8082104  | MAP2K4  | p12    | 0.231 | 0.555 |
| SNP_A-8287493 | 17 | 11965072 | rs2108496  | MAP2K4  | p12    | 0.282 | 0.989 |
| SNP_A-8363981 | 17 | 11971834 | rs8065164  | MAP2K4  | p12    | 0.319 | 0.553 |
| SNP_A-8406599 | 17 | 11978533 | rs12942507 | MAP2K4  | p12    | 0.322 | 0.612 |
| SNP_A-8468750 | 17 | 21138998 | rs2363226  | MAP2K3  | p11.2  | 0.376 | 0.147 |
| SNP_A-1896113 | 17 | 21143931 | rs12451239 | MAP2K3  | p11.2  | 0.200 | 0.243 |
| SNP_A-1866779 | 17 | 21154375 | rs9901404  | MAP2K3  | p11.2  | 0.493 | 0.054 |
| SNP_A-2107388 | 17 | 21154846 | rs6587138  | MAP2K3  | p11.2  | 0.197 | 0.131 |
| SNP_A-8635525 | 17 | 21157832 | rs4114291  | MAP2K3  | p11.2  | 0.451 | 0.333 |
| SNP_A-2245106 | 17 | 40702763 | rs4792809  | MAP3K14 | q21.31 | 0.265 | 0.235 |
| SNP_A-8563382 | 17 | 40703393 | rs11574831 | MAP3K14 | q21.31 | 0.140 | 0.527 |
| SNP_A-4284378 | 17 | 40705703 | rs7214657  | MAP3K14 | q21.31 | 0.257 | 0.715 |
| SNP_A-8416863 | 17 | 40706449 | rs11079502 | MAP3K14 | q21.31 | 0.460 | 0.421 |
| SNP_A-2243646 | 17 | 40709546 | rs16939943 | MAP3K14 | q21.31 | 0.147 | 0.246 |
| SNP_A-2295307 | 17 | 40715911 | rs7207549  | MAP3K14 | q21.31 | 0.265 | 0.580 |
| SNP_A-8416115 | 17 | 40732230 | rs2867316  | MAP3K14 | q21.31 | 0.341 | 0.206 |
| SNP_A-8326507 | 17 | 40738883 | rs9908330  | MAP3K14 | q21.31 | 0.483 | 0.290 |
| SNP_A-8455367 | 17 | 40741132 | rs12449740 | MAP3K14 | q21.31 | 0.472 | 0.223 |
| SNP_A-8654263 | 17 | 40744196 | rs17686001 | MAP3K14 | q21.31 | 0.175 | 0.559 |
| SNP_A-8508351 | 17 | 59056721 | rs16947005 | MAP3K3  | q23.3  | 0.265 | 0.473 |
| SNP_A-8699960 | 17 | 59075874 | rs12940055 | MAP3K3  | q23.3  | 0.112 | 0.633 |
| SNP_A-4244679 | 17 | 59078427 | rs8081612  | MAP3K3  | q23.3  | 0.263 | 0.471 |
| SNP_A-2005247 | 17 | 59082613 | rs8075273  | MAP3K3  | q23.3  | 0.265 | 0.439 |
| SNP_A-4279365 | 17 | 59116763 | rs11658329 | MAP3K3  | q23.3  | 0.265 | 0.699 |
| SNP_A-8304923 | 17 | 59123188 | rs7211213  | MAP3K3  | q23.3  | 0.265 | 0.464 |
| SNP_A-1921805 | 17 | 61733114 | rs12601850 | PRKCA   | q24.2  | 0.417 | 0.586 |
| SNP_A-2182929 | 17 | 61735623 | rs9901804  | PRKCA   | q24.2  | 0.110 | 0.847 |
| SNP_A-8637914 | 17 | 61737476 | rs7210446  | PRKCA   | q24.2  | 0.449 | 0.697 |
| SNP_A-8330608 | 17 | 61738935 | rs4577128  | PRKCA   | q24.2  | 0.447 | 0.570 |
| SNP_A-1858482 | 17 | 61748819 | rs9912468  | PRKCA   | q24.2  | 0.449 | 0.553 |
| SNP_A-8395196 | 17 | 61762063 | rs9903921  | PRKCA   | q24.2  | 0.355 | 0.512 |
| SNP_A-8395590 | 17 | 61763024 | rs7218425  | PRKCA   | q24.2  | 0.267 | 0.689 |

|               |    |          |            |       |       |       |       |
|---------------|----|----------|------------|-------|-------|-------|-------|
| SNP_A-2188680 | 17 | 61777799 | rs9903792  | PRKCA | q24.2 | 0.389 | 0.714 |
| SNP_A-2269380 | 17 | 61789701 | rs9895580  | PRKCA | q24.2 | 0.372 | 0.841 |
| SNP_A-8525545 | 17 | 61793662 | rs4411531  | PRKCA | q24.2 | 0.160 | 0.934 |
| SNP_A-8396213 | 17 | 61798509 | rs10512510 | PRKCA | q24.2 | 0.071 | 0.603 |
| SNP_A-2136772 | 17 | 61800371 | rs8075066  | PRKCA | q24.2 | 0.295 | 0.353 |
| SNP_A-1867407 | 17 | 61801177 | rs9891403  | PRKCA | q24.2 | 0.231 | 0.796 |
| SNP_A-2267087 | 17 | 61813324 | rs8069142  | PRKCA | q24.2 | 0.230 | 0.965 |
| SNP_A-8612052 | 17 | 61813438 | rs8069454  | PRKCA | q24.2 | 0.230 | 0.874 |
| SNP_A-2099497 | 17 | 61813793 | rs4536508  | PRKCA | q24.2 | 0.139 | 0.305 |
| SNP_A-8504826 | 17 | 61814680 | rs7218479  | PRKCA | q24.2 | 0.138 | 0.281 |
| SNP_A-8381596 | 17 | 61815564 | rs8080178  | PRKCA | q24.2 | 0.158 | 0.914 |
| SNP_A-8623640 | 17 | 61816181 | rs12051710 | PRKCA | q24.2 | 0.173 | 0.982 |
| SNP_A-2225088 | 17 | 61817790 | rs6504424  | PRKCA | q24.2 | 0.296 | 0.325 |
| SNP_A-1867375 | 17 | 61828086 | rs6504425  | PRKCA | q24.2 | 0.111 | 0.519 |
| SNP_A-4251226 | 17 | 61828388 | rs7207097  | PRKCA | q24.2 | 0.151 | 0.199 |
| SNP_A-1955964 | 17 | 61839105 | rs4630585  | PRKCA | q24.2 | 0.111 | 0.527 |
| SNP_A-8490444 | 17 | 61840164 | rs6504428  | PRKCA | q24.2 | 0.112 | 0.464 |
| SNP_A-8378754 | 17 | 61840241 | rs12450967 | PRKCA | q24.2 | 0.384 | 0.902 |
| SNP_A-8646906 | 17 | 61841876 | rs16959227 | PRKCA | q24.2 | 0.099 | 0.992 |
| SNP_A-8395521 | 17 | 61843846 | rs2319523  | PRKCA | q24.2 | 0.374 | 0.557 |
| SNP_A-1959432 | 17 | 61844384 | rs16959229 | PRKCA | q24.2 | 0.143 | 0.825 |
| SNP_A-2240932 | 17 | 61849811 | rs16959238 | PRKCA | q24.2 | 0.242 | 0.341 |
| SNP_A-4244095 | 17 | 61850787 | rs7502206  | PRKCA | q24.2 | 0.081 | 0.270 |
| SNP_A-2292968 | 17 | 61853472 | rs9900927  | PRKCA | q24.2 | 0.080 | 0.285 |
| SNP_A-8395511 | 17 | 61858325 | rs9913908  | PRKCA | q24.2 | 0.287 | 0.336 |
| SNP_A-8534437 | 17 | 61859144 | rs973753   | PRKCA | q24.2 | 0.179 | 0.241 |
| SNP_A-4287828 | 17 | 61861309 | rs6504432  | PRKCA | q24.2 | 0.079 | 0.311 |
| SNP_A-2291229 | 17 | 61862056 | rs7405806  | PRKCA | q24.2 | 0.352 | 0.906 |
| SNP_A-2286282 | 17 | 61862086 | rs7211524  | PRKCA | q24.2 | 0.075 | 0.348 |
| SNP_A-2121258 | 17 | 61870469 | rs990082   | PRKCA | q24.2 | 0.283 | 0.370 |
| SNP_A-2053164 | 17 | 61870528 | rs990083   | PRKCA | q24.2 | 0.308 | 0.420 |
| SNP_A-2256224 | 17 | 61874091 | rs228884   | PRKCA | q24.2 | 0.416 | 0.605 |
| SNP_A-8447977 | 17 | 61878183 | rs12452749 | PRKCA | q24.2 | 0.053 | 0.568 |
| SNP_A-8629006 | 17 | 61878733 | rs4082895  | PRKCA | q24.2 | 0.420 | 0.035 |
| SNP_A-2241731 | 17 | 61883690 | rs17771145 | PRKCA | q24.2 | 0.129 | 0.509 |
| SNP_A-8382030 | 17 | 61885383 | rs11869711 | PRKCA | q24.2 | 0.093 | 0.211 |
| SNP_A-2060532 | 17 | 61885422 | rs7221805  | PRKCA | q24.2 | 0.398 | 0.035 |
| SNP_A-8678901 | 17 | 61890846 | rs1072186  | PRKCA | q24.2 | 0.051 | 0.615 |
| SNP_A-8526258 | 17 | 61893622 | rs3843733  | PRKCA | q24.2 | 0.348 | 0.070 |
| SNP_A-8684341 | 17 | 61903483 | rs3848421  | PRKCA | q24.2 | 0.384 | 0.062 |
| SNP_A-2027230 | 17 | 61903734 | rs3888658  | PRKCA | q24.2 | 0.186 | 0.339 |
| SNP_A-2127143 | 17 | 61907910 | rs34488708 | PRKCA | q24.2 | 0.195 | 0.155 |
| SNP_A-4201798 | 17 | 61911986 | rs3848418  | PRKCA | q24.2 | 0.390 | 0.102 |
| SNP_A-1783252 | 17 | 61912594 | rs7224628  | PRKCA | q24.2 | 0.371 | 0.093 |
| SNP_A-2049686 | 17 | 61912613 | rs7225164  | PRKCA | q24.2 | 0.387 | 0.073 |
| SNP_A-8480899 | 17 | 61919593 | rs179275   | PRKCA | q24.2 | 0.333 | 0.904 |
| SNP_A-8431703 | 17 | 61931405 | rs2244497  | PRKCA | q24.2 | 0.347 | 0.815 |
| SNP_A-4243251 | 17 | 61935106 | rs228879   | PRKCA | q24.2 | 0.429 | 0.987 |
| SNP_A-8405427 | 17 | 61938022 | rs7211424  | PRKCA | q24.2 | 0.482 | 0.879 |
| SNP_A-2081967 | 17 | 61940872 | rs4622543  | PRKCA | q24.2 | 0.481 | 0.751 |
| SNP_A-8676631 | 17 | 61942083 | rs2885290  | PRKCA | q24.2 | 0.482 | 0.785 |
| SNP_A-4292811 | 17 | 61942803 | rs16959447 | PRKCA | q24.2 | 0.181 | 0.842 |
| SNP_A-2180370 | 17 | 61944200 | rs16959450 | PRKCA | q24.2 | 0.181 | 0.849 |
| SNP_A-2021999 | 17 | 61944322 | rs9896922  | PRKCA | q24.2 | 0.425 | 0.902 |
| SNP_A-2070533 | 17 | 61944340 | rs9897124  | PRKCA | q24.2 | 0.481 | 0.751 |
| SNP_A-2190727 | 17 | 61948895 | rs9908953  | PRKCA | q24.2 | 0.326 | 0.748 |
| SNP_A-1873918 | 17 | 61948969 | rs956952   | PRKCA | q24.2 | 0.187 | 0.894 |
| SNP_A-2221459 | 17 | 61948989 | rs8080727  | PRKCA | q24.2 | 0.336 | 0.702 |
| SNP_A-4232536 | 17 | 61949332 | rs1355984  | PRKCA | q24.2 | 0.190 | 0.929 |
| SNP_A-1804756 | 17 | 61949724 | rs16959508 | PRKCA | q24.2 | 0.190 | 0.922 |
| SNP_A-2294345 | 17 | 61949893 | rs16959510 | PRKCA | q24.2 | 0.191 | 0.890 |
| SNP_A-2097923 | 17 | 61952114 | rs16959514 | PRKCA | q24.2 | 0.184 | 0.981 |
| SNP_A-8303780 | 17 | 61956857 | rs1806448  | PRKCA | q24.2 | 0.243 | 0.457 |
| SNP_A-2087723 | 17 | 61960104 | rs6504441  | PRKCA | q24.2 | 0.330 | 0.628 |
| SNP_A-1863104 | 17 | 61960613 | rs9898205  | PRKCA | q24.2 | 0.426 | 0.788 |
| SNP_A-4193637 | 17 | 61963519 | rs9908167  | PRKCA | q24.2 | 0.391 | 0.192 |
| SNP_A-8404731 | 17 | 61965362 | rs9303510  | PRKCA | q24.2 | 0.228 | 0.469 |
| SNP_A-4199748 | 17 | 61965600 | rs10512513 | PRKCA | q24.2 | 0.467 | 0.253 |
| SNP_A-8328793 | 17 | 61966341 | rs2361486  | PRKCA | q24.2 | 0.185 | 0.827 |
| SNP_A-4216996 | 17 | 61968793 | rs4791051  | PRKCA | q24.2 | 0.470 | 0.400 |
| SNP_A-8412006 | 17 | 61968926 | rs11656279 | PRKCA | q24.2 | 0.053 | 0.568 |
| SNP_A-8418885 | 17 | 61972174 | rs4791049  | PRKCA | q24.2 | 0.080 | 0.303 |
| SNP_A-8460686 | 17 | 61976025 | rs1533344  | PRKCA | q24.2 | 0.084 | 0.222 |
| SNP_A-8597495 | 17 | 61976115 | rs11658528 | PRKCA | q24.2 | 0.080 | 0.663 |



|               |    |          |            |       |       |       |       |
|---------------|----|----------|------------|-------|-------|-------|-------|
| SNP_A-4221069 | 17 | 61976384 | rs7220127  | PRKCA | q24.2 | 0.437 | 0.648 |
| SNP_A-1958321 | 17 | 61976744 | rs11869821 | PRKCA | q24.2 | 0.131 | 0.887 |
| SNP_A-2200892 | 17 | 61977504 | rs16959604 | PRKCA | q24.2 | 0.131 | 0.887 |
| SNP_A-8543855 | 17 | 61979435 | rs11871291 | PRKCA | q24.2 | 0.132 | 0.929 |
| SNP_A-8441385 | 17 | 61984879 | rs16959643 | PRKCA | q24.2 | 0.259 | 0.841 |
| SNP_A-1914091 | 17 | 61997624 | rs7219499  | PRKCA | q24.2 | 0.491 | 0.753 |
| SNP_A-2118344 | 17 | 61999089 | rs8066055  | PRKCA | q24.2 | 0.491 | 0.664 |
| SNP_A-1811249 | 17 | 62002932 | rs9904266  | PRKCA | q24.2 | 0.489 | 0.895 |
| SNP_A-8499176 | 17 | 62003178 | rs9905351  | PRKCA | q24.2 | 0.419 | 0.685 |
| SNP_A-2152891 | 17 | 62005044 | rs8069859  | PRKCA | q24.2 | 0.163 | 0.458 |
| SNP_A-1928161 | 17 | 62005954 | rs9900353  | PRKCA | q24.2 | 0.498 | 0.936 |
| SNP_A-8695792 | 17 | 62007136 | rs16969771 | PRKCA | q24.2 | 0.162 | 0.345 |
| SNP_A-8315530 | 17 | 62009304 | rs8072557  | PRKCA | q24.2 | 0.340 | 0.909 |
| SNP_A-4283037 | 17 | 62009399 | rs41493450 | PRKCA | q24.2 | 0.114 | 0.241 |
| SNP_A-4255468 | 17 | 62009413 | rs8072741  | PRKCA | q24.2 | 0.341 | 0.957 |
| SNP_A-8582026 | 17 | 62012473 | rs9646428  | PRKCA | q24.2 | 0.341 | 0.994 |
| SNP_A-8549981 | 17 | 62012633 | rs9646423  | PRKCA | q24.2 | 0.254 | 0.970 |
| SNP_A-8567520 | 17 | 62013785 | rs11867563 | PRKCA | q24.2 | 0.157 | 0.394 |
| SNP_A-8384035 | 17 | 62029903 | rs9896134  | PRKCA | q24.2 | 0.241 | 0.803 |
| SNP_A-8654964 | 17 | 62030661 | rs17759410 | PRKCA | q24.2 | 0.159 | 0.283 |
| SNP_A-1947916 | 17 | 62030921 | rs17686174 | PRKCA | q24.2 | 0.255 | 0.976 |
| SNP_A-8589384 | 17 | 62031050 | rs8076312  | PRKCA | q24.2 | 0.357 | 0.663 |
| SNP_A-8655183 | 17 | 62032253 | rs9897094  | PRKCA | q24.2 | 0.343 | 0.865 |
| SNP_A-8296369 | 17 | 62035966 | rs17686310 | PRKCA | q24.2 | 0.191 | 0.226 |
| SNP_A-8384953 | 17 | 62037186 | rs9908814  | PRKCA | q24.2 | 0.193 | 0.115 |
| SNP_A-4243757 | 17 | 62037797 | rs227915   | PRKCA | q24.2 | 0.159 | 0.922 |
| SNP_A-8403981 | 17 | 62037856 | rs227913   | PRKCA | q24.2 | 0.353 | 0.227 |
| SNP_A-8403980 | 17 | 62038189 | rs170586   | PRKCA | q24.2 | 0.441 | 0.664 |
| SNP_A-1906768 | 17 | 62051541 | rs10451280 | PRKCA | q24.2 | 0.078 | 0.333 |
| SNP_A-8560715 | 17 | 62051846 | rs16959756 | PRKCA | q24.2 | 0.161 | 0.764 |
| SNP_A-8318654 | 17 | 62056995 | rs877447   | PRKCA | q24.2 | 0.486 | 0.132 |
| SNP_A-1956367 | 17 | 62057774 | rs980346   | PRKCA | q24.2 | 0.490 | 0.181 |
| SNP_A-8475669 | 17 | 62058850 | rs11079662 | PRKCA | q24.2 | 0.170 | 0.538 |
| SNP_A-8349618 | 17 | 62065178 | rs12451852 | PRKCA | q24.2 | 0.065 | 0.669 |
| SNP_A-4256707 | 17 | 62067234 | rs17760398 | PRKCA | q24.2 | 0.065 | 0.696 |
| SNP_A-8434479 | 17 | 62076618 | rs1860985  | PRKCA | q24.2 | 0.069 | 0.562 |
| SNP_A-2048555 | 17 | 62080864 | rs12600582 | PRKCA | q24.2 | 0.268 | 0.085 |
| SNP_A-8624311 | 17 | 62081128 | rs9893679  | PRKCA | q24.2 | 0.473 | 0.027 |
| SNP_A-4223013 | 17 | 62085377 | rs9911259  | PRKCA | q24.2 | 0.485 | 0.612 |
| SNP_A-2199130 | 17 | 62085478 | rs17688050 | PRKCA | q24.2 | 0.218 | 0.714 |
| SNP_A-1808534 | 17 | 62085528 | rs16959880 | PRKCA | q24.2 | 0.485 | 0.532 |
| SNP_A-4255015 | 17 | 62088612 | rs16959890 | PRKCA | q24.2 | 0.170 | 0.532 |
| SNP_A-2287011 | 17 | 62091986 | rs9896549  | PRKCA | q24.2 | 0.446 | 0.716 |
| SNP_A-2050183 | 17 | 62093465 | rs12450569 | PRKCA | q24.2 | 0.055 | 0.550 |
| SNP_A-1825738 | 17 | 62093747 | rs7207345  | PRKCA | q24.2 | 0.237 | 0.984 |
| SNP_A-8427406 | 17 | 62096890 | rs9907013  | PRKCA | q24.2 | 0.070 | 0.990 |
| SNP_A-8519187 | 17 | 62097085 | rs11868943 | PRKCA | q24.2 | 0.222 | 0.915 |
| SNP_A-8439372 | 17 | 62114727 | rs17689224 | PRKCA | q24.2 | 0.204 | 0.436 |
| SNP_A-8440229 | 17 | 62115027 | rs1010546  | PRKCA | q24.2 | 0.117 | 0.175 |
| SNP_A-4251177 | 17 | 62117908 | rs1010544  | PRKCA | q24.2 | 0.245 | 0.203 |
| SNP_A-8331770 | 17 | 62128843 | rs9912033  | PRKCA | q24.2 | 0.170 | 0.772 |
| SNP_A-1883468 | 17 | 62132371 | rs16960077 | PRKCA | q24.2 | 0.054 | 0.542 |
| SNP_A-4251175 | 17 | 62133841 | rs7217618  | PRKCA | q24.2 | 0.456 | 0.387 |
| SNP_A-1867036 | 17 | 62134339 | rs10491200 | PRKCA | q24.2 | 0.053 | 0.545 |
| SNP_A-8502197 | 17 | 62137923 | rs16960091 | PRKCA | q24.2 | 0.169 | 0.679 |
| SNP_A-8298509 | 17 | 62139491 | rs17689871 | PRKCA | q24.2 | 0.274 | 0.195 |
| SNP_A-1920173 | 17 | 62145570 | rs9900205  | PRKCA | q24.2 | 0.198 | 0.570 |
| SNP_A-8704198 | 17 | 62146859 | rs9914723  | PRKCA | q24.2 | 0.204 | 0.700 |
| SNP_A-2222070 | 17 | 62147088 | rs16960114 | PRKCA | q24.2 | 0.202 | 0.231 |
| SNP_A-2189084 | 17 | 62148608 | rs4630584  | PRKCA | q24.2 | 0.380 | 0.373 |
| SNP_A-2055994 | 17 | 62148632 | rs4465636  | PRKCA | q24.2 | 0.205 | 0.331 |
| SNP_A-8680252 | 17 | 62152607 | rs7219495  | PRKCA | q24.2 | 0.390 | 0.526 |
| SNP_A-8697206 | 17 | 62161348 | rs4257241  | PRKCA | q24.2 | 0.338 | 0.423 |
| SNP_A-8440411 | 17 | 62161640 | rs8067877  | PRKCA | q24.2 | 0.366 | 0.527 |
| SNP_A-8377790 | 17 | 62161745 | rs6504450  | PRKCA | q24.2 | 0.366 | 0.618 |
| SNP_A-8562075 | 17 | 62161864 | rs6504452  | PRKCA | q24.2 | 0.351 | 0.669 |
| SNP_A-8320460 | 17 | 62163427 | rs10853078 | PRKCA | q24.2 | 0.272 | 0.058 |
| SNP_A-8388504 | 17 | 62164024 | rs12451026 | PRKCA | q24.2 | 0.292 | 0.483 |
| SNP_A-8474698 | 17 | 62164112 | rs16960132 | PRKCA | q24.2 | 0.095 | 0.036 |
| SNP_A-8496099 | 17 | 62167044 | rs8082010  | PRKCA | q24.2 | 0.069 | 0.053 |
| SNP_A-1835773 | 17 | 62167920 | rs3803822  | PRKCA | q24.2 | 0.410 | 0.616 |
| SNP_A-2253886 | 17 | 62168179 | rs3803821  | PRKCA | q24.2 | 0.483 | 0.348 |
| SNP_A-8288419 | 17 | 62168759 | rs3803820  | PRKCA | q24.2 | 0.070 | 0.070 |
| SNP_A-1867020 | 17 | 62176152 | rs4644888  | PRKCA | q24.2 | 0.487 | 0.584 |

|               |    |          |            |         |       |       |       |
|---------------|----|----------|------------|---------|-------|-------|-------|
| SNP_A-1876174 | 17 | 62190050 | rs9893560  | PRKCA   | q24.2 | 0.105 | 0.615 |
| SNP_A-2146600 | 17 | 62196905 | rs4381631  | PRKCA   | q24.2 | 0.493 | 0.654 |
| SNP_A-1942977 | 17 | 62201284 | rs17643302 | PRKCA   | q24.2 | 0.084 | 0.169 |
| SNP_A-8427742 | 17 | 62203761 | rs4528612  | PRKCA   | q24.2 | 0.226 | 0.220 |
| SNP_A-1867018 | 17 | 62204090 | rs17710992 | PRKCA   | q24.2 | 0.308 | 0.510 |
| SNP_A-8378416 | 17 | 62206603 | rs9896905  | PRKCA   | q24.2 | 0.082 | 0.313 |
| SNP_A-8703022 | 17 | 62209616 | rs4790904  | PRKCA   | q24.2 | 0.218 | 0.402 |
| SNP_A-1826970 | 17 | 62209892 | rs3889237  | PRKCA   | q24.2 | 0.395 | 0.997 |
| SNP_A-2168171 | 17 | 62214645 | rs9890506  | PRKCA   | q24.2 | 0.085 | 0.190 |
| SNP_A-2084000 | 17 | 62214665 | rs9890888  | PRKCA   | q24.2 | 0.085 | 0.425 |
| SNP_A-2301514 | 17 | 62214907 | rs9896575  | PRKCA   | q24.2 | 0.086 | 0.453 |
| SNP_A-2067915 | 17 | 62218035 | rs4791040  | PRKCA   | q24.2 | 0.061 | 0.846 |
| SNP_A-2072295 | 17 | 62218356 | rs4791037  | PRKCA   | q24.2 | 0.055 | 0.499 |
| SNP_A-1952795 | 17 | 62219289 | rs16960228 | PRKCA   | q24.2 | 0.054 | 0.553 |
| SNP_A-8307644 | 17 | 62222593 | rs8074995  | PRKCA   | q24.2 | 0.118 | 0.682 |
| SNP_A-8378992 | 17 | 62223795 | rs4254365  | PRKCA   | q24.2 | 0.375 | 0.994 |
| SNP_A-8437322 | 17 | 62227597 | rs4791036  | PRKCA   | q24.2 | 0.103 | 0.520 |
| SNP_A-8421276 | 17 | 62228959 | rs7216764  | PRKCA   | q24.2 | 0.051 | 0.607 |
| SNP_A-2131637 | 17 | 64021487 | rs4265886  | PRKAR1A | q24.2 | 0.356 | 0.581 |
| SNP_A-2254722 | 17 | 64023679 | rs16972996 | PRKAR1A | q24.2 | 0.136 | 0.583 |
| SNP_A-8470906 | 17 | 64023836 | rs4281788  | PRKAR1A | q24.2 | 0.210 | 0.651 |
| SNP_A-2080107 | 17 | 64024620 | rs8076465  | PRKAR1A | q24.2 | 0.356 | 0.319 |
| SNP_A-1850614 | 17 | 64030258 | rs2952275  | PRKAR1A | q24.2 | 0.359 | 0.516 |
| SNP_A-4229112 | 17 | 64035235 | rs3785906  | PRKAR1A | q24.2 | 0.208 | 0.606 |
| SNP_A-2106125 | 17 | 64041374 | rs2952271  | FAM20A  | q24.2 | 0.357 | 0.330 |
| SNP_A-1873320 | 17 | 64042744 | rs2952270  | FAM20A  | q24.2 | 0.300 | 0.385 |
| SNP_A-2146656 | 17 | 64049834 | rs2302234  | FAM20A  | q24.2 | 0.293 | 0.511 |
| SNP_A-1936451 | 17 | 64050013 | rs2302235  | FAM20A  | q24.2 | 0.141 | 0.765 |
| SNP_A-1868880 | 17 | 64051030 | rs10491176 | FAM20A  | q24.2 | 0.131 | 0.407 |
| SNP_A-1868881 | 17 | 64051442 | rs2286562  | FAM20A  | q24.2 | 0.166 | 0.148 |
| SNP_A-8599938 | 17 | 64056940 | rs2952314  | FAM20A  | q24.2 | 0.169 | 0.925 |
| SNP_A-1878279 | 17 | 64057725 | rs7213247  | FAM20A  | q24.2 | 0.164 | 0.923 |
| SNP_A-4283440 | 17 | 64924226 | rs707248   | MAP2K6  | q24.3 | 0.427 | 0.620 |
| SNP_A-2311053 | 17 | 64924561 | rs817549   | MAP2K6  | q24.3 | 0.432 | 0.919 |
| SNP_A-2313584 | 17 | 64924711 | rs817547   | MAP2K6  | q24.3 | 0.428 | 0.571 |
| SNP_A-8352055 | 17 | 64926630 | rs8074385  | MAP2K6  | q24.3 | 0.063 | 0.319 |
| SNP_A-2191548 | 17 | 64926642 | rs817544   | MAP2K6  | q24.3 | 0.430 | 0.590 |
| SNP_A-8329996 | 17 | 64934823 | rs7209210  | MAP2K6  | q24.3 | 0.073 | 0.871 |
| SNP_A-1822751 | 17 | 64934869 | rs817555   | MAP2K6  | q24.3 | 0.443 | 0.544 |
| SNP_A-8537516 | 17 | 64938207 | rs707247   | MAP2K6  | q24.3 | 0.476 | 0.915 |
| SNP_A-8609211 | 17 | 64945820 | rs12451722 | MAP2K6  | q24.3 | 0.420 | 0.349 |
| SNP_A-8661297 | 17 | 64951034 | rs9910030  | MAP2K6  | q24.3 | 0.075 | 0.769 |
| SNP_A-1932881 | 17 | 64951048 | rs12453226 | MAP2K6  | q24.3 | 0.417 | 0.903 |
| SNP_A-1823511 | 17 | 64953869 | rs2365494  | MAP2K6  | q24.3 | 0.075 | 0.772 |
| SNP_A-8303630 | 17 | 64954463 | rs6501326  | MAP2K6  | q24.3 | 0.494 | 0.049 |
| SNP_A-8541255 | 17 | 64976884 | rs2521367  | MAP2K6  | q24.3 | 0.343 | 0.865 |
| SNP_A-2280275 | 17 | 64979552 | rs2716225  | MAP2K6  | q24.3 | 0.489 | 0.894 |
| SNP_A-8495526 | 17 | 64981043 | rs12945375 | MAP2K6  | q24.3 | 0.173 | 0.326 |
| SNP_A-8422667 | 17 | 64981435 | rs2715814  | MAP2K6  | q24.3 | 0.485 | 0.822 |
| SNP_A-4251827 | 17 | 64984507 | rs2028048  | MAP2K6  | q24.3 | 0.167 | 0.625 |
| SNP_A-8305709 | 17 | 64988065 | rs9907575  | MAP2K6  | q24.3 | 0.072 | 0.928 |
| SNP_A-8299922 | 17 | 64988408 | rs11869073 | MAP2K6  | q24.3 | 0.164 | 0.190 |
| SNP_A-8413108 | 17 | 64993579 | rs9302900  | MAP2K6  | q24.3 | 0.263 | 0.308 |
| SNP_A-4199913 | 17 | 64993909 | rs8078890  | MAP2K6  | q24.3 | 0.468 | 0.015 |
| SNP_A-1869370 | 17 | 64993948 | rs8077944  | MAP2K6  | q24.3 | 0.472 | 0.069 |
| SNP_A-8487906 | 17 | 65001137 | rs2249009  | MAP2K6  | q24.3 | 0.425 | 0.284 |
| SNP_A-8547723 | 17 | 65001825 | rs739559   | MAP2K6  | q24.3 | 0.405 | 0.632 |
| SNP_A-2240714 | 17 | 65013733 | rs2074027  | MAP2K6  | q24.3 | 0.425 | 0.202 |
| SNP_A-1821332 | 17 | 65017409 | rs2716211  | MAP2K6  | q24.3 | 0.431 | 0.604 |
| SNP_A-1894034 | 17 | 65023464 | rs2715824  | MAP2K6  | q24.3 | 0.431 | 0.520 |
| SNP_A-1803315 | 17 | 65024330 | rs17769598 | MAP2K6  | q24.3 | 0.177 | 0.316 |
| SNP_A-4275260 | 17 | 65024650 | rs2251855  | MAP2K6  | q24.3 | 0.418 | 0.470 |
| SNP_A-8413802 | 17 | 65026287 | rs2716208  | MAP2K6  | q24.3 | 0.392 | 0.414 |
| SNP_A-2211448 | 17 | 65033094 | rs17691066 | MAP2K6  | q24.3 | 0.065 | 0.669 |
| SNP_A-8292057 | 17 | 65033968 | rs2074029  | MAP2K6  | q24.3 | 0.429 | 0.989 |
| SNP_A-8400200 | 17 | 65034855 | rs2074032  | MAP2K6  | q24.3 | 0.416 | 0.831 |
| SNP_A-2092702 | 17 | 65037811 | rs11869376 | MAP2K6  | q24.3 | 0.194 | 0.143 |
| SNP_A-8657651 | 17 | 65038344 | rs2716197  | MAP2K6  | q24.3 | 0.417 | 0.625 |
| SNP_A-8611015 | 17 | 65047718 | rs12600726 | MAP2K6  | q24.3 | 0.169 | 0.655 |
| SNP_A-2042052 | 18 | 46346987 | rs4939634  | MAPK4   | q21.1 | 0.479 | 0.869 |
| SNP_A-4271010 | 18 | 46347255 | rs4939635  | MAPK4   | q21.1 | 0.479 | 0.775 |
| SNP_A-1910699 | 18 | 46350750 | rs8089517  | MAPK4   | q21.1 | 0.474 | 0.788 |
| SNP_A-1910701 | 18 | 46351008 | rs8093289  | MAPK4   | q21.1 | 0.193 | 0.798 |
| SNP_A-8634224 | 18 | 46354353 | rs11873590 | MAPK4   | q21.1 | 0.236 | 0.557 |

|               |    |          |            |         |        |       |       |
|---------------|----|----------|------------|---------|--------|-------|-------|
| SNP_A-2029495 | 18 | 46358644 | rs4081996  | MAPK4   | q21.1  | 0.441 | 0.672 |
| SNP_A-2077720 | 18 | 46358871 | rs6508009  | MAPK4   | q21.1  | 0.441 | 0.672 |
| SNP_A-8443809 | 18 | 46360410 | rs2338830  | MAPK4   | q21.1  | 0.245 | 0.516 |
| SNP_A-1840856 | 18 | 46363323 | rs4939637  | MAPK4   | q21.1  | 0.276 | 0.174 |
| SNP_A-2084294 | 18 | 46365043 | rs10432161 | MAPK4   | q21.1  | 0.246 | 0.068 |
| SNP_A-1924448 | 18 | 46365439 | rs10432162 | MAPK4   | q21.1  | 0.246 | 0.068 |
| SNP_A-4227612 | 18 | 46365939 | rs1370480  | MAPK4   | q21.1  | 0.246 | 0.068 |
| SNP_A-1843099 | 18 | 46372358 | rs4322755  | MAPK4   | q21.1  | 0.471 | 0.805 |
| SNP_A-2146390 | 18 | 46377759 | rs930362   | MAPK4   | q21.1  | 0.287 | 0.339 |
| SNP_A-2307651 | 18 | 46378713 | rs992595   | MAPK4   | q21.1  | 0.473 | 0.785 |
| SNP_A-1947210 | 18 | 46378761 | rs17742008 | MAPK4   | q21.1  | 0.212 | 0.484 |
| SNP_A-8310896 | 18 | 46383685 | rs1437650  | MAPK4   | q21.1  | 0.483 | 0.581 |
| SNP_A-4256042 | 18 | 46384530 | rs10502909 | MAPK4   | q21.1  | 0.318 | 0.923 |
| SNP_A-4259820 | 18 | 46384859 | rs3862671  | MAPK4   | q21.1  | 0.483 | 0.756 |
| SNP_A-1948352 | 18 | 46394236 | rs4599004  | MAPK4   | q21.1  | 0.220 | 0.446 |
| SNP_A-8540435 | 18 | 46398569 | rs17742138 | MAPK4   | q21.1  | 0.244 | 0.637 |
| SNP_A-2063695 | 18 | 46401874 | rs1025688  | MAPK4   | q21.2  | 0.410 | 0.592 |
| SNP_A-4250076 | 18 | 46402020 | rs1437648  | MAPK4   | q21.2  | 0.347 | 0.191 |
| SNP_A-1865911 | 18 | 46406082 | rs4939992  | MAPK4   | q21.2  | 0.067 | 0.440 |
| SNP_A-1903084 | 18 | 46409165 | rs9304402  | MAPK4   | q21.2  | 0.483 | 0.694 |
| SNP_A-1800249 | 18 | 46411251 | rs12604601 | MAPK4   | q21.2  | 0.294 | 0.672 |
| SNP_A-8394969 | 18 | 46411609 | rs9959686  | MAPK4   | q21.2  | 0.491 | 0.712 |
| SNP_A-1961567 | 18 | 46413307 | rs4939996  | MAPK4   | q21.2  | 0.359 | 0.247 |
| SNP_A-1913136 | 18 | 46413561 | rs17718895 | MAPK4   | q21.2  | 0.187 | 0.920 |
| SNP_A-8426085 | 18 | 46414902 | rs4939641  | MAPK4   | q21.2  | 0.187 | 0.945 |
| SNP_A-1860349 | 18 | 46415542 | rs2118370  | MAPK4   | q21.2  | 0.187 | 0.945 |
| SNP_A-8382084 | 18 | 46416077 | rs12454262 | MAPK4   | q21.2  | 0.316 | 0.928 |
| SNP_A-8447346 | 18 | 46416160 | rs12456953 | MAPK4   | q21.2  | 0.316 | 0.731 |
| SNP_A-1942940 | 18 | 46418942 | rs17662557 | MAPK4   | q21.2  | 0.169 | 0.627 |
| SNP_A-4283499 | 18 | 46419749 | rs17804574 | MAPK4   | q21.2  | 0.299 | 0.988 |
| SNP_A-1913499 | 18 | 46420290 | rs973644   | MAPK4   | q21.2  | 0.170 | 0.853 |
| SNP_A-4250717 | 18 | 46420554 | rs893316   | MAPK4   | q21.2  | 0.218 | 0.507 |
| SNP_A-2220756 | 18 | 46420686 | rs934746   | MAPK4   | q21.2  | 0.095 | 0.491 |
| SNP_A-8536496 | 18 | 46429046 | rs12958523 | MAPK4   | q21.2  | 0.429 | 0.828 |
| SNP_A-8519820 | 18 | 46431858 | rs11662176 | MAPK4   | q21.2  | 0.328 | 0.938 |
| SNP_A-8330623 | 18 | 46434954 | rs7235791  | MAPK4   | q21.2  | 0.254 | 0.987 |
| SNP_A-2222541 | 18 | 46442790 | rs3813086  | MAPK4   | q21.2  | 0.245 | 0.804 |
| SNP_A-8333032 | 18 | 46445557 | rs8097986  | MAPK4   | q21.2  | 0.473 | 0.424 |
| SNP_A-2071102 | 18 | 46448639 | rs2051308  | MAPK4   | q21.2  | 0.330 | 0.748 |
| SNP_A-2181980 | 18 | 46449257 | rs9955932  | MAPK4   | q21.2  | 0.475 | 0.982 |
| SNP_A-1915587 | 18 | 46474454 | rs17742551 | MAPK4   | q21.2  | 0.109 | 0.275 |
| SNP_A-2276340 | 18 | 46474527 | rs1545130  | MAPK4   | q21.2  | 0.496 | 0.519 |
| SNP_A-8712770 | 18 | 46476105 | rs17804724 | MAPK4   | q21.2  | 0.108 | 0.240 |
| SNP_A-8527554 | 18 | 46494835 | rs12959952 | MAPK4   | q21.2  | 0.407 | 0.368 |
| SNP_A-8648704 | 18 | 46497759 | rs3794897  | MAPK4   | q21.2  | 0.326 | 0.867 |
| SNP_A-8287196 | 19 | 43780301 | rs7251456  | MAP4K1  | q13.2  | 0.117 | 0.548 |
| SNP_A-1784555 | 19 | 45393021 | rs10402740 | MAP3K10 | q13.2  | 0.233 | 0.431 |
| SNP_A-8655530 | 19 | 45403173 | rs892117   | MAP3K10 | q13.2  | 0.500 | 1.000 |
| SNP_A-8596766 | 19 | 59083494 | rs307952   | PRKCG   | q13.41 | 0.281 | 0.409 |
| SNP_A-8556976 | 19 | 59089466 | rs8103851  | PRKCG   | q13.41 | 0.396 | 0.843 |
| SNP_A-1934646 | 19 | 59096288 | rs307943   | PRKCG   | q13.41 | 0.182 | 0.585 |
| SNP_A-8524335 | 20 | 42597752 | rs3092590  | PKIG    | q13.12 | 0.095 | 0.108 |
| SNP_A-8465870 | 20 | 42612081 | rs11086929 | PKIG    | q13.12 | 0.055 | 0.384 |
| SNP_A-8378404 | 20 | 42622942 | rs6017364  | PKIG    | q13.12 | 0.076 | 0.745 |
| SNP_A-4269175 | 20 | 42636532 | rs6031659  | PKIG    | q13.12 | 0.150 | 0.752 |
| SNP_A-8323666 | 20 | 42641966 | rs1547430  | PKIG    | q13.12 | 0.442 | 0.401 |
| SNP_A-8651892 | 20 | 42643249 | rs2027871  | PKIG    | q13.12 | 0.435 | 0.665 |
| SNP_A-8503749 | 20 | 42643895 | rs6031663  | PKIG    | q13.12 | 0.074 | 0.804 |
| SNP_A-2143008 | 20 | 42653390 | rs244104   | PKIG    | q13.12 | 0.147 | 0.919 |
| SNP_A-2268415 | 20 | 42658880 | rs244099   | PKIG    | q13.12 | 0.162 | 0.963 |
| SNP_A-1781275 | 20 | 42659791 | rs244098   | PKIG    | q13.12 | 0.170 | 0.772 |
| SNP_A-4260238 | 20 | 42660410 | rs244097   | PKIG    | q13.12 | 0.151 | 0.556 |
| SNP_A-8604494 | 20 | 42662198 | rs244096   | PKIG    | q13.12 | 0.147 | 0.904 |
| SNP_A-8518959 | 22 | 20445004 | rs6928     | MAPK1   | q11.21 | 0.439 | 0.686 |
| SNP_A-8651504 | 22 | 20451327 | rs5755074  | MAPK1   | q11.21 | 0.052 | 0.271 |
| SNP_A-8587058 | 22 | 20451554 | rs2266966  | MAPK1   | q11.21 | 0.440 | 0.709 |
| SNP_A-4244267 | 22 | 20452149 | rs17759598 | MAPK1   | q11.21 | 0.166 | 0.535 |
| SNP_A-2270792 | 22 | 20453189 | rs2298432  | MAPK1   | q11.21 | 0.345 | 0.639 |
| SNP_A-1880487 | 22 | 20461125 | rs2283792  | MAPK1   | q11.21 | 0.437 | 0.708 |
| SNP_A-4243307 | 22 | 20471825 | rs5749939  | MAPK1   | q11.21 | 0.054 | 0.310 |
| SNP_A-4245033 | 22 | 20475101 | rs5999515  | MAPK1   | q11.21 | 0.437 | 0.536 |
| SNP_A-2120047 | 22 | 20476399 | rs5999521  | MAPK1   | q11.21 | 0.438 | 0.584 |
| SNP_A-8614321 | 22 | 20481821 | rs9610338  | MAPK1   | q11.21 | 0.438 | 0.556 |
| SNP_A-4298195 | 22 | 20483239 | rs2298434  | MAPK1   | q11.21 | 0.053 | 0.064 |

|               |    |          |            |       |        |       |       |
|---------------|----|----------|------------|-------|--------|-------|-------|
| SNP_A-4201707 | 22 | 20487661 | rs5749986  | MAPK1 | q11.21 | 0.438 | 0.584 |
| SNP_A-8579523 | 22 | 20510183 | rs7286558  | MAPK1 | q11.22 | 0.071 | 0.256 |
| SNP_A-4253585 | 22 | 20517660 | rs5999749  | MAPK1 | q11.22 | 0.437 | 0.483 |
| SNP_A-2046461 | 22 | 20520163 | rs17759796 | MAPK1 | q11.22 | 0.166 | 0.363 |
| SNP_A-1876854 | 22 | 20530530 | rs5755694  | MAPK1 | q11.22 | 0.415 | 0.157 |
| SNP_A-8497959 | 22 | 20539139 | rs9610470  | MAPK1 | q11.22 | 0.237 | 0.138 |
| SNP_A-8428219 | 22 | 20543969 | rs9610487  | MAPK1 | q11.22 | 0.237 | 0.135 |
| SNP_A-8693764 | 22 | 36793087 | rs3026688  | PICK1 | q13.1  | 0.258 | 0.556 |
